# Supplementary material
Source: publisher figshare collection journal article supplement (https://diabetesjournals.figshare.com/articles/dataset/_/27273519)
Supplement: Supplementary file 1 [file 1]

## Sheet: rod (cluster 1)
1M STZ vs Ctrl		p_val	avg_log2FC		2M STZ vs Ctrl		p_val	avg_log2FC		3M STZ vs Ctrl			p_val	avg_log2FC
	Gnb1	1.34784e-170	-0.78131			Gnb3	1.99934e-187	2.47849				Zmat4	1.04293e-156	1.74284
	H3f3c	7.18451e-162	1.19075			Cntn4	7.67393e-86	1.94881				Cabp5	4.52846e-110	1.73888
	Gnb3	1.63601e-156	1.86314			Ptms	5.06323e-122	1.88048				Gnb3	0	1.65206
	RT1-A1	3.62358e-133	1.62909			Mlf1	4.72844e-97	1.87702				Pla2g4c	2.41037e-98	1.6515
	Gngt1	1.46519e-114	0.681227			Ptprn2	7.03065e-82	1.85249				Ptprn2	5.28539e-165	1.59982
	Naa35	1.7979e-99	1.28726			AABR07035916.1	4.30376e-71	1.6534				Gadd45g	4.64919e-137	1.4626
	RGD1560925	2.28499e-98	-0.703645			Tmsb4x	2.5125e-86	1.61217				Mlf1	1.53145e-151	1.39688
	Mt-co1	5.42055e-98	1.09317			Zmat4	1.17012e-68	1.57257				Tmsb4x	6.98486e-152	1.27879
	H3f3a	9.52601e-98	0.613123			Mt-co1	8.60803e-236	1.46481				Sh3rf1	4.04279e-86	1.21636
	AABR07000398.1	5.51232e-96	0.660418			Gadd45g	6.86682e-57	1.44594				Ptms	1.11585e-132	1.13684
	Cacnb2	2.31814e-95	-0.802636			AABR07033882.1	1.53512e-33	1.31304				AABR07035916.1	7.211e-74	1.12977
	Rp1	1.81875e-94	-0.723337			Samd4a	2.14467e-52	1.26694				Gpr162	1.51356e-80	1.0858
	Dennd4a	2.5626e-93	1.25123			Ckb	4.90003e-97	1.25459				Gnb2	1.65529e-64	0.999176
	Ndufa4	7.32451e-90	1.05581			Ptprn	1.3053e-42	1.23415				Agtpbp1	6.74688e-133	0.960814
	Agtpbp1	2.37469e-88	1.10018			Pla2g4c	1.64839e-24	1.21492				Cd47	3.57052e-89	0.957648
	Gadd45g	1.96005e-83	1.86919			Naa35	1.19757e-48	1.15881				Naa35	1.10681e-111	0.949021
	Pde6b	3.73492e-78	-0.684933			Cd47	2.67322e-49	1.1435				Asap2	8.57007e-62	0.941231
	Anks1b	1.65732e-77	-1.87072			Prdx2	5.42454e-63	1.13937				Thra	1.9066e-62	0.898536
	RT1-CE10	1.92567e-77	1.3824			Gnb2	2.18508e-43	1.13671				Cntn4	1.51404e-75	0.889256
	Cabp4	2.07776e-75	-0.788529			H3f3c	3.20059e-145	1.13026				Fos	2.40546e-39	0.888755
	Cox8a	1.12614e-74	0.998125			Cox4i1	6.19599e-75	1.11806				Mettl7a	3.59174e-63	0.859202
	Mlf1	1.84566e-74	1.5151			Cox8a	1.10787e-99	1.08159				Nme2	5.22194e-52	0.82714
	Mt-co2	6.64382e-74	0.973039			Nme2	2.81688e-40	1.06919				Lnx1	5.70339e-52	0.796729
	Mt-nd2	1.3038e-73	1.03677			Agtpbp1	1.09196e-59	1.05937				Acsl3	1.59653e-47	0.783683
	Frmd4b	3.7775e-72	-0.667433			Atp5mc2	4.35663e-54	1.036				LOC100361457	4.42231e-88	0.782164
	LOC100359583	3.91783e-72	1.00696			Pebp1	7.22413e-66	1.02587				H3f3c	1.58127e-138	0.766647
	Guca1a	2.77314e-69	-0.524155			Atp5if1	1.49957e-41	1.01466				Lix1	8.11134e-46	0.763983
	Dmd	5.01466e-67	-0.573936			Ubap1l	2.18012e-47	1.00699				LOC100911295	1.35797e-100	0.735118
	Add1	1.05803e-65	-0.952038			Ndufb9	9.16084e-53	1.00659				Kremen1	3.63794e-39	0.703982
	Pax4	1.1965e-65	-1.21033			LOC103689961	3.15435e-35	1.002				Ptprn	5.72748e-43	0.698488
	Grk1	6.97516e-65	-0.996055			Mt-co2	1.72298e-147	0.993083				Meis2	1.83759e-39	0.693542
	Fabp5	5.13785e-64	0.955907			Uba52	5.83916e-66	0.983784				Klhl29	1.95385e-65	0.691559
	Ptms	1.12696e-63	1.12197			Ndufa4	1.50305e-95	0.968811				Flot2	2.49072e-35	0.676123
	Dlg1	5.73704e-62	0.897011			Mt-nd2	5.29797e-109	0.966632				Msrb2	1.9082e-41	0.675102
	Zfp385b	8.33465e-62	1.2235			Mgst3	7.52528e-34	0.962276				Camk2b	4.7776e-41	0.673206
	Tmsb4x	6.41896e-59	1.05088			Mettl7a	1.26184e-30	0.958736				Aph1b	1.2002e-38	0.672449
	Tma7	8.45582e-59	0.544018			Khdrbs3	2.89556e-27	0.955434				Ckb	1.54249e-76	0.670963
	RGD1597339	3.88821e-58	-0.850333			Mt-nd6	1.33531e-28	0.951969				Ywhaq	1.34491e-51	0.670933
	Rtbdn	7.84931e-58	-0.627348			Lix1	3.18241e-32	0.942608				Cox8a	3.07517e-92	0.670922
	Mt-cyb	1.45923e-56	0.843908			Ssbp4	2.16531e-29	0.907953				Rnpep	4.31295e-42	0.6652
	Map1b	4.13918e-56	0.500664			LOC100361457	1.88426e-37	0.902469				Eml2	2.09195e-36	0.658946
	Prdx2	8.19809e-56	0.912773			Atp5mg	6.92809e-36	0.864868				Snca	7.81739e-61	0.658723
	Kdm4c	1.40338e-55	-0.670146			Dennd4a	7.30288e-33	0.858084				Selenom	4.17421e-40	0.655607
	Slc6a6	1.94159e-55	-0.84468			Mt-cyb	2.25892e-113	0.850124				Dennd4a	2.2528e-59	0.654157
	Mt-nd4	8.28443e-55	0.967254			Ddah2	1.0135e-24	0.840623				Pkig	2.61007e-54	0.646339
	Hcn1	9.22956e-54	-0.545106			Rps6ka2	5.18729e-28	0.83097				Zfp385b	2.66891e-31	0.634367
	Pebp1	3.5742e-53	0.840899			Ywhaq	1.81243e-29	0.829109				Car10	2.61744e-37	0.634158
	Cd47	1.66631e-52	0.997589			Rps18l1	5.22093e-29	0.808643				Rtn1	1.11229e-35	0.632904
	Cdhr1	4.31141e-52	0.799694			Fth1	5.15976e-48	0.807485				Atp5mc2	1.75986e-58	0.630809
	Stkld1	6.73917e-52	-1.12404			Acsl3	4.04306e-24	0.796219				Ssbp4	8.99451e-35	0.628403
	Gnb2	3.94757e-51	1.12789			Psme1	3.39801e-24	0.793665				Rasip1	2.51418e-34	0.626613
	Ywhaq	8.93753e-51	0.900375			Gpx4	2.4961e-47	0.785955				Mgst3	9.366e-35	0.62141
	Pkig	1.106e-49	0.835104			Cd63	5.67474e-23	0.781177				Cd63	6.84761e-33	0.604954
	Herc3	5.50971e-49	-0.870438			Dctn3	1.94796e-21	0.780825				Hadh	8.2207e-31	0.604098
	Uba52	6.29137e-49	0.775843			LOC100359583	3.58592e-28	0.777979				Mt-co1	4.27517e-104	0.593702
	Rpl41	6.82034e-49	0.723143			Cox6c	1.81665e-26	0.777755				Ift57	1.55556e-32	0.589445
	Ush2a	3.43264e-48	-0.512759			Rpl29	1.95896e-25	0.775326				Zfp36l2	1.87222e-34	0.586365
	AABR07044408.1	8.21105e-47	-1.0634			Tmem59	1.67244e-22	0.758729				Dlg1	3.88167e-58	0.58286
	Mt-co3	5.2768e-46	0.683618			Cox5b	1.10111e-22	0.755385				Ccnd2	5.06598e-29	0.57608
	Park7	9.1683e-46	0.798814			Eml2	2.08139e-20	0.755259				Cpne8	1.10717e-29	0.571129
	Ptprn2	1.27894e-45	1.15822			Park7	1.29487e-28	0.752869				Sord	1.37552e-27	0.569825
	Aldoc	2.49824e-45	0.786138			Ndufb8	2.35013e-25	0.747767				Mest	3.40196e-26	0.565374
	Mt-atp6	3.52117e-45	0.730633			Mxra7	5.89874e-23	0.747321				Junb	4.95747e-19	0.562982
	LOC103689961	6.27034e-45	0.892137			Pmm1	1.8239e-21	0.743674				LOC103689961	1.59256e-30	0.558442
	Klhl29	3.03933e-44	0.809927			Rps9l1	1.54573e-20	0.743178				Srrm4	2.37998e-35	0.555676
	Cox6c	1.28833e-43	0.86353			LOC100363268	9.21065e-18	0.740998				Aven	4.93005e-26	0.552753
	Ptprn	6.66607e-43	0.957544			Atp5pd	4.0543e-19	0.740832				AABR07033882.1	3.00685e-24	0.548792
	Cntn4	1.77776e-42	1.03387			Fgf2	2.32077e-20	0.737022				Rabgap1l	2.41901e-23	0.5486
	Slc4a7	3.20146e-42	-0.909326			LOC108351137	3.32881e-38	0.729828				Psme1	3.27707e-28	0.546961
	Atp5if1	1.05807e-41	0.819545			Eif5a	3.19134e-23	0.725603				Fgf2	2.63318e-28	0.54679
	Lnx1	7.18061e-41	0.939522			Snca	1.3002e-23	0.720228				P3h3	1.33054e-26	0.544149
	Atp6v0c	1.65214e-40	0.635064			Pkig	3.0264e-25	0.720099				Hist1h2bcl1	1.93897e-24	0.541462
	LOC100361457	1.46215e-39	0.691695			Ntan1	1.27165e-17	0.712872				Pebp1	1.344e-47	0.532511
	Atp5mc2	1.63201e-39	0.743774			Thra	5.56193e-22	0.707431				Ddah2	1.62632e-24	0.532005
	AC128960.1	2.07597e-39	0.704008			Atp5mc3	1.9015e-15	0.707223				Prdx2	3.76417e-38	0.525972
	Khdrbs3	4.82824e-39	0.866768			LOC103693430	1.72057e-18	0.706053				Mgat4a	4.93367e-21	0.521768
	Rpl23	2.08025e-38	0.735762			Bsg	6.61666e-26	0.703549				Arl6ip5	3.93535e-25	0.515452
	Cox4i1	3.64995e-37	0.672531			Fmc1	4.81816e-18	0.702475				Litaf	3.0743e-23	0.514347
	Crb1	4.84576e-37	-0.79596			Rps16	1.02333e-17	0.700599				AABR07063901.2	1.25275e-28	0.514135
	AABR07035916.1	8.8533e-37	1.01177			AABR07068955.1	9.05679e-16	0.697456				Plekhb2	6.55541e-25	0.513466
	Mast2	3.62156e-36	-0.790274			AABR07071891.2	1.65326e-17	0.695591				Tmem38b	1.97769e-23	0.506523
	Stard7	1.37281e-35	-0.678106			Rabac1	2.30078e-23	0.694369				Fabp5	2.05227e-35	0.501078
	Rps18l1	2.47928e-35	0.72643			Adamtsl4	1.16098e-18	0.69418				Ahr	2.08979e-24	0.498076
	AABR07026641.1	6.07409e-35	-1.07907			Ndufs5	2.05984e-13	0.686424				Pmm1	5.33333e-29	0.491914
	Atp5mg	9.97181e-35	0.730048			Mdh1	3.7723e-26	0.685386				Ndufb8	8.75303e-28	0.485092
	Osbp2	1.33796e-34	-0.497112			Atp5f1d	1.7737e-19	0.682599				Gabarapl2	3.48626e-30	0.484704
	Ubap1l	3.82502e-34	0.699419			Hint1	1.65142e-19	0.676335				Rcan1	1.33989e-18	0.482269
	Pla2r1	4.28443e-34	-0.726276			Atp6v0c	1.36932e-32	0.675851				Odc1	1.0734e-20	0.479362
	Tsks	8.28092e-34	-0.75027			Aldoc	2.13058e-21	0.675303				Cxxc5	9.77236e-22	0.476572
	Snca	1.17632e-33	0.663117			Rpl23	3.79339e-18	0.673507				Grsf1	1.05873e-23	0.476089
	Ahr	1.40131e-33	0.768502			Rps27a	4.96315e-16	0.672705				Dnajb2	2.9827e-25	0.473609
	Hist1h2bcl1	1.76668e-33	0.804845			Rpl41	6.54341e-43	0.671188				Stat3	3.59223e-21	0.472483
	Glmn	4.44741e-33	-0.894932			Rpl14	1.79525e-26	0.670521				Ubap1l	4.10776e-33	0.471184
	Kcne2	4.95364e-33	-0.926135			Aven	1.94793e-17	0.663002				Jun	2.03632e-13	0.468766
	Msh5	1.58354e-32	-0.906072			Hprt1	1.64082e-18	0.655305				Cacna2d1	7.55983e-21	0.466382
	Cd63	1.8595e-32	0.808155			Prdx1	1.42294e-13	0.654902				Lad1	1.60853e-20	0.462091
	Stat3	3.0508e-32	0.801746			Myl12b	6.77822e-14	0.644489				Nap1l1	4.00097e-21	0.46112
	Rps27a	5.05939e-32	0.752847			Rpl15	4.49438e-22	0.642224				Prdx1	1.03949e-20	0.45068
	LOC100363452	9.29895e-32	0.681531			Stmn3	1.68864e-13	0.642133				Plekha8	2.91338e-18	0.448609
	Junb	2.83653e-31	0.97669			Tmem160	1.53529e-15	0.638604				Plekhb1	9.28291e-30	0.44677
	Zdhhc12	4.23605e-31	0.793172			Gabarapl2	4.90163e-20	0.636844				Tmod1	1.88284e-20	0.444384
	Thra	4.2546e-31	0.807247			RGD1562420	9.82373e-19	0.636242				Impdh1	1.79185e-36	0.443734
	Mxra7	6.09723e-31	0.673188			Ift57	1.07559e-12	0.635006				Hs6st1	1.70716e-17	0.439826
	Flot2	3.40389e-30	0.835553			Plekhb2	9.12215e-13	0.63462				Oxct1	1.66296e-17	0.439508
	Slc25a30	4.4744e-30	0.858021			Tspan17	5.78741e-13	0.628585				Arf5	4.40882e-23	0.436646
	Mt-nd3	6.96945e-30	0.766739			Rps10l1	2.21901e-15	0.626658				Park7	1.16725e-27	0.434948
	Trove2	7.42767e-30	-0.831576			Ctnna1	3.83718e-15	0.621099				Letm2	1.68447e-18	0.425906
	LOC100363268	1.10546e-29	0.685714			Itm2b	2.35005e-22	0.620696				Phf20	7.77654e-18	0.425133
	Oscp1	4.24861e-29	0.58483			Stat3	1.79765e-14	0.62007				Pink1	7.83545e-18	0.423048
	Samd4a	6.4665e-29	0.750764			Arf5	3.21473e-14	0.618648				Rps6ka2	1.28761e-23	0.420383
	Tulp1	6.9139e-29	-0.343698			Cdc42	6.87371e-18	0.618574				Sdcbp	1.29148e-16	0.418986
	Rsrp1	8.18168e-29	-0.417331			Cisd2	4.21535e-13	0.616741				Rad9b	3.48055e-17	0.417476
	Smarcd1	1.30452e-28	-0.799876			Arl6ip5	1.12514e-11	0.616552				Cuedc1	1.93487e-18	0.417369
	Fgf2	1.88603e-28	0.757454			Cacna2d1	3.52356e-15	0.615854				Prtg	1.34923e-14	0.416612
	Kremen1	2.2286e-28	0.737326			RT1-A1	1.08889e-12	0.615465				Gpi	1.63304e-20	0.415854
	Cacna1f	3.18139e-28	-0.661882			Nap1l1	7.13817e-13	0.612752				Ndufa4	6.37991e-48	0.415467
	Rims2	5.71894e-28	-0.446903			LOC691807	1.46447e-14	0.610189				Pde4b	1.23043e-17	0.413234
	Crym	5.8625e-28	-0.815651			Rps4x-ps9	2.8682e-15	0.607808				Rps16	1.16418e-21	0.411861
	Rs1	6.65333e-28	-0.7009			Mt-nd1	2.80516e-43	0.606213				Cox6c	2.57499e-21	0.405904
	Uckl1	8.23032e-28	-0.830489			Oaz1	7.5072e-14	0.60582				Sla2	1.33391e-17	0.402988
	Pmm1	9.18119e-28	0.620638			Canx	3.23756e-12	0.604809				LOC100363452	1.7454e-19	0.398077
	Plxna2	1.56294e-27	-0.811134			Impdh1	2.11355e-19	0.600732				Samd4a	7.07133e-21	0.39643
	Fam57b	2.34823e-27	-0.489751			Map1lc3a	1.35375e-12	0.598412				LOC100363268	4.811e-18	0.396158
	AABR07007642.1	2.38685e-27	-0.607108			Gtf2h5	5.61489e-13	0.598213				Klhdc8b	3.91856e-14	0.395867
	Ubc	3.26561e-27	0.575193			AC128960.1	3.20152e-20	0.596362				Slc25a4	1.57307e-24	0.394308
	LOC100362027	3.30378e-27	0.591506			Mrps25	3.94082e-12	0.59611				Uba52	2.35678e-27	0.393523
	LOC108351137	8.17089e-27	0.531624			Rpl18	1.05084e-13	0.594525				Vps39	1.9645e-17	0.392915
	Ndufb11	1.65511e-26	0.580282			Mrpl54	7.42457e-11	0.593655				AABR07071891.2	2.08135e-15	0.392909
	Gabarapl2	1.88232e-26	0.582747			Rnpep	3.33353e-14	0.591434				Clstn1	9.1212e-23	0.390311
	Prkca	3.71949e-26	-0.662333			Tspan9	8.25722e-15	0.590767				H3f3a	8.20749e-79	0.388431
	Odc1	4.03661e-26	0.635383			Dnajb2	1.7945e-13	0.586173				Hprt1	2.80273e-24	0.387564
	Nme2	6.72306e-26	0.677971			Ahr	2.74209e-11	0.580676				Rpl17	3.48518e-18	0.386109
	Wdr89	8.13363e-26	-0.837882			Rps3	2.67324e-19	0.580263				Cbx3	2.24115e-15	0.38371
	Cox5b	1.08614e-25	0.600066			Hist1h2bcl1	4.86121e-09	0.577031				Jpt1	8.7136e-16	0.38219
	Srsf7	1.2633e-25	-0.533671			Plekha8	5.90765e-10	0.575962				Adpgk	8.80549e-15	0.381086
	Oxr1	1.30237e-25	-0.611559			Snrpd2	2.9441e-11	0.574102				Ache	4.39257e-14	0.380304
	Plekha8	1.37649e-25	0.760821			Ap2m1	1.01517e-13	0.57317				Sez6	1.43655e-13	0.376512
	Rps29	1.51732e-25	0.652998			Slc25a4	1.12257e-16	0.573103				Txn2	1.74433e-16	0.373041
	Sdcbp	2.38478e-25	0.6549			Srrm4	1.09453e-10	0.571994				Atp5mc3	1.09069e-16	0.37188
	AC094217.1	2.39308e-25	0.562545			Sncb	5.80524e-17	0.570286				Clvs1	1.47198e-09	0.370136
	Sag	2.75832e-25	-0.252936			Rpl32.1	3.69342e-14	0.566666				Pgrmc1	2.0097e-16	0.369832
	Rabac1	5.493e-25	0.52167			Atp5po	1.68827e-12	0.566084				LOC100363469	1.53265e-16	0.369596
	Wdr17	7.36081e-25	-0.475316			Hsp90ab1	1.3366e-13	0.563786				Lmbrd1	5.06665e-16	0.368787
	Rpl32.1	7.38245e-25	0.566797			LOC301124	2.58581e-11	0.562824				Pcare	4.41642e-18	0.367842
	Mt-nd1	7.46858e-25	0.532565			Ndufb11	9.06938e-14	0.561498				LOC100365839	1.73114e-19	0.367594
	Gucy2f	1.12298e-24	-0.624986			Ghitm	9.44661e-14	0.561154				Ankh	2.83184e-12	0.367312
	Acyp2	1.12838e-24	-0.748518			Tmem38b	9.08839e-12	0.560002				Ppp1cc	7.46088e-24	0.366774
	Asap2	1.90998e-24	0.684678			Ypel3	5.15859e-14	0.555773				Ndufb9	4.11319e-19	0.366216
	Arl6ip5	2.07267e-24	0.635843			LOC100362027	5.15063e-15	0.555101				Nfasc	6.4509e-15	0.365084
	Atp5f1d	2.2059e-24	0.557043			Spint2	6.90801e-16	0.554783				AABR07019341.1	5.85682e-15	0.363916
	Rnpep	2.44233e-24	0.606822			LOC100362830	2.2046e-14	0.553465				Ccng1	4.03352e-15	0.361938
	Gpx4	2.616e-24	0.481572			Phpt1	4.84701e-11	0.548962				Tmem9	2.87157e-16	0.354384
	Nap1l1	2.63787e-24	0.590828			Clstn1	1.98868e-15	0.547694				RGD1304622	9.36525e-13	0.353528
	AABR07033882.1	3.18593e-24	0.984136			Dlg1	5.6002e-17	0.546141				RGD1562420	1.50929e-14	0.352783
	Uxt	7.23874e-24	-0.686706			Rtn1	5.5615e-11	0.545433				Atp5mg	3.98454e-20	0.352529
	Aven	7.73272e-24	0.612092			Fabp5	4.94463e-13	0.544723				Krcc1	1.04809e-13	0.351992
	Mgat4d	8.35445e-24	-0.837114			Selenok	1.04377e-13	0.543723				Atp5if1	6.88765e-17	0.351538
	AC141489.1	8.62922e-24	0.621749			Jpt1	7.1098e-11	0.542826				RGD1565616	7.34528e-12	0.350404
	Ldha	1.40774e-23	0.329009			Ralgps1	1.60271e-09	0.541525				LOC100360846	1.40441e-14	0.350007
	Raly	2.99606e-23	-0.452854			Gngt1	4.23375e-111	0.539709				Egflam	7.47364e-24	0.348842
	Mest	4.95752e-23	0.713245			Cfl1	1.61432e-12	0.538425				Rab30	3.11256e-12	0.347042
	Rtn1	6.10883e-23	0.603212			Mtch1	5.93916e-12	0.536813				Ptp4a3	3.42997e-19	0.344076
	2022-03-01	6.848e-23	-0.668468			Guk1	8.17845e-13	0.532472				Cox4i1	1.44335e-21	0.34405
	Rpl17	6.95852e-23	0.606088			Nop10	1.33192e-09	0.53056				AC094217.1	8.00387e-16	0.344004
	Rps6ka2	8.07054e-23	0.521381			LOC100361934	2.98497e-09	0.5305				Mgarp	3.24994e-16	0.343769
	Ssbp4	1.35232e-22	0.608435			Tmem9	5.04148e-11	0.52995				Phyh	1.79295e-13	0.342787
	Cdc42	1.41463e-22	0.490117			Rplp0	3.17027e-23	0.529312				Sgpp1	3.25086e-14	0.342045
	Dnajb2	1.98415e-22	0.574762			Atp1b2	2.2625e-16	0.52821				Cisd1	6.63385e-16	0.34115
	Sntb2	2.24152e-22	-0.590637			LOC100360117	3.32232e-13	0.527829				Rasa3	1.70733e-12	0.33881
	Guca1b	2.83821e-22	0.335302			Fkbp3	6.06028e-10	0.527777				Mxra7	6.80121e-14	0.338553
	LOC103693430	2.84502e-22	0.604116			Retreg2	1.56467e-09	0.526716				Fth1	1.96979e-23	0.337847
	Bsg	3.53139e-22	0.456699			Uqcrb	3.45688e-08	0.525881				Acss2	1.11628e-12	0.337686
	Nop10	3.58676e-22	0.633156			Dach1	3.06357e-10	0.524412				Ralgps1	1.29352e-10	0.334159
	LOC100363469	1.42595e-21	0.579518			Rpsa	8.56912e-12	0.522496				Fkbp3	4.78602e-11	0.333767
	Grsf1	1.4377e-21	0.607377			Klhl29	1.41172e-16	0.520899				Atp5f1b	6.25991e-19	0.333332
	Eml2	1.47713e-21	0.642727			Uqcr10	3.06836e-11	0.520016				Tspan7	3.21449e-11	0.331614
	Fth1	1.51392e-21	0.506887			Vdac2	4.0314e-13	0.515772				Fscn2	6.46967e-16	0.331195
	LOC100362830	2.30492e-21	0.474481			Uqcrq	1.7643e-09	0.51454				Ndufs2	4.58831e-13	0.33033
	Uqcr10	2.36085e-21	0.591391			Atp5f1e	7.23482e-08	0.510964				Hikeshi	3.13435e-12	0.329816
	Gpi	2.65594e-21	0.56779			Pcbp4	9.77409e-23	0.509136				Sec14l2	2.77397e-11	0.327535
	AABR07068851.1	2.75887e-21	-0.589431			Ctsd	9.5285e-08	0.505363				Hibadh	9.43299e-12	0.326064
	Jpt1	3.04298e-21	0.581671			Aldoa	5.25627e-19	0.504087				Acat1	1.80122e-12	0.325239
	Abca4	3.13256e-21	-0.370605			Oscp1	2.34868e-14	0.501991				Dctn3	9.66333e-14	0.324005
	RGD1309540	3.51906e-21	-0.73727			Yeats4	1.24474e-09	0.501324				Prnp	1.0958e-23	0.323914
	Fam53b	3.6842e-21	-0.634012			Glo1	1.40562e-08	0.499904				Tp53i3	1.33485e-10	0.322715
	AABR07044711.1	7.54695e-21	0.435157			Serf2	1.15653e-11	0.498851				Dctn1	4.57089e-13	0.321736
	Arf5	1.61527e-20	0.536278			Ap2s1	1.49561e-08	0.498622				Fmc1	6.05998e-12	0.320723
	Eif5a	2.31486e-20	0.529499			Atp6v1g1	1.08374e-10	0.495011				Nop10	3.06155e-13	0.320575
	LOC100360841	3.17516e-20	0.591838			Atp6v0b	5.81829e-15	0.494402				Vdac1	3.22906e-14	0.320086
	AABR07071891.2	3.4067e-20	0.554545			Flot2	1.68183e-09	0.492602				Rps10l1	4.46703e-14	0.318636
	Slc25a4	4.37629e-20	0.455629			Tbca	8.47783e-10	0.492408				LOC100362830	2.69772e-13	0.318324
	Atp8a2	4.40637e-20	-0.55569			Uqcrb.1	8.8715e-11	0.490659				Rpl23	1.08193e-15	0.317997
	LOC691807	6.09789e-20	0.574452			Nedd8	8.5757e-09	0.489742				AABR07072400.1	3.35335e-10	0.317028
	AABR07059168.2	6.51011e-20	0.49472			Cox7a2	9.29972e-10	0.489089				Tmem50a	3.37783e-12	0.316726
	Ift57	8.17174e-20	0.567332			Dbndd2	1.94665e-08	0.484025				Tex2	1.76896e-11	0.316223
	Impdh1	1.33019e-19	0.431051			Thsd7a	8.58878e-10	0.483562				Hist3h2ba	4.29123e-11	0.315594
	Sh3gl2	1.40821e-19	-0.545681			LOC100911295	3.42237e-15	0.48216				Prom1	6.67575e-18	0.315497
	Rps10l1	1.58998e-19	0.505013			AABR07063901.2	2.50827e-08	0.481281				Tex9	1.63355e-09	0.314227
	Rorb	1.70287e-19	0.510961			Acat1	3.92073e-09	0.479482				Pigp	1.07618e-11	0.313455
	Ndufb9	1.86636e-19	0.467783			Pigp	1.5776e-08	0.479409				Amotl2	1.77535e-11	0.311055
	Prdx1	1.86772e-19	0.563572			Prdx5	2.97635e-09	0.478824				Esd	3.05363e-11	0.310797
	Fam161a	2.33894e-19	-0.657322			Rpl36al	7.64138e-10	0.477176				RGD1563680	4.36778e-10	0.309206
	Celf2	2.39585e-19	-0.393933			LOC100360846	4.53811e-08	0.476647				Nsd1	2.13005e-12	0.309157
	Hint1	2.64725e-19	0.491717			Fis1	1.90216e-08	0.476606				Tsc22d1	8.46359e-14	0.308575
	Hook1	2.78415e-19	-0.641423			Pdzd8	8.37732e-08	0.476417				Cfap20	1.11269e-13	0.30818
	Litaf	2.84564e-19	0.583877			Oxct1	1.07859e-10	0.476387				Atp5f1d	2.08684e-12	0.307549
	Crot	3.2199e-19	0.496322			LOC100360841	1.12563e-07	0.476018				Eef2	4.19729e-12	0.306812
	Fmc1	3.85322e-19	0.477964			Lnx1	1.98601e-08	0.474201				AC134224.3	1.72363e-89	0.302793
	Ctnna1	4.10227e-19	0.517436			Mgarp	2.64071e-10	0.471648				Dach1	8.41886e-09	0.302538
	Atp6v1g1	5.82023e-19	0.424913			Ppp1cc	5.02037e-10	0.471188				Cotl1	1.09686e-09	0.302389
	Uqcrb	8.02503e-19	0.548488			Ndufa13	2.5186e-08	0.469703				Fam104a	2.33269e-12	0.301926
	LOC297756	1.01717e-18	0.545702			Grsf1	1.23825e-09	0.469033				Cmtr1	3.08424e-11	0.300659
	Srsf2	1.23288e-18	-0.454482			Sertad1	1.56162e-09	0.46702				Klc3	7.15036e-11	0.298172
	Hibadh	1.36617e-18	0.468476			Rpl19	2.02157e-11	0.466619				LOC100359583	3.28186e-14	0.296178
	Ric8b	1.89965e-18	-0.640176			Mrpl20	1.97023e-08	0.466565				Mtch1	4.80861e-12	0.295286
	Tmem138	2.39377e-18	-0.701611			Scg5	1.2321e-14	0.466429				Klf9	7.82396e-10	0.295065
	Apbb1	2.76755e-18	0.535287			Zfp385b	2.19267e-08	0.466214				Slc9a8	4.12491e-10	0.294344
	Mdh1	2.80799e-18	0.424268			Ube2m	2.02166e-09	0.463519				Atp6v0d1	1.8084e-12	0.293298
	Ntan1	3.8401e-18	0.512614			LOC100365839	3.16742e-09	0.462917				Dnaja1	2.34883e-10	0.293068
	Rps15	4.50044e-18	0.50103			Fbxo6	1.37091e-08	0.461228				Magi1	5.84394e-11	0.292762
	Hs6st1	4.51946e-18	0.570548			Ctsl	4.1046e-07	0.45898				Rpl29	1.37564e-13	0.29265
	Atp5f1b	4.7552e-18	0.412017			Timm13	2.58823e-09	0.457436				Ube2e3	4.7158e-11	0.292342
	B3gat3	6.09956e-18	0.478609			AABR07034315.1	3.51158e-07	0.457363				Rpl32.1	6.02278e-13	0.291131
	Pla2g4c	7.53348e-18	0.730404			Mt-co3	2.69561e-51	0.457127				AABR07054400.1	8.56974e-10	0.290909
	Tax1bp1	7.81701e-18	0.393796			Ldhb	8.4935e-08	0.456631				LOC100361025	8.45373e-13	0.289384
	Rpl27	1.16248e-17	0.515154			Phyh	1.49711e-07	0.456578				Cdhr1	1.06514e-18	0.287928
	Ndufs5	1.21862e-17	0.455789			LOC690468	7.67076e-07	0.455682				Ndufa8	1.84595e-11	0.28737
	Atp2b1	1.31193e-17	0.4627			Capzb	4.90285e-07	0.454904				Ldhb	2.86694e-11	0.28727
	Cdc23	1.34798e-17	-0.649249			LOC687780	1.0911e-08	0.454137				Lpcat2	9.26443e-11	0.28575
	Tmem160	1.47853e-17	0.531219			Cisd1	8.45712e-09	0.453912				Rorb	9.76591e-11	0.285464
	Unc13b	1.55666e-17	-0.563942			Uqcr11	1.33081e-06	0.453595				Atp5pf	4.38689e-10	0.284697
	Mpp4	2.37699e-17	-0.57238			Atp5f1b	1.17095e-12	0.453348				Col5a3	5.41949e-11	0.284394
	Nedd8	2.9475e-17	0.482994			Rps24	4.92319e-06	0.451849				Uqcrfs1	1.4528e-10	0.2839
	Fam104a	3.08311e-17	0.48378			Grtp1	1.88707e-07	0.45049				Eif4h	9.03199e-11	0.283604
	Ndufa2	3.14444e-17	0.457391			Btg2	3.60739e-08	0.449723				Tmem160	1.92259e-10	0.283107
	Tmod1	3.59884e-17	0.490315			Mien1	4.26388e-08	0.449539				Btbd3	1.34967e-08	0.282681
	Madd	3.71414e-17	-0.677479			Rpl11	2.0332e-07	0.448992				Acadm	8.65804e-15	0.282353
	Klc3	3.91441e-17	0.474749			Gpi	1.15034e-08	0.448023				Hmgn2	2.33724e-24	0.281078
	Mkks	3.99538e-17	0.496991			Acss2	8.01549e-09	0.447813				Btg2	5.50725e-10	0.279627
	Cox6b1	5.51522e-17	0.511974			Klc3	2.14461e-07	0.447654				Ppp2r2b	1.35962e-34	0.278017
	Sord	6.22166e-17	0.538865			Calm3	4.32289e-06	0.447532				Yeats4	6.32083e-11	0.277405
	RGD1562420	6.57417e-17	0.421447			Suclg1	6.67757e-08	0.447512				Ndufa6	2.30421e-08	0.277358
	Mt-nd6	6.87e-17	0.490917			Tsc22d1	9.37071e-09	0.447331				Large1	5.67458e-11	0.276579
	Cisd1	7.87791e-17	0.411085			Slc22a17	2.09464e-08	0.447017				Eml6	1.09318e-08	0.274451
	Fam171b	8.22998e-17	-0.613145			Swi5	3.01835e-08	0.446422				Sdhc	1.15431e-09	0.27403
	Nrl	8.55715e-17	-0.580915			Atp5pf	4.15032e-07	0.444949				Nxnl2	5.10341e-16	0.274028
	Cisd2	8.58668e-17	0.472465			Ndufa7	1.67996e-06	0.444798				LOC689574	4.26576e-08	0.273939
	Igsf9	9.26359e-17	-0.611057			Fscn2	9.61103e-09	0.442456				Apbb1	2.14292e-07	0.273888
	Slc29a1	9.87148e-17	-0.689475			Acbd7	4.99712e-09	0.442448				Ctsl	4.26272e-08	0.272932
	Prom1	1.12113e-16	0.379943			Ndufa6	3.93955e-07	0.442313				Tmem205	4.58108e-09	0.270727
	Snrpd2	1.12445e-16	0.427391			Ccs	1.279e-07	0.442201				Mien1	1.4114e-08	0.269301
	Rpl29	1.15735e-16	0.44667			Tspan7	2.41362e-06	0.441941				Adamtsl4	1.83496e-09	0.269236
	Atp5mf	1.26545e-16	0.492832			Edf1	4.09061e-08	0.440337				LOC100361934	1.05052e-08	0.268318
	Cpe	1.66649e-16	0.378635			LOC680254	1.84433e-06	0.440132				Rpl18	9.44007e-11	0.267192
	Tmem116	1.70152e-16	-0.679379			Sod2	3.11149e-06	0.439919				Hint1	8.13028e-13	0.266282
	Hacd3	1.96235e-16	0.512052			Ran	7.70782e-07	0.438876				Cox5b	5.01527e-12	0.265366
	Smchd1	2.34348e-16	0.461587			Mdh2	2.42948e-07	0.438805				Cep104	6.22958e-09	0.265331
	Dctn3	5.32806e-16	0.416601			Tuba1a	9.43494e-10	0.438472				Wdfy3	4.94887e-09	0.265219
	Acadm	6.1595e-16	0.357556			Btbd3	2.4899e-06	0.436878				AABR07068955.1	9.40375e-09	0.265111
	Naaa	6.57827e-16	0.49971			Cox7b	9.36462e-08	0.436761				Rnh1	8.01523e-09	0.264632
	AABR07034315.1	8.34724e-16	0.496758			Atp6ap2	1.64216e-07	0.436428				Micu2	5.4203e-10	0.264539
	Pgam1	9.163e-16	0.41049			AC141489.1	2.87929e-08	0.435424				Elf2	3.01017e-08	0.264166
	Uqcrq	1.2014e-15	0.461042			Cdk5rap3	1.42802e-06	0.432898				Slc22a17	6.99026e-09	0.263831
	Cox7a2	1.37322e-15	0.406793			Tusc2	2.83569e-07	0.432878				Map1lc3a	1.52174e-09	0.263246
	Tomm20	1.39768e-15	0.403941			Cox6b1	1.54799e-06	0.432747				Rps4x-ps9	5.86425e-10	0.263141
	Kcnb1	1.53077e-15	-0.45556			Mt-nd5	2.65712e-06	0.431641				Hsp90ab1	3.23722e-08	0.262624
	Rasal2	1.81493e-15	0.418151			Ctsa	1.14471e-06	0.428558				Phf3	4.12097e-08	0.261893
	Plekhm3	1.91493e-15	-0.57221			Tomm20	4.02557e-07	0.428389				Unc79	4.1813e-08	0.261727
	Pigp	2.13594e-15	0.463771			LOC100361025	1.57721e-06	0.428326				AABR07031491.2	2.47491e-07	0.261286
	Atxn1	2.15746e-15	-0.480224			Hsp90b1	3.43136e-07	0.427543				Ndufa7	1.71658e-08	0.26112
	Rapgef5	2.27532e-15	-0.577377			Vamp2	8.22343e-09	0.427459				LOC691807	1.99025e-09	0.261109
	Ankrd33b	2.44208e-15	-0.475141			LOC100363452	5.21605e-09	0.426458				RGD1562987	3.22275e-11	0.260911
	Snap25	2.52798e-15	0.349016			Ap1b1	2.13925e-07	0.425106				Uqcr11	2.10061e-07	0.260519
	Hprt1	3.10276e-15	0.382002			Tmem218	6.89025e-07	0.42492				Atp6v0c	4.98831e-16	0.26021
	Slc31a2	3.23858e-15	-0.609973			Rpl24	2.17553e-07	0.423632				Cox5a	7.25327e-08	0.259988
	Rrp1b	3.42001e-15	-0.643048			LOC103690015	2.77942e-07	0.422242				Tmem145	1.92085e-09	0.259493
	Rabgef1	3.56298e-15	-0.613669			Dctn2	6.1364e-06	0.422153				Atp5pd	1.03144e-08	0.25932
	Pcdh15	3.67172e-15	-0.362789			Sumo4	2.07135e-06	0.421925				Tmem59	9.35555e-10	0.257795
	Purb	4.62456e-15	0.430918			Nadk2	5.57102e-06	0.42088				LOC100362027	1.10872e-11	0.257653
	Drd4	5.5868e-15	-0.609266			Lsm4	1.94734e-06	0.420054				Tmem222	1.77187e-08	0.257189
	Hdac9	5.9359e-15	-0.524732			Pgam1	3.64385e-08	0.418599				Prdx3	4.63946e-08	0.256937
	Pde6a	6.03767e-15	-0.263977			AABR07072400.1	0.000161223	0.418503				Ctnna1	6.17954e-09	0.256734
	Srsf6	6.60401e-15	-0.585193			Mt-atp6	1.25924e-58	0.418382				Mapk14	2.87951e-08	0.256556
	Tmem38b	6.75163e-15	0.470954			Vps28	2.19998e-05	0.417962				Kif2a	1.73177e-10	0.254893
	Lpcat1	8.16255e-15	-0.558794			Clta	1.07419e-17	0.417211				Snrpd2	2.2322e-09	0.254792
	Pbrm1	8.25987e-15	-0.546633			Ndufa8	2.21301e-06	0.414609				LOC100360117	4.61659e-10	0.254096
	Arpc3	8.42913e-15	0.441557			Esd	3.87396e-06	0.414574				Capzb	8.05739e-10	0.25371
	Cpt1a	1.24734e-14	-0.628219			Atp6v1f	1.90957e-05	0.414419				Cmpk2	1.2796e-07	0.252888
	AABR07036331.2	1.27983e-14	-0.591216			Scp2	3.50407e-08	0.413574				Lamtor1	1.5936e-07	0.252696
	RGD1562402	1.60327e-14	0.381586			Slc25a3	4.41285e-07	0.413503				Rabac1	2.14717e-11	0.25241
	Ndfip1	1.74771e-14	0.356966			Rabgap1l	4.75832e-06	0.41222				Eif5a	1.47512e-11	0.25133
	LOC301124	1.82318e-14	0.428783			Psma1	1.90655e-08	0.411934				St6galnac2	2.03961e-10	0.251041
	Dyrk2	2.0292e-14	-0.567721			Dynll1	6.81996e-11	0.410679				Rhpn1	2.11531e-08	0.250827
	Nim1k	2.29553e-14	-0.572923			Ufc1	1.02233e-06	0.409634				RGD1562136	5.64984e-08	0.250257
	AABR07068955.1	2.46311e-14	0.425673			Pgrmc1	7.56937e-08	0.408721				Cisd2	8.4534e-08	0.250153
	Myl12b	2.85572e-14	0.416867			AC120310.1	3.37509e-06	0.408317				Lurap1l	1.23836e-07	0.250105
	Mt-nd4l	3.01836e-14	0.451187			Uqcrh	8.15009e-09	0.407929				Kdm2a	4.06771e-05	-0.250717
	Ddx5	3.49695e-14	-0.266787			Ppdpf	6.31853e-06	0.407245				Arhgef26	2.54051e-05	-0.251814
	Tpt1	3.4972e-14	0.388968			Dnajc12	2.21873e-06	0.407112				Baz2b	1.41791e-06	-0.251842
	Lurap1l	3.97041e-14	0.420623			LOC100363469	3.85308e-05	0.406247				Slc25a33	9.8803e-08	-0.251883
	AABR07063901.2	4.08785e-14	0.470356			Eif1	2.89396e-15	0.404051				Atp8a2	3.76464e-10	-0.252564
	Dstn	5.0179e-14	0.409128			Set	1.13271e-06	0.403078				Cpt1a	7.35527e-07	-0.252707
	Cdk13	5.23114e-14	-0.521743			Eef2	8.11526e-06	0.402568				Stard10	2.79508e-05	-0.253765
	Acss2	5.85937e-14	0.506791			Dnajb14	1.34415e-08	0.402548				Tcf12	2.24697e-08	-0.255142
	LOC100910678	5.96074e-14	0.442313			Ssbp3	1.342e-05	0.400903				Slc24a1	3.29152e-08	-0.255683
	Rps16	7.95935e-14	0.38729			Cfap20	7.09751e-07	0.399528				Kdm3b	0.000245936	-0.256494
	Pgrmc1	8.28693e-14	0.430639			Map1lc3b	3.5106e-05	0.398275				Hsp90b1	1.46063e-05	-0.256601
	Rgs20	8.32219e-14	-0.477583			Psmb1	5.95472e-07	0.397993				Fbxl5	1.31668e-13	-0.256726
	Eif1	8.95975e-14	0.262868			Psph	7.06801e-07	0.397505				Sf3b1	3.65101e-07	-0.256746
	AABR07019341.1	1.00152e-13	0.418411			Myl6	9.45198e-06	0.397435				Atf2	7.13132e-05	-0.256956
	Kdm5c	1.28448e-13	-0.631163			Mrpl27	5.35634e-05	0.397406				Dhx36	2.31228e-06	-0.257157
	Spint2	1.39711e-13	0.358263			LOC498555	9.56868e-06	0.395058				Ddx3	3.64777e-05	-0.257221
	Atp5pd	1.4962e-13	0.435723			Mrps12	7.82692e-06	0.395042				Arhgap24	1.4049e-09	-0.257296
	Ndufa6	1.73542e-13	0.415026			Car10	1.93813e-06	0.394862				Xrn1	1.04692e-05	-0.257501
	Dad1	2.38128e-13	0.358664			Sgpp1	5.37438e-06	0.394836				Snrpd3	2.38116e-05	-0.258045
	LOC100360491	2.87486e-13	0.40461			Spcs1	3.32635e-05	0.394572				Cebpg	1.05404e-05	-0.258105
	Ndufb8	3.22346e-13	0.343941			Atp5f1a	6.01936e-07	0.394237				Sars	2.28668e-05	-0.258903
	Ccdc107	3.31107e-13	0.363461			Ndufb2	4.90726e-06	0.39259				Armc1	5.53148e-06	-0.259239
	Bbs9	3.33438e-13	-0.429462			Ndufs2	7.01107e-05	0.392292				Atrx.1	2.93757e-06	-0.260191
	Snx12	3.60403e-13	0.417978			RGD1562402	2.54669e-06	0.391337				Hnrnpm	0.000151542	-0.260368
	AABR07007675.1	3.78151e-13	0.393616			Rps11	2.2633e-06	0.391118				Kif3b	4.24424e-06	-0.260374
	Tspan3	3.89103e-13	0.353768			Polr2e	4.48454e-05	0.390613				Pnisr	9.22155e-08	-0.260653
	Ankrd11	3.94898e-13	0.397176			Dlg5	4.43077e-06	0.389875				Btd	4.80698e-06	-0.261431
	Ddrgk1	4.15525e-13	0.404678			Rps15	7.50111e-06	0.386509				Prkacb	1.78174e-05	-0.261676
	Ndufa7	5.54806e-13	0.404363			Pop5	3.95922e-06	0.385854				Phlpp1	1.82016e-05	-0.262133
	Rps8	5.59933e-13	0.376197			Cuta	5.32037e-06	0.385099				Ankrd33b	1.05993e-07	-0.263184
	Arl6ip1	6.98464e-13	0.371081			Unc119	1.33301e-24	0.385072				Bbs9	5.78256e-12	-0.263445
	Sgpp1	8.02597e-13	0.442494			Tma7	4.2843e-31	0.384246				Crot	4.72258e-05	-0.265141
	Cox7b	9.14688e-13	0.413882			RGD1311703	2.93416e-06	0.383406				Alms1	5.32928e-06	-0.265193
	Ndufb2	9.33572e-13	0.403316			Rpl22	3.66298e-05	0.382328				Phf8	1.65065e-05	-0.265494
	Col5a3	9.57038e-13	0.363686			Prnp	9.62897e-08	0.381833				Ublcp1	1.79305e-06	-0.265711
	Map1lc3a	1.01361e-12	0.391314			Rpl7	7.0417e-09	0.381242				Snapin	7.35791e-06	-0.266265
	Acat1	1.03811e-12	0.395346			Cst3	3.42723e-08	0.379008				Fmr1	4.54465e-06	-0.267725
	Arhgap24	1.10381e-12	-0.379079			Tspan3	5.83757e-07	0.378856				Snx29	6.37139e-05	-0.267918
	Plekhb2	1.19714e-12	0.405899			Limch1	4.76437e-08	0.378775				Ktn1	2.04971e-06	-0.268571
	Mgarp	1.24367e-12	0.321001			Naa38	5.14205e-05	0.378112				Eif2s2	1.25313e-05	-0.268617
	Fbxl5	1.3042e-12	-0.273176			Aipl1	5.19442e-17	0.377464				Ddx3x	6.57552e-06	-0.268819
	Cngb1	1.44426e-12	-0.293523			Col5a3	1.27196e-06	0.376851				Lrguk	1.91289e-06	-0.270483
	Mars	1.53921e-12	-0.592224			Arl6ip1	2.03724e-05	0.372658				Celf2	7.43572e-15	-0.270586
	Plk5	1.58866e-12	0.418022			Pea15	8.71177e-06	0.372176				Fam120a	2.96598e-05	-0.272003
	Gadd45a	1.75802e-12	0.426559			Atp6ap1	0.000442056	0.372119				Hipk2	0.000185663	-0.272199
	Ccnd2	1.79717e-12	0.4913			Lamtor5	2.92404e-05	0.370726				Ddit3	1.469e-07	-0.273836
	Aplp2	2.27685e-12	0.325772			Lamtor4	4.20683e-05	0.370628				Acsl6	2.45398e-12	-0.274034
	Uqcrb.1	2.35978e-12	0.334613			AC094217.1	6.94759e-07	0.37006				Memo1	3.20458e-07	-0.275586
	Rdh11	2.44375e-12	-0.454006			AABR07035539.1	0.000159457	0.369012				Klhl12	3.9865e-06	-0.275862
	Pde4b	2.57033e-12	0.463955			Arpc1a	8.71527e-06	0.369				Pdc	1.08164e-61	-0.276701
	RGD1563888	2.69276e-12	-0.551347			Cyc1	1.52732e-05	0.368467				Gnb5	6.34005e-07	-0.276818
	Srrm4	2.98843e-12	0.35201			Psap	2.81328e-05	0.367546				Vmp1	1.96024e-08	-0.276935
	Cers4	3.26567e-12	-0.432686			Trappc3	0.000213997	0.366374				Ammecr1	2.39039e-05	-0.277203
	Rgs22	3.34385e-12	-0.534424			LOC103694169	7.60707e-05	0.36591				Trps1	5.07045e-06	-0.277442
	LOC103694169	3.55613e-12	0.38157			LOC100364457	1.22775e-07	0.36556				Trafd1	5.1307e-07	-0.278033
	Cds1	3.82564e-12	-0.382118			Bcap31	0.000206794	0.365409				Grina	7.06862e-09	-0.278398
	Atp5pf	4.1355e-12	0.365118			Hmg20b	3.83136e-05	0.365094				Wnk1	5.09762e-06	-0.279255
	Asns	4.41681e-12	-0.600713			Sem1	7.1535e-06	0.36384				AABR07026291.1	9.81626e-06	-0.279781
	LOC100361934	4.53187e-12	0.405319			Odc1	0.000211458	0.363634				Csnk1e	9.82661e-06	-0.280683
	Stmn3	5.02284e-12	0.397217			Tpt1	6.54172e-10	0.363128				Ythdc1	4.39501e-06	-0.281679
	Cbx3	5.36842e-12	0.369487			Pcare	8.17319e-06	0.362163				Hnrnpf	5.63762e-06	-0.283206
	Cep290	5.57084e-12	-0.364929			AABR07044711.1	1.66501e-08	0.361555				Nptn	7.33629e-11	-0.283698
	Rpl24	6.41017e-12	0.368984			Ndfip1	1.98394e-08	0.360928				Ppp1r9a	8.8472e-06	-0.283795
	Calm2	6.42882e-12	0.392892			Rab11b	0.000125394	0.359923				Ahcyl1	1.27804e-07	-0.284616
	Sec62	6.45175e-12	0.347545			AABR07059168.2	9.01971e-06	0.357253				Lnpk	3.12364e-07	-0.285626
	Mlf2	7.40762e-12	0.381181			Emc7	1.24374e-07	0.356683				Cnga1	2.71396e-09	-0.285697
	Canx	7.4784e-12	0.344529			Sub1	0.000175021	0.35633				Ogt	8.97099e-09	-0.286311
	Setbp1	7.96242e-12	-0.596117			RGD1565989	0.000127022	0.356322				Ush2a	9.46956e-26	-0.286813
	Gpm6b	8.04674e-12	-0.558284			Aplp2	1.60429e-05	0.355817				Ddx17	2.34276e-06	-0.288116
	Aplf	8.3233e-12	0.38616			AABR07058441.1	1.88295e-05	0.355665				Ppargc1a	9.91126e-06	-0.288385
	Timm8b	1.01167e-11	0.32929			Zfp444	0.000307037	0.355563				Gapvd1	5.76875e-06	-0.289642
	LOC100360573	1.13672e-11	0.395747			Ppa1	1.02699e-05	0.355351				Zfp566	1.20941e-07	-0.289773
	Ndufs2	1.31802e-11	0.339671			Taldo1	5.43684e-05	0.355057				Ak2	2.81478e-07	-0.290354
	Dgke	1.37695e-11	-0.509999			Ddrgk1	1.73835e-06	0.35491				Nars	2.63153e-08	-0.290552
	Ccng1	1.48833e-11	0.355877			Cct7	4.50597e-05	0.353884				Sycp1	3.60291e-07	-0.291068
	Pnisr	1.53186e-11	-0.42621			Ndufb7	0.000151639	0.353486				Hnrnpu	1.09254e-07	-0.291381
	Mt-nd5	1.53202e-11	0.385359			Cstb	7.98308e-05	0.35321				Grb10	1.57716e-06	-0.291701
	Rpl35	1.6072e-11	0.337908			Nxnl2	1.1808e-09	0.352546				Pomt2	1.71798e-07	-0.292185
	Calm3	1.70237e-11	0.350648			LOC100360491	4.25769e-05	0.351897				Amph	1.19563e-05	-0.292552
	Sel1l	1.87907e-11	-0.506075			Srp9	8.95901e-05	0.351147				Dnmbp	4.53455e-07	-0.294249
	Phf20	1.95028e-11	0.381189			Nudt2	4.65659e-06	0.350815				Rgs9	1.20143e-14	-0.294377
	Glb1l2	1.98246e-11	-0.491786			Ndufb5	0.000445965	0.350604				Ankrd44	1.21042e-08	-0.294755
	Map7	2.00826e-11	0.323919			Naca	7.44724e-05	0.350346				Zscan26	3.39659e-07	-0.295293
	Tra2a	2.10898e-11	-0.486644			LOC108349606	0.000632137	0.349833				Hdac9	1.40727e-08	-0.295953
	Arpc1a	2.13151e-11	0.397436			Ndufv1	3.90516e-05	0.349756				U2surp	4.18898e-06	-0.296837
	Atp6ap2	2.27571e-11	0.339249			Cerkl	1.27591e-05	0.349592				Ccdc107	3.50016e-09	-0.299371
	Scp2	2.9092e-11	0.312275			Ndufs8	0.000779727	0.349526				Map2	8.29354e-16	-0.299992
	Fscn2	2.91401e-11	0.320344			Cotl1	2.54444e-05	0.348612				Rgs20	2.63975e-10	-0.300024
	Cerkl	3.27722e-11	0.29928			AABR07025010.1	7.73325e-07	0.348407				Rapgef5	2.75644e-09	-0.300156
	Ube2m	3.32032e-11	0.317769			LOC100912618	3.05523e-05	0.347613				AABR07007642.1	1.93074e-09	-0.300366
	Rpl19	3.35232e-11	0.278867			Ndufa12	3.2869e-06	0.347309				Wdr33	8.06721e-10	-0.300618
	Serf2	3.39956e-11	0.338139			Trappc1	0.000625365	0.347163				Flnb	4.62248e-09	-0.300792
	Pfkfb2	3.41219e-11	-0.51002			Anp32b	2.94663e-05	0.347015				Fam89a	7.10564e-08	-0.300804
	LOC498555	3.51124e-11	0.332872			Gabarap	1.25243e-05	0.345919				Cdk13	8.84035e-09	-0.302325
	Cdan1	3.93075e-11	-0.56927			Apbb1	0.000265072	0.344568				Akap10	3.78036e-06	-0.303573
	Unc79	4.65975e-11	0.566066			Atp5mf	0.000312646	0.344114				Kras	4.4383e-08	-0.304151
	Ctsd	4.94331e-11	0.359518			Eef1b2	6.1669e-05	0.343986				Mef2c	1.34496e-10	-0.304894
	Grk5	5.49981e-11	-0.55173			Ndufa2	0.000610273	0.343705				Wdr7	5.32681e-11	-0.305506
	Macf1	5.71853e-11	-0.357736			Dpysl3	2.7874e-05	0.343521				Necab3	1.65371e-06	-0.305997
	Ndufa13	6.06947e-11	0.328344			Fkbp4	9.27595e-05	0.342463				Ghitm	3.72527e-10	-0.307528
	Pde6g	6.79784e-11	-0.479967			Cyfip2	0.000310417	0.341887				Bud31	7.706e-07	-0.308673
	Anp32a.1	6.94638e-11	0.280248			Slc25a5	1.64937e-07	0.341195				Ptpn21	1.21677e-07	-0.308727
	Btbd3	6.98556e-11	0.377147			Rabggtb	0.001834	0.340648				Sp4	1.44163e-07	-0.309165
	Slc17a7	9.47537e-11	-0.279439			Plekhb1	3.71618e-05	0.340015				Syt1	2.55989e-50	-0.30917
	Wdr47	9.73647e-11	-0.525903			Cbx3	0.000357355	0.338806				Wdr78	6.82942e-10	-0.309354
	Mettl23	9.77469e-11	-0.48128			Acadm	4.89885e-06	0.338773				Orc2	4.96548e-07	-0.309866
	Polg2	1.13098e-10	-0.54326			Ccdc124	0.00107736	0.338167				Hnrnpa2b1	9.72627e-08	-0.310296
	Camk2d	1.13153e-10	-0.302291			Tmem222	0.000307474	0.337085				Ptprk	6.15313e-06	-0.310621
	Samd11	1.18499e-10	-0.474339			Ldha	8.43378e-16	0.336716				Ell2	2.00708e-06	-0.310912
	Rps9l1	1.22798e-10	0.334992			Cdc37	0.000120162	0.336195				Slc16a1	2.38042e-08	-0.313463
	Igf1r	1.31427e-10	0.379314			Psmb5	9.14576e-05	0.335975				Cdc42bpa	4.60196e-08	-0.313534
	Uqcrfs1	1.31767e-10	0.340901			Bri3	0.000124234	0.333421				Pnn	6.10033e-07	-0.313595
	Ddah2	1.33742e-10	0.350417			Mrpl34	0.00065436	0.33314				Rptor	3.47092e-08	-0.313729
	Rpl18	1.33934e-10	0.358975			B3gat3	0.000318911	0.333091				Ralgapb	6.24847e-07	-0.315019
	Slc22a17	1.34973e-10	0.365418			Dnaja1	0.000122875	0.331786				Abhd17b	3.33587e-08	-0.315071
	Stxbp1	1.47615e-10	-0.376882			Rpl35	0.000698298	0.330952				AABR07058539.1	1.70388e-07	-0.317033
	LOC100365839	1.5128e-10	0.320176			Sdf4	0.0010581	0.33082				Kpna5	1.10191e-08	-0.317055
	Map2	1.56118e-10	-0.318406			Mrpl13	3.9931e-05	0.330461				Mt-atp6	1.60301e-12	-0.318019
	Nrm	1.63253e-10	0.373668			Bpnt1	9.79523e-05	0.32958				Mapk1	4.66776e-13	-0.319409
	Hsp90ab1	1.65177e-10	0.309103			Nabp2	0.000415172	0.32955				Frmd4b	7.43125e-29	-0.319415
	Galnt7	1.69842e-10	-0.444907			Dctn1	2.09643e-05	0.328745				Prpf4b	4.41813e-10	-0.321178
	Atp6v0b	1.70326e-10	0.288811			Mat2b	4.76278e-05	0.328715				Gls	1.03294e-12	-0.321721
	Ndufa8	1.72177e-10	0.367432			Rnf7	0.000159812	0.328335				Xylt1	5.24677e-10	-0.323081
	Mrps36	1.74398e-10	0.368467			Stub1	0.000154165	0.32818				Impg1	1.43335e-16	-0.323604
	LOC100361645	1.76239e-10	-0.494275			Amotl2	0.0005205	0.327614				Agpat3	6.04663e-28	-0.323874
	Hnrnpa1	1.80198e-10	0.287114			Uqcrfs1	0.000649538	0.326254				Dgke	6.62189e-11	-0.325589
	Cadm2	1.82203e-10	0.296552			Ece1	0.000465054	0.325909				Nr2c1	1.58538e-09	-0.32684
	Usp6nl	1.86668e-10	0.317623			Pdia6	0.00164546	0.323833				Tacc2	8.25404e-11	-0.326901
	Amph	1.86757e-10	-0.480093			Tax1bp1	5.19717e-06	0.323528				Tbc1d5	2.10765e-07	-0.328015
	Atp5f1e	1.86795e-10	0.328562			RGD1562987	4.96967e-05	0.322474				Pfkfb2	3.64197e-09	-0.329565
	Atf7	1.88257e-10	0.388872			Atp5mc1	0.00011359	0.320707				Cdan1	5.23879e-08	-0.329791
	Tmem59	1.95727e-10	0.320313			Psma4	0.000336347	0.320151				Tubb5	4.68598e-14	-0.331128
	Cxxc5	1.98852e-10	0.339174			Timm8b	9.01608e-05	0.319956				Khdc4	8.69609e-07	-0.33135
	Mrps25	2.00664e-10	0.369157			Ncam1	7.61021e-05	0.318952				AABR07044668.1	5.36639e-11	-0.332398
	Itsn2	2.08052e-10	-0.388923			Hdhd2	0.000254301	0.31881				Rims2	7.24463e-25	-0.332873
	Btbd10	2.08759e-10	-0.363352			Pja2	0.000251236	0.318779				Btbd10	1.69115e-18	-0.334673
	LOC103690015	2.09803e-10	0.320633			AABR07019341.1	0.0010106	0.317543				Plekhm3	3.97549e-09	-0.336266
	Tusc3	2.11403e-10	0.272561			AA926063	1.64267e-06	0.316108				Samd11	9.56783e-10	-0.33744
	Camk1d	2.18278e-10	-0.389335			Cox17	0.00183348	0.315997				Kcnb1	1.7694e-15	-0.339851
	Cfl1	2.20317e-10	0.316435			Hmgn2	9.30948e-11	0.314919				Sag	7.80662e-68	-0.341181
	Edf1	2.62282e-10	0.320734			Txn2	3.69018e-05	0.314797				Anp32a	1.31947e-10	-0.343948
	Mrpl54	2.71426e-10	0.354144			Cdhr1	3.51157e-05	0.314696				Fam161a	6.00635e-10	-0.344239
	AABR07035539.1	2.79172e-10	0.360768			AABR07007675.1	0.00111603	0.313915				Tia1	6.08958e-09	-0.344989
	Selenok	2.87202e-10	0.275107			Mrpl15	0.000558345	0.311736				Supt16h	6.01319e-09	-0.346016
	Rps3	3.1907e-10	0.294611			LOC108348085	0.000270388	0.311035				Ppp1r10	7.20373e-13	-0.347047
	Gtf2h5	3.38784e-10	0.276547			Agap1	0.000794304	0.310519				Pter	8.03772e-09	-0.347616
	LOC100364457	3.41813e-10	0.304214			AABR07021871.1	0.000182548	0.310515				Hspa9	3.29968e-10	-0.348187
	Vamp2	3.44395e-10	0.262283			Minos1	0.000745336	0.310269				Eno1	1.01921e-11	-0.348992
	Ap1b1	3.72848e-10	0.285374			Cox7c	0.000720234	0.309861				Tanc2	1.06044e-06	-0.349377
	Psip1	3.76726e-10	0.350675			Rpl3	1.39319e-05	0.307069				Cep290	4.19701e-15	-0.350263
	Dlg4	3.87913e-10	-0.515556			Wdr83os	0.0010338	0.306831				Ispd	6.21932e-10	-0.350622
	Ppib	3.92593e-10	0.335482			Cox5a	0.000537393	0.30561				Clcn3	3.58543e-10	-0.353545
	Plekhb1	4.59374e-10	0.316995			Zfp428	0.000218111	0.304354				Leng8	2.44708e-11	-0.354698
	Eif4h	4.7582e-10	0.315064			Eif4g2	0.000611168	0.30374				Wdr17	3.74947e-26	-0.355885
	Gnb5	5.20394e-10	-0.484936			Wdr6	0.000441218	0.303488				Cdkl5	1.43378e-10	-0.355912
	Wdr78	5.25582e-10	-0.491363			AABR07044408.1	1.29368e-05	0.302012				Zfp207	1.68589e-09	-0.35643
	Sncb	5.25942e-10	0.318537			Gadd45gip1	0.00255263	0.300926				Tmx1	6.86375e-10	-0.36258
	Chrac1	5.51081e-10	0.372217			Isca1	0.000373738	0.300267				Itsn2	8.0728e-16	-0.362633
	Cnnm4	5.60508e-10	0.373373			Rps13	0.00280145	0.298675				Cited2	8.21285e-16	-0.363876
	Rps13	5.73919e-10	0.334681			Cdk2ap2	0.00162239	0.296964				Dlg4	1.63694e-11	-0.364643
	Pcmtd2	8.03064e-10	-0.259164			Phb2	0.00164784	0.296893				Mdm1	4.86443e-13	-0.365082
	Zscan26	8.1709e-10	-0.520097			Skp1	0.00419416	0.296401				Hif1a	6.74086e-15	-0.366081
	Tmem9	8.24583e-10	0.3064			RGD1359290	0.00190121	0.295817				Dtymk	7.66253e-11	-0.366519
	Ypel3	8.6633e-10	0.282707			Ptp4a3	0.000339768	0.295252				Son	4.29438e-15	-0.367594
	AABR07029581.1	8.74628e-10	-0.510259			Phb	0.000836472	0.295233				Clk1	4.74141e-10	-0.368223
	Ptdss2	9.64909e-10	0.291598			Epas1	0.000622085	0.294544				Nme3	3.57051e-12	-0.369049
	Nxnl2	9.72123e-10	0.251656			Ptov1	0.00119186	0.294367				Psme4	3.18023e-11	-0.369627
	Gtf3c2	1.02465e-09	-0.502761			Dynlrb1	0.00650975	0.293774				Mpdz	1.59344e-11	-0.370699
	Mapk1	1.04369e-09	-0.380553			AABR07031666.1	0.00839718	0.29177				Guca1a	2.47548e-68	-0.371012
	Ppa1	1.10768e-09	0.28018			Tmem42	0.00397172	0.291705				N4bp2l2	1.3354e-10	-0.376887
	Ube2e3	1.15117e-09	0.295694			Vdac1	0.000365247	0.291214				Faf1	1.81488e-09	-0.377087
	Lamtor4	1.17095e-09	0.303358			Trir	0.00543409	0.291164				Ckmt1	3.02805e-11	-0.378881
	Rpl14	1.17742e-09	0.289035			Shroom3	0.000165085	0.290866				Plaa	2.15766e-11	-0.379602
	Nptn	1.3158e-09	-0.391655			AABR07052613.1	0.00239603	0.29047				Hmmr	2.97262e-12	-0.379607
	Atp5po	1.34802e-09	0.284412			Arfip2	0.000201675	0.290428				Cds1	5.16211e-23	-0.380329
	Zfc3h1	1.43563e-09	-0.44109			Gtf2a1	0.00716739	0.290159				Nfyb	8.78086e-12	-0.380796
	Anp32b	1.4471e-09	0.320674			Asah1	0.00779812	0.289243				Nfatc3	3.70216e-11	-0.381107
	Dguok	1.46923e-09	-0.488209			Dennd5a	0.00015265	0.289055				Stk35	2.97978e-13	-0.385514
	RGD1565989	1.4888e-09	0.356557			Eif3f	0.00411929	0.288252				Kcne2	2.27513e-10	-0.386309
	Csnk1a1	1.50595e-09	0.318178			Pfdn2	0.000247527	0.28784				Fam53b	1.67073e-13	-0.38664
	Dlg5	1.60767e-09	0.293565			Usp6nl	0.00128779	0.287472				Srsf5	8.96003e-13	-0.390267
	Ebpl	1.76895e-09	0.329548			Rab4b	0.000435949	0.287273				Camsap1	1.66546e-13	-0.39218
	Slc24a1	1.77502e-09	-0.350565			Rps29	0.000694555	0.287064				Pla2r1	4.5566e-22	-0.392749
	Bcap31	1.84064e-09	0.329871			Dpcd	0.00136228	0.286146				Fundc2	2.35641e-14	-0.396696
	Fkbp3	1.88747e-09	0.367014			Clcn4	0.00124788	0.285881				Ccdc51	4.52595e-15	-0.397832
	Clstn1	1.91406e-09	0.314958			Sumo1	0.00117028	0.285481				Atxn1	3.25272e-19	-0.405479
	AABR07040864.1	1.98859e-09	0.863288			Dad1	0.000896587	0.284456				Lama4	5.34134e-09	-0.405587
	Cdkl5	1.99516e-09	-0.497287			Ccng1	0.000688868	0.284028				Zfc3h1	4.99852e-17	-0.407184
	Dpysl3	2.09517e-09	0.265871			Tm2d2	0.00199486	0.283739				Fam169a	1.3524e-12	-0.411085
	Hist3h2ba	2.47811e-09	0.362525			Anapc11	0.000943986	0.28342				LOC100912181	1.4598e-15	-0.41489
	Sec14l2	2.72848e-09	0.348602			Negr1	3.50238e-07	0.283248				Arfgef1	4.54581e-15	-0.415012
	Ldhb	2.74132e-09	0.341949			Smim10l1	0.00237739	0.282331				Rabgef1	4.02604e-16	-0.415085
	Tbl1x	2.98945e-09	0.327906			Ndufb3	0.000725187	0.282057				Zc3h11a	3.19164e-18	-0.415206
	Myo9a	2.99931e-09	0.347431			Rasal2	0.000670898	0.281351				Tsks	2.57184e-23	-0.419091
	Rpl4	3.24741e-09	0.352482			Snrpe	0.00240875	0.281268				Iars	9.19436e-13	-0.420239
	Sem1	3.26494e-09	0.326759			Atp6v0d1	0.000540536	0.28008				Tbc1d32	4.99115e-13	-0.421826
	Map2k2	3.31302e-09	0.28227			Ndufc2	0.000348155	0.279431				Cnst	4.83796e-14	-0.423744
	Lnpk	3.58393e-09	-0.461623			Ctnnbip1	0.00326722	0.279023				Cers4	4.27467e-21	-0.425141
	Cuedc1	3.83366e-09	0.33297			Nedd4	5.55444e-05	0.277761				Rmc1	8.70192e-12	-0.425902
	Cerk	3.86231e-09	0.308349			Pfdn5	0.00159243	0.27698				AABR07034767.1	3.38393e-17	-0.426833
	Atp5mc3	3.96791e-09	0.325316			Srp14	0.000305179	0.276912				Macf1	1.31072e-17	-0.428559
	Sla2	4.09881e-09	0.310815			Rab5c	0.001946	0.275315				Slc3a2	1.20713e-16	-0.429267
	Tdrd7	4.13299e-09	-0.43839			Slc3a2	0.00600991	0.274956				Eprs	4.63965e-15	-0.432098
	Cep112	4.141e-09	0.353159			Ube2e3	0.00356652	0.274849				Slc31a2	1.68082e-20	-0.432973
	Arl15	4.16366e-09	-0.475158			Elob	0.00289013	0.274299				Igsf9	1.24697e-17	-0.433347
	Hsbp1l1	4.18248e-09	-0.547521			Pitpnm1	0.00597836	0.273434				Uckl1	2.70069e-18	-0.437938
	Tmem205	5.04844e-09	0.327611			Ift43	0.00377881	0.273371				Grk1	3.42248e-24	-0.4393
	Rpl36al	5.41516e-09	0.325932			Slc7a5	0.00266513	0.271138				Shank2	1.8393e-16	-0.442936
	Cdk5rap3	5.70769e-09	0.283614			Smpd1	0.00336636	0.270659				Prdm1	2.45227e-14	-0.443499
	Set	6.37434e-09	0.306779			Vps39	0.0020966	0.270455				Csgalnact2	4.68543e-14	-0.446526
	Polr3h	6.60292e-09	0.332763			Cct2	0.000338349	0.27003				Gars	2.42784e-15	-0.446695
	Cacna2d1	6.87238e-09	0.35357			Rpl18a	0.00218474	0.269158				Add1	3.82824e-26	-0.44763
	Yeats4	6.87892e-09	0.305507			Psma2	0.00277806	0.268827				Plekhf2	2.77847e-19	-0.45197
	Rpl28	6.87973e-09	0.32003			Cacybp	0.0124266	0.266966				Crb1	1.50725e-22	-0.452511
	Csgalnact2	7.37409e-09	-0.508351			Ppib	0.00181456	0.266188				Diaph3	4.53405e-19	-0.453984
	Naca	8.32152e-09	0.273248			Pqbp1	0.001542	0.26556				Acyp2	1.55469e-12	-0.454993
	Gucy2d	9.66343e-09	-0.483784			Mrpl18	0.0221439	0.264948				Wdr47	1.47189e-18	-0.461005
	Dach1	9.73125e-09	0.370319			Pin1	0.00419978	0.264508				Alpl	2.18278e-17	-0.463005
	Itgb1bp1	1.01083e-08	0.349404			Ubl3	0.00115537	0.264055				Apoa2	1.01848e-17	-0.465096
	Dctn1	1.02544e-08	0.293447			Arhgap12	0.000179063	0.26366				Madd	3.03213e-18	-0.466674
	Ppargc1a	1.0614e-08	-0.475916			Rpn2	0.00750406	0.263396				Ttc39c	2.07338e-24	-0.468478
	Atp1b2	1.29936e-08	0.255637			Chd4	0.00704057	0.261699				Sgk1	1.97311e-17	-0.47
	Nr2c1	1.32866e-08	-0.468642			Rpl10	0.00560994	0.261161				AABR07058441.1	5.03162e-19	-0.472796
	Samd7	1.3494e-08	-0.52908			LOC108348172	0.0189603	0.259418				Cdc23	4.09338e-20	-0.473269
	Ppef2	1.3703e-08	-0.307815			Atg101	0.00232537	0.259203				Xiap	1.41506e-17	-0.475128
	Mat2a	1.38131e-08	0.338381			Cep112	0.000343055	0.258178				Setbp1	4.35253e-15	-0.477917
	Zmynd10	1.46396e-08	-0.455765			Tbl1xr1	0.00251552	0.257836				Hcn1	2.12191e-64	-0.478095
	Mtch1	1.51561e-08	0.289079			Tcp1	0.00229253	0.256813				Zdhhc6	2.71826e-20	-0.480003
	Zfp566	1.59975e-08	-0.456262			Gabarapl1	0.00811477	0.256509				Mpp4	4.683e-27	-0.483628
	Trim44	1.68768e-08	-0.475676			Hikeshi	0.00457769	0.256118				Gucy2f	8.6234e-27	-0.485044
	Btd	1.71174e-08	-0.463863			Dync1h1	0.00128179	0.255847				St3gal1	1.62808e-21	-0.491997
	Glo1	1.76003e-08	0.286161			Adpgk	0.00134253	0.255831				Herpud1	6.32466e-17	-0.492934
	Ppp1r10	1.76163e-08	-0.463835			Rpl27a	0.0127003	0.255689				Srsf6	7.19075e-26	-0.493183
	Slc26a2	1.84916e-08	0.351309			Psma7	0.000359191	0.255555				Sel1l	1.28386e-19	-0.495004
	Bin1	1.86995e-08	0.293853			Anp32a.1	0.00178337	0.255157				Pak7	8.0765e-16	-0.496067
	Adamtsl4	2.01313e-08	0.300149			RGD1304622	0.00345312	0.253997				Arl15	3.53558e-17	-0.498194
	Rpl27a	2.04424e-08	0.258966			Ppp2r3a	0.000906876	0.253784				Gnb1	3.29767e-137	-0.498353
	Cstb	2.05098e-08	0.316943			Trappc6b	0.011199	0.253227				Tmem116	9.05561e-26	-0.501066
	Grb10	2.08729e-08	-0.485751			Jtb	0.0121374	0.252736				Msr1	3.25572e-20	-0.501424
	Rnf7	2.11209e-08	0.272438			Sesn1	0.00905265	0.252375				AABR07000398.1	8.40293e-41	-0.505528
	Ctsl	2.26429e-08	0.281792			Mkks	0.00504486	0.251422				RGD1563888	4.84558e-23	-0.508718
	Zbtb8a	2.30104e-08	-0.427629			Cuedc1	0.00226798	0.251347				Sntb2	2.21755e-32	-0.51408
	Slc38a3	2.46678e-08	-0.312165			Fdps	0.00725905	0.251189				Fhod3	5.29259e-29	-0.514649
	Cox5a	2.50104e-08	0.318652			Csnk2b	0.00910502	0.250987				Stard7	5.53848e-38	-0.518597
	RGD1304622	2.55584e-08	0.320786			Hagh	0.040327	0.250837				Dync1i2	8.01621e-24	-0.519717
	Vps39	2.58668e-08	0.303417			Rnh1	0.0172265	0.250494				Rtbdn	1.76678e-88	-0.519763
	AABR07031089.1	2.65539e-08	0.274559			Gphn	0.000502599	-0.25014				Pbrm1	7.3669e-24	-0.520249
	Sgip1	2.71302e-08	-0.29554			Tmem170b	0.000343412	-0.250159				Mt-nd4	3.43853e-36	-0.522188
	Esd	2.7664e-08	0.315007			Atf6	0.000510715	-0.251004				Sgip1	3.41019e-45	-0.526058
	Mrpl13	2.99257e-08	0.309726			Zfp451	0.00115124	-0.25184				Cacnb2	4.56809e-71	-0.528027
	Tmbim4	3.112e-08	0.318275			Eps8	0.00162685	-0.251902				Hk2	4.47238e-31	-0.529099
	Rab3ip	3.13721e-08	0.276728			Far1	6.04507e-05	-0.252093				Chd2	2.54042e-20	-0.535544
	Acsl6	3.22131e-08	-0.336246			Amph	0.000134984	-0.252343				Rp1	2.81974e-89	-0.5409
	Sertad1	3.32305e-08	0.304747			Wdr70	0.00267914	-0.252457				Kdm4c	1.34113e-73	-0.543118
	Tbc1d5	3.57945e-08	-0.395127			Rhot1	0.000494658	-0.252532				Gnat1	5.03593e-66	-0.551436
	Mbnl1	3.58693e-08	-0.350896			Dusp14	0.000222736	-0.252921				Fam171b	1.79611e-27	-0.555541
	Snrpe	4.03367e-08	0.299324			Arid3b	0.0020538	-0.25305				RGD1597339	1.46636e-56	-0.555976
	Mien1	5.12055e-08	0.309453			Mef2a	0.000522846	-0.253269				Rbm41	1.15296e-21	-0.557523
	Ost4	5.18459e-08	0.320232			Mapk8	0.00432663	-0.253465				Hook1	1.05715e-30	-0.559998
	Mab21l1	5.4195e-08	0.336383			Smarcc1	0.00159526	-0.2535				Pde6b	3.44403e-96	-0.563146
	Dctn2	5.81357e-08	0.279261			Ddhd1	0.00210501	-0.253605				Ric8b	4.84318e-26	-0.565552
	Adgrv1	5.8375e-08	0.256161			Atf2	0.000867285	-0.253881				Smarcd1	1.41803e-27	-0.581752
	Swi5	5.87265e-08	0.275965			Chd2	0.000275733	-0.253894				Kdm5c	1.1728e-23	-0.581907
	Ralgps1	6.80541e-08	0.334714			Ncor1	7.03559e-05	-0.254415				Raly	4.73452e-76	-0.592865
	Srsf5	7.02093e-08	-0.41986			Brcc3	0.000116547	-0.254573				Mast2	1.80454e-38	-0.594916
	Tspan7	7.19366e-08	0.281619			Ppp3cc	0.000946227	-0.255137				Mgat4d	1.42783e-29	-0.596901
	Npm1	7.77238e-08	0.325222			Rpl17	4.37623e-05	-0.255432				Cabp4	7.00527e-91	-0.606464
	Fam149a	7.80409e-08	-0.46038			Ogt	4.17105e-05	-0.255629				Lars	9.77866e-31	-0.606868
	Ahcyl1	8.24867e-08	-0.492415			Med13	0.00102762	-0.255696				Mars	1.04698e-29	-0.606876
	AABR07072400.1	8.66936e-08	0.293964			Dcaf5	0.00335302	-0.255702				AABR07068851.1	3.80987e-46	-0.608781
	Thsd7a	8.75409e-08	0.278154			Tbc1d32	0.000620414	-0.256603				Rs1	9.70083e-38	-0.616024
	Micu2	8.98495e-08	0.25376			Zfp449	0.000242246	-0.256778				Trove2	3.21683e-34	-0.621388
	Kpna5	9.76497e-08	-0.4679			Ckap5	0.00046122	-0.25707				Shroom4	1.62841e-30	-0.637288
	Mpdz	1.07004e-07	-0.388925			Rbm26	3.17938e-05	-0.257218				Herc3	2.49366e-52	-0.650451
	Rdh8	1.10269e-07	-0.481823			Sumo3	0.0001034	-0.257674				Unc13b	1.26243e-42	-0.65945
	Gulp1	1.19952e-07	-0.366328			Mxi1	0.000193369	-0.2578				Drd4	1.38018e-41	-0.665452
	Napb	1.21194e-07	0.297525			Ppig	0.000410135	-0.257897				Rrp1b	3.27327e-36	-0.669316
	Ppp2r5e	1.24903e-07	-0.379799			Cds1	1.86228e-08	-0.257991				Prkca	7.48784e-59	-0.678523
	AABR07031666.1	1.40154e-07	0.286175			Sh3glb1	1.84966e-05	-0.258074				AABR07026641.1	2.56245e-31	-0.708694
	LOC100361025	1.40882e-07	0.25744			Snrk	0.00171704	-0.258394				Slc4a7	2.75335e-52	-0.729528
	Nudt2	1.52774e-07	0.261375			Ccny	0.000136041	-0.258402				Rdh11	2.61421e-56	-0.732795
	Zfp143	1.56287e-07	-0.465916			Klhdc10	0.000652508	-0.258453				Glmn	8.40511e-40	-0.735687
	Pnn	1.58077e-07	-0.445845			Sema3f	0.000137261	-0.258795				Pde6g	3.1243e-41	-0.749985
	Cep104	1.65295e-07	0.325287			Ankrd17	0.000235742	-0.258799				Arl4d	3.11559e-55	-0.769671
	LOC679894	1.7818e-07	-0.424779			Pias2	0.000154875	-0.259057				Oxr1	9.15829e-84	-0.784896
	Rab4b	2.0253e-07	0.268409			Myef2	0.0017767	-0.259277				Dmd	7.289e-194	-0.788934
	Tusc2	2.04649e-07	0.254296			Mark3	0.000268583	-0.259441				Asns	3.56935e-48	-0.798325
	Zfp36l2	2.07812e-07	0.315636			Relch	0.00883984	-0.260631				RT1-CE10	2.82451e-49	-0.827602
	Arfgef1	2.11858e-07	-0.392982			Mindy2	0.000124487	-0.260652				AABR07040864.1	7.72918e-15	-0.860863
	Spata5	2.20346e-07	-0.451056			Srsf11	0.000234692	-0.260814				Slc6a6	2.67349e-100	-0.868936
	Ckmt1	2.21913e-07	-0.467076			Rnpc3	0.00294458	-0.261437				AABR07044408.1	2.78594e-77	-0.893023
	Rd3	2.28449e-07	-0.457535			Nsd3	1.1142e-05	-0.261443				RGD1560925	1.69002e-260	-0.905492
	Minos1	2.49801e-07	0.282221			Erp44	0.00132908	-0.262063				Stkld1	7.10354e-80	-0.924801
	Kank1	2.50748e-07	0.293195			Slc30a9	0.000776341	-0.262576				Pax4	3.11502e-92	-0.976868
	Nfyb	2.7573e-07	-0.484055			Taok1	0.00283668	-0.262789
	Plekhf2	2.83644e-07	-0.480705			Plekhg1	3.22749e-05	-0.263121
	Hdhd2	3.20477e-07	0.260643			Iqsec1	7.46518e-05	-0.263301
	Acaca	3.31651e-07	-0.456061			Dnajc5	4.60232e-05	-0.264466
	Prim1	3.34487e-07	0.261687			Fam53a	0.00015878	-0.26459
	AC134224.1	3.35265e-07	-0.290843			Luc7l3	2.86888e-05	-0.264611
	Serbp1	3.47376e-07	0.259347			Zfp692	0.00053875	-0.265005
	Rhbdl3	3.62285e-07	0.25802			Kdm4a	0.000591137	-0.265078
	Atp6v1f	3.68726e-07	0.275369			LOC100909712	2.19712e-05	-0.26575
	Mettl7a	3.83491e-07	0.28603			Ubxn11	0.000117182	-0.266338
	Plaa	3.83664e-07	-0.426541			Raf1	0.000285051	-0.266847
	Phf5a	3.87864e-07	0.258614			Fam193b	0.00048523	-0.267082
	Slc12a6	3.94012e-07	0.291393			Map3k3	0.00250307	-0.267236
	Ppp2r5c	4.01136e-07	-0.349226			Nrxn3	0.00100875	-0.267502
	Adamts3	4.37098e-07	-0.416003			Mpp7	0.00103058	-0.267552
	Krcc1	5.34994e-07	0.277381			Tubb5	5.88329e-08	-0.268122
	Phlpp2	5.38923e-07	-0.397756			Elavl1	8.73659e-05	-0.268237
	Arhgef26	5.66929e-07	-0.420045			Arfgap1	9.57974e-05	-0.268606
	Tecr	5.84596e-07	0.252518			Acsl1	8.31098e-05	-0.268822
	Pdzd8	5.87567e-07	0.337135			Zfp629	6.81382e-06	-0.268852
	Msi1	5.92259e-07	-0.361108			Hsdl2	0.00106237	-0.269036
	Cnst	6.22114e-07	-0.428541			Ddx50	0.00160417	-0.269105
	Cd81	6.71245e-07	0.258292			Zdhhc2	0.000158853	-0.269429
	Epc1	6.78769e-07	-0.403933			Gcc2	0.000153663	-0.269691
	LOC100912618	6.86612e-07	0.280414			Ublcp1	9.38074e-05	-0.270184
	Sdhaf1	7.10046e-07	-0.416453			Abcg1	1.30567e-05	-0.270319
	Alpl	7.5086e-07	-0.425778			Ankib1	0.000435484	-0.270553
	Ppm1h	7.61185e-07	0.276396			Dmtf1	0.000138322	-0.270626
	Hspa9	7.85013e-07	-0.409966			Brwd1	7.34347e-05	-0.270945
	Arl4d	8.40406e-07	-0.347949			Stag2	1.06728e-05	-0.271773
	Capza2	8.44937e-07	0.279562			Larp1	0.000569704	-0.272332
	Rps11	8.69646e-07	0.268398			Mpped2	2.49168e-06	-0.272528
	Ndfip2	8.82996e-07	0.273788			Ppargc1a	0.00228664	-0.2737
	Kif21a	8.83509e-07	0.263299			Gbf1	1.21272e-05	-0.273993
	Ccs	9.74912e-07	0.250061			Cyth2	1.2888e-06	-0.274087
	Ngdn	9.88764e-07	0.286242			Ecpas	0.000915549	-0.274375
	Msi2	1.04816e-06	-0.317165			Pspc1	3.22071e-05	-0.27462
	Adcy1	1.05964e-06	0.28149			Tia1	0.000108448	-0.274839
	Tet3	1.09051e-06	-0.387276			Thrap3	5.19845e-05	-0.274898
	Cacybp	1.09569e-06	0.260052			Vcl	0.000781353	-0.275474
	Actr10	1.27165e-06	0.250961			Srsf1	0.000119676	-0.275535
	RT1-T24-1	1.35922e-06	0.307488			Lman2l	0.00161132	-0.276628
	Meis2	1.40026e-06	0.250108			Rnf149	2.08702e-05	-0.277278
	Xiap	1.41405e-06	-0.461371			Necap1	2.78923e-05	-0.277361
	Gdpd5	1.43527e-06	0.253488			Psmc2	7.77866e-05	-0.277438
	Kif2c	1.49805e-06	-0.435154			Agpat3	6.21244e-14	-0.277592
	Oxct1	1.52412e-06	0.251141			Drd4	8.69063e-06	-0.277955
	Clcn4	1.56798e-06	0.260128			Dyrk1a	0.000129172	-0.278071
	Nsmce4a	1.59031e-06	0.276938			Wdr78	0.000497243	-0.278513
	Nfs1	1.73487e-06	0.254526			Xpo1	2.42772e-05	-0.278611
	Nxnl1	1.92724e-06	-0.42434			Golga1	4.74205e-05	-0.2787
	Hmg20b	1.98709e-06	0.260932			Abcc1	3.49595e-05	-0.278754
	Ankhd1	2.19347e-06	-0.367485			Grk4	0.000476616	-0.278798
	Retreg2	2.31136e-06	0.255196			Rbm5	4.55308e-06	-0.278892
	Srsf1	2.45271e-06	-0.366741			Oxsr1	9.03244e-05	-0.278991
	Add3	2.56271e-06	-0.418213			Smc1a	4.29558e-05	-0.279726
	Ppp1r9a	2.85165e-06	-0.412054			Ush2a	9.47619e-15	-0.279936
	Dync1i2	3.02962e-06	-0.364294			Mcm9	0.000276992	-0.280072
	Rabgap1l	3.17018e-06	0.306095			Prpf40a	8.02888e-05	-0.280801
	Cmtr1	3.5462e-06	0.27488			AABR07007642.1	1.23622e-05	-0.280917
	Flcn	3.59552e-06	-0.425846			Map4k5	0.000222461	-0.281264
	Exoc4	3.77361e-06	-0.353955			Nr2c1	0.000254713	-0.281421
	Anapc5	4.15149e-06	-0.406288			Nbas	0.00469712	-0.281438
	Abcg1	4.18297e-06	-0.383133			Ate1	2.09312e-05	-0.281707
	Sgk1	4.6336e-06	-0.42605			Mak	5.63291e-05	-0.282182
	Zfp292	4.82945e-06	-0.373339			Ambra1	0.00138171	-0.282545
	Carmil1	4.83548e-06	-0.414706			Ercc6l2	0.000707355	-0.283376
	AC106605.1	4.96381e-06	-0.366572			Slc25a16	0.0004789	-0.284825
	Akap13	5.34507e-06	0.259612			Tbc1d5	0.000132008	-0.284935
	Trafd1	5.87722e-06	-0.425882			AABR07021704.1	7.89877e-05	-0.285182
	Fyco1	6.08576e-06	-0.37374			Apoa2	0.000311906	-0.285257
	Lrrc49	6.13674e-06	-0.384328			R3hdm1	0.000804867	-0.285371
	Wdr59	6.27681e-06	-0.371389			Svil	2.39833e-05	-0.285897
	Elf2	6.50979e-06	0.263569			Fus	2.89032e-05	-0.286452
	Arhgap26	6.77476e-06	-0.367947			Tcf12	8.97315e-07	-0.287585
	Herpud1	7.28189e-06	-0.396827			Bbs4	4.54922e-06	-0.287826
	Ankrd44	7.45727e-06	-0.332664			Prdm2	0.000705178	-0.287932
	Slc7a8	7.46387e-06	-0.370947			Mrps28	0.000152956	-0.288138
	Klhl12	8.06654e-06	-0.401586			Cpsf6	6.62947e-05	-0.289267
	Atf2	8.74451e-06	-0.411487			Nfatc3	0.00023855	-0.289289
	Ntm	9.13023e-06	-0.330947			Zcchc8	0.000155541	-0.289774
	Commd4	9.64958e-06	-0.381984			Faf1	5.46367e-06	-0.290564
	Cdkn1b	1.06455e-05	0.270056			Igsf9	7.90114e-06	-0.290664
	G6pd	1.08368e-05	-0.350293			Hif1a	4.78912e-06	-0.290902
	Zmat4	1.10496e-05	0.321721			Rbx1	0.000189335	-0.291324
	AABR07024637.1	1.26174e-05	-0.381123			Xrn1	0.00101177	-0.291692
	Eml6	1.28923e-05	0.257703			Prdm1	1.94274e-05	-0.292731
	Ptpn21	1.2903e-05	-0.356152			Hsbp1l1	4.64108e-05	-0.292819
	Ogt	1.32111e-05	-0.382816			Snapin	5.29093e-05	-0.29308
	Cyfip2	1.32845e-05	0.262272			Iffo1	8.53815e-06	-0.293345
	Pomt2	1.5524e-05	-0.378052			Dhdds	1.87501e-05	-0.293426
	LOC100912181	1.63532e-05	-0.436803			Mapk1	2.37684e-06	-0.293562
	Ttc39c	1.65082e-05	-0.290004			Mavs	1.78276e-05	-0.293943
	Trmt13	1.73867e-05	-0.393097			Tnrc6c	0.000206142	-0.294019
	Plekhg1	1.78979e-05	-0.368361			Zfp143	0.000134978	-0.294139
	Phyhd1	1.85134e-05	-0.379958			Gnat1	3.4291e-16	-0.294343
	Tcerg1	2.11441e-05	-0.387913			Slc44a1	5.92647e-05	-0.294463
	St3gal1	2.12246e-05	-0.433607			Ythdc1	0.000119848	-0.294466
	Pdss2	2.18549e-05	-0.35397			Cdk12	1.48644e-05	-0.294723
	Utp3	2.27962e-05	-0.349425			Aifm1	0.000314397	-0.295077
	Adipor1	2.38283e-05	-0.280586			Cntnap5c	3.26883e-05	-0.295288
	Anks1a	2.44296e-05	-0.395343			AABR07024637.1	6.55419e-05	-0.295359
	Stk39	2.45434e-05	-0.344074			Arid2	5.41064e-05	-0.295687
	Iws1	2.58407e-05	-0.372411			Wbp4	1.84609e-05	-0.295751
	Akap6	2.58587e-05	-0.343619			Tob2	1.24044e-05	-0.295801
	Ppara	2.98371e-05	-0.345062			Cnot9	0.000314085	-0.297007
	Enah	3.20853e-05	-0.365964			LOC361646	5.07463e-06	-0.297027
	Zc3h11a	3.20856e-05	-0.354977			Cox15	2.64346e-05	-0.29748
	Asph	3.78251e-05	-0.391499			Sp3	0.00023267	-0.298198
	Nono	3.95583e-05	-0.277146			Atrx.1	0.000132211	-0.298262
	Osbpl9	4.04002e-05	-0.368923			Ppp3cb	0.00134198	-0.298357
	Birc6	4.69598e-05	-0.325445			Adipor1	1.83325e-08	-0.299147
	Cbfb	0.000114801	0.255124			Rictor	0.000704939	-0.300121
	Sfpq	0.0361804	-0.250002			Slc24a1	1.21306e-12	-0.300281
	Pias2	0.0245615	-0.250009			Rptor	5.84988e-06	-0.300943
	Atp6v1b2	0.0127021	-0.250549			Mef2c	4.85625e-08	-0.301439
	Herc1	0.0108146	-0.250787			Wnk1	4.77176e-06	-0.301772
	Naa20	0.0206631	-0.251239			Rps6kc1	0.000380131	-0.301828
	Mtcl1	0.0184175	-0.251779			Disp1	4.80521e-05	-0.302276
	Uchl5	0.004573	-0.252382			Fsd1l	0.000231629	-0.302291
	Dcaf10	0.0467643	-0.25286			Pbrm1	8.86964e-06	-0.302463
	Brd1	0.0542833	-0.253064			Nptn	2.90495e-07	-0.302622
	Tob2	0.0528191	-0.253325			Arntl	4.51383e-05	-0.302625
	AABR07066522.1	0.0087171	-0.253497			Dmxl1	2.94459e-06	-0.303307
	Stim1	0.0608649	-0.253874			Smurf2	3.25727e-05	-0.303825
	Ubr3	0.000604974	-0.253902			RGD1310951	2.6945e-05	-0.303939
	Smurf2	0.0297899	-0.254404			Stxbp1	1.31483e-09	-0.304114
	Ccdc6	0.0229404	-0.25542			Akap8l	6.55668e-06	-0.304427
	Babam2	0.0196657	-0.255595			Fubp1	7.06328e-06	-0.304691
	Sephs1	0.0821752	-0.255651			Mdm1	1.01738e-05	-0.305354
	Jag1	0.0103639	-0.255755			Arih1	1.15436e-06	-0.305627
	Tbcd	0.00368439	-0.255998			Pip5k1a	0.00996269	-0.305724
	Ddhd1	0.0268091	-0.256469			Armc1	8.62193e-06	-0.305773
	Dusp14	0.042879	-0.256829			Capn13	5.46696e-06	-0.305821
	Kansl1	0.0162712	-0.256887			Pip4k2c	1.99805e-05	-0.306222
	Camsap1	0.013804	-0.25745			Ints8	5.74614e-05	-0.306326
	Itfg2	0.0496476	-0.257956			Safb	1.169e-05	-0.306424
	Fnip2	0.0123088	-0.258048			Flnb	5.57377e-05	-0.306789
	Adprhl2	0.00524265	-0.258143			Top1	0.000275778	-0.307679
	Pclo	7.38094e-05	-0.258378			Fam135a	1.78669e-05	-0.30792
	Kdm5a	0.0520391	-0.259244			Gls	9.32447e-08	-0.308193
	Disp1	0.0194483	-0.260129			Wasl	8.44997e-05	-0.308659
	Gbf1	0.00139219	-0.261236			Pomt2	5.23048e-05	-0.308779
	Ift74	0.00696229	-0.261565			Dis3l2	5.04432e-05	-0.308905
	Fam169a	0.0206834	-0.261773			Tra2b	6.25088e-06	-0.309122
	Scaf8	0.0749468	-0.263192			Crym	4.30501e-06	-0.309139
	Pten	0.0117642	-0.26355			Akap10	1.12904e-05	-0.309193
	Klhl18	0.000128813	-0.26439			Trip12	0.0001353	-0.309319
	Fhod3	0.000299479	-0.264856			Dcaf10	0.000423786	-0.309798
	Ankrd12	0.000889166	-0.265076			Fryl	3.32843e-05	-0.310345
	Msr1	0.0315716	-0.265094			AC134224.3	4.33884e-50	-0.310535
	Pan3	0.00560821	-0.265404			Impg1	8.5346e-07	-0.310729
	Ddx17	0.00198622	-0.265869			Wac	0.000120163	-0.310813
	Fundc2	0.0134341	-0.266288			Arhgef12	0.000149667	-0.311361
	Eps15l1	0.00330983	-0.266378			Pacs1	0.000415508	-0.311545
	Vcl	0.00882806	-0.269243			Cacna2d4	1.39559e-06	-0.312345
	Yars	0.00542993	-0.269307			Ak2	8.47815e-06	-0.313325
	Ppp1r12b	0.0309774	-0.269316			Swt1	0.00119603	-0.313639
	Cfap69	0.00624069	-0.269388			Ehbp1	0.000468089	-0.314253
	Ift20	0.0131749	-0.269834			Ccdc62	8.6006e-05	-0.314362
	Ak2	0.015164	-0.269839			Cdc42bpa	9.10891e-06	-0.315335
	Cwc27	0.00339527	-0.269862			AABR07026125.1	0.000139178	-0.315475
	Safb	0.0243285	-0.269925			Mmd2	2.90024e-05	-0.316609
	Ankrd17	0.00465615	-0.270563			Xkr6	2.8293e-05	-0.316975
	Slc1a7	0.00026182	-0.270972			Fto	2.02486e-05	-0.317004
	Cspp1	0.0239034	-0.271836			Btd	3.33841e-05	-0.317458
	Srek1	0.00462526	-0.272553			Tom1l2	4.34577e-05	-0.317684
	Tbc1d32	0.0106873	-0.272761			Pank2	9.49567e-06	-0.317685
	Ate1	0.00732682	-0.272847			Ric1	2.99855e-05	-0.31869
	Rhot2	0.00791041	-0.274109			Madd	4.57143e-06	-0.319144
	Ypel2	0.0143596	-0.274213			Gatad2b	6.47433e-06	-0.319159
	Prdm1	0.00748435	-0.274525			Baz1b	9.12945e-06	-0.319244
	Nars	0.00517933	-0.27479			Nol11	4.20487e-06	-0.319737
	Fam193b	0.0165656	-0.274828			Dhx36	1.094e-06	-0.319739
	Wdr60	0.00750376	-0.274981			Nop56	0.000411173	-0.320011
	Ccdc186	0.0142451	-0.27574			Srcap	3.23459e-06	-0.320255
	Herc2	0.0384537	-0.275948			Plekhm3	1.5527e-05	-0.320433
	Eps8	0.0028674	-0.276335			AC105531.1	3.87343e-05	-0.320609
	Phc2	0.111771	-0.276858			Mfsd8	8.87854e-05	-0.320944
	Golga1	0.0148476	-0.278608			Immt	3.99403e-06	-0.321572
	Snapin	0.013849	-0.278885			Hook1	4.96022e-07	-0.32163
	Tspan5	0.000158132	-0.279412			Stag1	1.84575e-07	-0.322921
	Armc1	0.0125162	-0.279818			Bzw2	1.11413e-07	-0.32296
	Pitpnm2	0.0656617	-0.280419			Ube2h	1.38375e-07	-0.323008
	Cbfa2t2	0.0149804	-0.281311			Supt6h	2.28428e-05	-0.323013
	Pip4k2c	0.00717988	-0.281413			Kdm3b	1.98663e-05	-0.323098
	Ppp3cc	0.0101971	-0.281442			Tmem237	3.10239e-08	-0.323401
	Icmt	0.00817345	-0.282384			Zbtb8a	1.34604e-05	-0.323775
	Desi1	0.0031065	-0.282872			Cdc14a	8.06745e-05	-0.324159
	Arel1	0.00216912	-0.284965			Ubn2	8.07459e-05	-0.325215
	Rffl	0.021966	-0.285837			Btbd10	3.80535e-08	-0.325658
	Lclat1	0.0140055	-0.286598			Mars	4.86697e-05	-0.326084
	Kdm4a	0.00792377	-0.286796			Ccser1	1.07443e-07	-0.326201
	Fyn	0.00160294	-0.287548			Ssx2ip	3.02937e-06	-0.326861
	LOC361646	0.00110552	-0.287569			Plekha7	0.000149107	-0.327093
	Ift81	0.00469138	-0.29028			Psme4	1.1858e-05	-0.327154
	Rbks	0.00234568	-0.290665			Ap5m1	9.9477e-06	-0.32718
	Rptor	0.00161276	-0.290792			Kif3b	1.61938e-07	-0.327314
	Efcab2	0.00143985	-0.291102			Ahcyl1	4.12108e-06	-0.327395
	Akap17a	0.00548661	-0.291545			Alkbh1	3.01318e-06	-0.327923
	Gars	0.00141	-0.291597			Tepp	3.81883e-05	-0.328042
	AABR07034767.1	0.00111411	-0.292935			Orc2	5.94108e-05	-0.328261
	Fbxl13	0.00243158	-0.292992			Ift74	2.7115e-05	-0.328447
	Fastk	0.0112473	-0.293303			Uimc1	1.91337e-05	-0.328605
	Sumo3	0.00104033	-0.293355			Nono	3.84147e-07	-0.32875
	Ift88	0.00788186	-0.293585			NEWGENE-1582771	7.65034e-06	-0.330665
	Vmp1	0.00274191	-0.29419			Camk2d	2.49107e-12	-0.330922
	B4galt1	0.0115747	-0.295288			Plekhf2	1.89007e-06	-0.331021
	Memo1	0.00400274	-0.295615			Ppp1r9a	0.00011672	-0.331265
	Npepo	0.00307591	-0.296215			Ankfy1	2.74478e-06	-0.331276
	Psrc1	0.00116741	-0.296662			Pitpnm3	5.53265e-08	-0.33154
	Hnrnph1	0.00278748	-0.296843			Polg2	5.9837e-06	-0.332367
	Zzz3	0.00412	-0.298972			Cdkl5	3.23552e-06	-0.332496
	Pde6d	0.00033246	-0.299706			Zcchc7	0.000189297	-0.332649
	Exoc6b	0.00041861	-0.299884			Sh3bgrl2	4.5507e-07	-0.332732
	Zfp692	0.00147674	-0.301164			Cited2	3.30387e-07	-0.33335
	Pola1	0.0044819	-0.301543			Clk2	5.15193e-05	-0.334061
	Eloa	0.0246711	-0.301952			Xpo4	1.05252e-05	-0.335097
	Far1	0.0181282	-0.30223			AABR07068272.1	2.02177e-05	-0.335155
	C2cd5	0.000265921	-0.302454			Epc2	6.04726e-06	-0.336777
	Fcf1	0.00410913	-0.302878			Optn	1.91508e-08	-0.33695
	Gpr137c	0.00889324	-0.303248			Akap6	2.3962e-05	-0.336984
	Tanc2	0.00111144	-0.303942			Uvrag	1.62393e-05	-0.33769
	Mdm1	0.00629826	-0.304925			Stx3	2.99134e-07	-0.337967
	Rbm33	0.000599242	-0.305177			Cog5	1.59246e-05	-0.338147
	Zc3h4	0.0001844	-0.305454			Tmx1	1.13198e-05	-0.338325
	Mif4gd	0.000578606	-0.306255			Zeb1	0.000706248	-0.340749
	Zcchc7	5.388e-05	-0.307041			Herc1	1.90593e-06	-0.340878
	Aig1	0.00352624	-0.307269			Sik2	3.26713e-05	-0.341728
	RGD1562136	0.0133751	-0.307369			Ubr2	8.34778e-06	-0.341934
	Znhit6	0.00534918	-0.307428			Abcc5	1.34035e-07	-0.342036
	Epc2	0.00288036	-0.307896			Cers5	6.65434e-06	-0.342112
	Rmc1	0.000847941	-0.309235			Baz2b	3.43495e-06	-0.342735
	Hpcal1	0.00981374	-0.309742			Fmr1	7.78982e-08	-0.343407
	Wdr33	0.000250922	-0.309906			Pde8b	9.37354e-06	-0.343692
	Ppp4r2	0.000754681	-0.309969			Tmpo	7.22547e-06	-0.344323
	Mef2d	0.000653849	-0.310079			Kpna1	3.81289e-05	-0.344421
	Nme3	0.000859043	-0.31042			Ube4a	2.33197e-06	-0.345153
	AABR07026112.1	0.00291309	-0.311015			Mpp4	1.39807e-07	-0.346121
	Leng8	0.00253497	-0.312273			N4bp1	3.9971e-05	-0.347304
	Phf8	0.000323304	-0.313013			Naa15	8.88992e-06	-0.347559
	Tmem216	0.000919767	-0.313435			Fam171b	1.63913e-06	-0.348219
	Snx2	0.00376965	-0.313745			Pcyt1b	2.06384e-05	-0.348523
	Zdhhc6	0.00154719	-0.314048			Thrb	8.55275e-07	-0.349044
	Gramd1b	0.00171697	-0.314095			AABR07064719.1	3.84208e-06	-0.349143
	Lig4	0.00304467	-0.314833			Galnt10	1.47499e-07	-0.350232
	Nbas	0.00035405	-0.31615			Fam89a	8.40608e-06	-0.350862
	Fance	0.00145621	-0.317822			Fnbp4	2.09345e-07	-0.351572
	AABR07021704.1	0.000889857	-0.318829			Diaph3	1.58043e-06	-0.35201
	Abcc5	0.000120237	-0.319452			Rsrp1	5.1688e-16	-0.352372
	Tia1	0.0018953	-0.320511			Pde8a	1.04561e-05	-0.352389
	Sfswap	0.00113167	-0.321856			Tpp2	1.83397e-06	-0.352541
	Rictor	0.000466577	-0.322028			Tjp2	7.91812e-08	-0.352957
	Rbm4b	0.000112609	-0.322904			Fundc2	1.73565e-07	-0.35349
	Mta2	0.00655528	-0.323553			Mpdz	1.62064e-07	-0.353645
	Per3	0.00167366	-0.324458			Dpf3	1.21504e-06	-0.353995
	Pcca	0.00012013	-0.324575			Usp15	6.54517e-06	-0.354086
	Lars	0.00625626	-0.324972			Zmynd8	3.29692e-09	-0.354437
	Ispd	0.0028538	-0.325489			AABR07044668.1	1.76395e-07	-0.355587
	Pitpnm3	0.0019613	-0.32651			Ube3a	1.26344e-06	-0.356028
	Ube2h	0.000103589	-0.327551			Grb10	1.02501e-05	-0.356493
	Ap5m1	0.00307936	-0.329014			Ralgapb	8.65496e-07	-0.356495
	AABR07002674.1	0.000581023	-0.329016			Supt5h	9.60793e-07	-0.356642
	Mfsd8	0.00057805	-0.329722			Bdp1	1.40849e-05	-0.356737
	Tmx1	0.000317193	-0.329904			Hnrnpf	7.47647e-08	-0.358427
	Acin1	0.000209153	-0.330997			Oga	1.39458e-06	-0.35845
	Alms1	0.000223591	-0.331523			Syt14	2.22287e-06	-0.358868
	Rbm4	0.000125387	-0.332195			Zfp207	3.44076e-07	-0.35889
	Chd2	0.000835643	-0.334002			Srsf2	4.23393e-12	-0.35898
	Aars	0.00344645	-0.334032			RGD1563888	3.0509e-07	-0.359524
	Mettl16	0.000640993	-0.334078			Taf1d	1.8899e-05	-0.360005
	Mapk8	0.000512852	-0.334233			Actn4	4.64073e-06	-0.360078
	Ctif	0.00378755	-0.335094			Rffl	4.08683e-07	-0.360635
	Dpm1	0.000273195	-0.335123			Sgk1	7.96179e-08	-0.361672
	Ublcp1	0.000797929	-0.335887			Mcf2l	1.59369e-06	-0.362266
	Glt8d1	0.000158654	-0.337791			Slc31a2	2.93854e-10	-0.363244
	Epm2aip1	0.000263608	-0.337828			Mms19	1.67054e-07	-0.363394
	Kat6b	0.00178706	-0.339129			Zfp292	5.35073e-07	-0.363748
	Nrxn3	0.00013891	-0.339488			Zfand5	5.11282e-06	-0.3644
	Gse1	6.7196e-05	-0.340074			Bbs2	5.43837e-07	-0.365331
	Med6	0.000313021	-0.341971			Slc16a1	8.32261e-07	-0.366311
	Bcat1	0.000141014	-0.342714			Ppef2	1.54093e-10	-0.36664
	Nrdc	0.00153327	-0.34424			Armh1	2.69903e-06	-0.367629
	AABR07034706.1	8.76066e-05	-0.345896			Ddit4	1.86445e-07	-0.370301
	Trip11	0.00108479	-0.347881			Wdr20	2.34689e-06	-0.370633
	Shroom4	0.000811823	-0.347897			Ptprk	7.00923e-08	-0.370667
	Sarnp	0.000645893	-0.348344			Abhd17b	1.74336e-06	-0.370791
	Mms19	0.00439364	-0.349781			Dyrk2	6.16379e-09	-0.371001
	Tbcel	0.000111543	-0.350486			Necab3	2.16724e-06	-0.37155
	Sh3glb1	0.00016684	-0.350654			Pnn	9.87079e-08	-0.372785
	Hsdl2	0.000452778	-0.351209			Gse1	1.06323e-07	-0.372857
	Nop58	0.000620109	-0.352154			Pcdh15	6.41973e-15	-0.373133
	Caap1	0.00234148	-0.352298			Cdk10	3.43626e-06	-0.37316
	Sos1	0.00152046	-0.35301			Oxr1	6.12064e-08	-0.373887
	Diaph3	6.61962e-05	-0.353984			Agpat5	8.0539e-08	-0.374267
	Rabep2	0.000926655	-0.355441			Ankhd1	8.42625e-08	-0.374494
	Prr3	0.000192487	-0.355933			Uchl5	1.47047e-07	-0.375999
	Wac	0.000188131	-0.356203			Pdss2	7.09206e-06	-0.376508
	Fmn1	9.32168e-05	-0.359365			AC106605.1	2.25042e-06	-0.37663
	Orc2	0.000492815	-0.359705			Tbcd	7.72242e-07	-0.377009
	Eprs	0.000680127	-0.35973			Grk5	3.37922e-06	-0.378301
	Epb41l5	0.00183715	-0.360288			Pxn	3.148e-07	-0.378302
	Erc2	0.000210974	-0.36059			Tdrd7	4.07892e-08	-0.379491
	Klhdc10	9.97345e-05	-0.362564			Pcf11	2.5846e-06	-0.380365
	Ntng2	0.000875338	-0.363258			Cdc73	1.5044e-05	-0.380562
	Anp32a	0.000550882	-0.363617			Mib1	4.69819e-07	-0.380779
	Dnmbp	0.000118889	-0.364349			B4galt1	1.03348e-06	-0.380999
	Dyrk1a	8.04715e-05	-0.36496			Zfc3h1	4.79018e-09	-0.381
	Ammecr1	0.0002065	-0.366179			Tbc1d8	1.01375e-08	-0.381688
	Abhd17b	0.000111565	-0.36769			Epb41l2	6.6379e-13	-0.381842
	Nktr	0.000178146	-0.367856			Msi1	1.24625e-11	-0.383107
	Kirrel1	0.000130371	-0.369947			Sec24a	7.11181e-08	-0.383559
	Mxd4	8.13568e-05	-0.372905			AABR07058539.1	6.32997e-06	-0.386535
	Zeb1	0.00120467	-0.375492			Plaa	1.81132e-07	-0.387876
	Hnrnpa2b1	0.000150401	-0.375642			Syt1	1.38281e-39	-0.388598
	Vps26c	6.11459e-05	-0.376044			Clk1	1.64791e-07	-0.389973
	Ddx3	0.00050686	-0.376812			Pkn2	1.09042e-06	-0.391138
	Fmr1	0.00181147	-0.379707			Nf1	7.49494e-07	-0.392434
	Mmd2	0.000295737	-0.381896			Srsf4	6.33211e-08	-0.392752
	Fbxo36	0.000118158	-0.382237			Lmbr1l	4.58297e-09	-0.394315
	Fam120a	6.51515e-05	-0.382897			Nim1k	2.85579e-09	-0.395453
	Xkr6	0.000127777	-0.384915			Tpr	4.39281e-07	-0.395672
	Mllt3	0.000321604	-0.391937			Fam120a	3.12865e-08	-0.39698
	AABR07001519.1	6.6473e-05	-0.391968			Yeats2	1.34408e-08	-0.397669
	Fam89a	7.0565e-05	-0.393671			LOC500948	2.2196e-06	-0.39856
	Psd	0.000148784	-0.397999			Hpcal1	9.06297e-06	-0.398727
	Btg1	0.000143861	-0.398266			Camk1d	1.5298e-11	-0.398806
	Nop56	0.00131462	-0.407684			Wdr7	1.194e-08	-0.398837
	Dpf3	8.92876e-05	-0.419644			Stard9	7.85518e-07	-0.398985
	Otub2	6.99988e-05	-0.427574			Pias1	2.05745e-07	-0.399999
						Med13l	1.00613e-10	-0.40067
						Stk35	1.0364e-07	-0.401348
						Zc3h4	5.54446e-08	-0.402068
						Dnajc18	5.61767e-07	-0.402096
						Trmt13	6.58473e-07	-0.402766
						Srrm1	2.10237e-07	-0.404142
						Arfgef1	1.08774e-09	-0.404343
						Tdp2	6.09786e-08	-0.404919
						Ttll5	2.04763e-09	-0.405593
						Nlk	2.05692e-17	-0.405886
						Ano2	9.47011e-14	-0.405921
						Mtmr3	2.10858e-08	-0.407007
						Iws1	7.20864e-08	-0.40793
						Phc3	9.71962e-08	-0.408371
						Sos1	5.56946e-07	-0.408896
						Raly	2.13033e-24	-0.410057
						Pla2g5	7.84307e-08	-0.41036
						AABR07034767.1	2.16812e-07	-0.410628
						Tet3	3.74801e-10	-0.410744
						Armh3	7.04584e-07	-0.411425
						Klhl12	1.4752e-05	-0.411454
						Carmil1	7.22933e-09	-0.411551
						Efcab2	2.18848e-06	-0.411589
						Wdr47	4.35613e-09	-0.413047
						Msr1	1.79456e-09	-0.413123
						Fbxl5	1.4355e-16	-0.414946
						Tspan5	2.62236e-09	-0.41515
						U2surp	1.2061e-08	-0.415169
						Pax4	9.48675e-11	-0.415305
						Camsap1	9.91319e-09	-0.416113
						Rsf1	4.68853e-06	-0.4163
						Mdm4	4.56013e-07	-0.416443
						Epb41	1.32709e-12	-0.418223
						Alms1	2.80123e-08	-0.418441
						Spata5	5.07866e-08	-0.421003
						Ccdc51	4.57308e-09	-0.42115
						Rmc1	3.37096e-07	-0.421295
						Ppp4r2	6.72099e-09	-0.422143
						Stat5b	5.06875e-08	-0.42304
						MAST1	3.98406e-08	-0.42449
						Casz1	1.46855e-08	-0.424588
						Xiap	3.42719e-08	-0.425357
						Pde6a	1.46787e-27	-0.425623
						Scarb1	6.56844e-11	-0.426527
						AABR07036331.2	1.5261e-08	-0.427682
						Cnot4	2.52986e-07	-0.427692
						Arhgap26	1.80521e-10	-0.428956
						Kif2c	9.99097e-09	-0.429036
						Arhgap39	1.07231e-07	-0.429108
						Scamp5	1.30703e-08	-0.429112
						Zscan26	1.79516e-08	-0.429231
						Nop58	1.98703e-07	-0.429545
						Rims2	4.36614e-21	-0.430451
						Arglu1	5.72547e-12	-0.430684
						AABR07001519.1	7.3363e-06	-0.43098
						Dtnb	2.31178e-10	-0.433296
						Csnk1g1	1.89885e-08	-0.433483
						Ubr3	1.02313e-08	-0.4336
						Ubc	7.91572e-17	-0.434724
						AABR07032622.1	3.84992e-10	-0.436291
						Cacna1f	2.98077e-14	-0.436929
						Ppp2r5e	2.60831e-12	-0.441935
						Utp3	2.37224e-10	-0.442346
						Bbs9	2.20792e-15	-0.442347
						Phip	2.86926e-07	-0.442745
						Snrnp70	5.72513e-16	-0.443238
						Gpatch8	2.23624e-12	-0.443947
						Fam161a	1.59093e-10	-0.444955
						Ankrd33b	1.34858e-15	-0.445401
						Zc3h11a	1.30484e-10	-0.447753
						Sel1l	3.14339e-11	-0.448968
						Fabp12	5.94978e-31	-0.451102
						Birc6	2.66102e-09	-0.45188
						Lrrc49	1.17341e-09	-0.452765
						Phf8	2.16529e-09	-0.454698
						Setbp1	9.27581e-09	-0.455358
						Dguok	4.99031e-09	-0.460753
						Ntng2	2.67702e-08	-0.461051
						Kpna5	2.34161e-09	-0.462026
						Rbm6	4.34804e-09	-0.462121
						Prr3	5.42459e-09	-0.463075
						Cdk13	8.05794e-11	-0.464515
						Crocc	4.53216e-12	-0.465431
						Fam210a	1.21962e-09	-0.466464
						Ipo9	1.95895e-08	-0.469175
						Ubtd1	6.17161e-10	-0.470852
						Acaca	5.82643e-10	-0.470898
						Tasp1	1.4008e-10	-0.472218
						Ankrd44	1.20677e-13	-0.473209
						Slc38a3	1.20092e-17	-0.474024
						Hnrnpa2b1	1.05589e-10	-0.475894
						Celf2	1.06962e-21	-0.476248
						Cplx4	3.36019e-30	-0.476283
						Cdan1	1.21959e-08	-0.476979
						Wdr33	2.268e-12	-0.478338
						Csgalnact2	6.72378e-10	-0.478339
						Ypel2	7.44264e-11	-0.479486
						Usp13	4.86309e-10	-0.479956
						St3gal1	4.61832e-12	-0.480473
						Wdr89	1.58932e-11	-0.481211
						Hipk2	3.65219e-11	-0.48142
						Sh3gl2	1.35525e-15	-0.48434
						Gramd1b	6.30463e-09	-0.484507
						Hcn1	1.12523e-32	-0.484565
						Sntg2	2.99895e-09	-0.485607
						Abca4	2.51059e-31	-0.487256
						Dnmbp	4.98345e-09	-0.488274
						Gpm6b	2.99932e-10	-0.48963
						Rabgef1	1.31479e-12	-0.490076
						Epc1	3.51199e-12	-0.490567
						Ppp2r5c	1.53211e-16	-0.490951
						Ispd	2.4294e-09	-0.495219
						Ktn1	1.38416e-10	-0.496051
						Atp8a2	1.08025e-15	-0.497057
						Dcps	1.90689e-12	-0.503398
						Gucy2d	6.4001e-12	-0.505556
						Atxn1	6.26004e-16	-0.505713
						Sag	3.80772e-66	-0.508025
						AABR07068851.1	5.8836e-18	-0.511063
						Dscaml1	7.02148e-19	-0.512298
						Acsl6	4.50176e-20	-0.515357
						Phlpp2	4.11968e-13	-0.515596
						Fam169a	3.00856e-13	-0.516033
						LOC100912181	6.24399e-13	-0.517193
						Cnst	3.99708e-12	-0.518821
						Cdc23	1.28053e-10	-0.521163
						Cep290	4.85678e-22	-0.521732
						Supt16h	2.08492e-12	-0.525247
						Stk39	2.99915e-09	-0.52542
						Snx29	8.14949e-10	-0.525492
						Sema7a	4.02218e-11	-0.527057
						Rp1	2.34193e-47	-0.52851
						Kcnb1	1.21897e-19	-0.530112
						Pde6g	1.32015e-12	-0.531315
						Cnga1	3.54447e-20	-0.531579
						Srsf5	8.77519e-13	-0.538815
						Slc16a6	1.98747e-12	-0.54052
						Kcne2	1.92873e-12	-0.540929
						Unc13b	2.54811e-15	-0.543507
						Tmem116	8.80616e-14	-0.546257
						Son	1.1689e-23	-0.546553
						Kirrel1	1.30585e-13	-0.549534
						Prpf4b	3.49771e-16	-0.556426
						Glb1l2	9.37651e-14	-0.55674
						Esrrb	1.26461e-12	-0.558388
						Dennd2c	1.70262e-12	-0.562094
						Macf1	4.56007e-20	-0.568591
						Trove2	8.97119e-16	-0.568958
						Anp32a	2.83809e-13	-0.569067
						Taok3	5.32378e-19	-0.57168
						Lnpk	2.64857e-13	-0.572097
						AABR07026641.1	4.81218e-11	-0.573184
						Pcmtd2	5.89639e-40	-0.573862
						Msi2	1.43484e-24	-0.574597
						Pnisr	3.73873e-19	-0.574815
						Tanc2	4.13368e-11	-0.578286
						Nxnl1	3.0476e-14	-0.580274
						Add3	1.5108e-16	-0.587083
						Gtf3c2	3.03189e-14	-0.587244
						Rapgef5	2.70766e-18	-0.588477
						Zdhhc6	8.5366e-14	-0.592478
						Kdm5c	5.8831e-16	-0.594849
						Tln2	3.98563e-17	-0.59489
						Itsn2	3.5035e-24	-0.598937
						Tacc2	7.7595e-17	-0.599308
						Uckl1	2.87615e-21	-0.599948
						Ppp1r10	1.05736e-16	-0.60002
						Nfyb	3.11476e-15	-0.600494
						Dlg4	1.8995e-17	-0.603462
						RGD1597339	6.73848e-39	-0.604945
						Dgke	3.37723e-17	-0.605952
						Slc29a1	1.17211e-15	-0.606634
						Alpl	1.4248e-16	-0.607432
						Osbp2	3.35538e-42	-0.608749
						Fhod3	1.00106e-21	-0.61821
						Srsf7	2.60852e-27	-0.620646
						Rrp1b	1.8511e-17	-0.621597
						Wdr17	4.51833e-36	-0.624586
						Nt5e	5.23304e-23	-0.625189
						Ddx17	5.37018e-17	-0.626461
						Gucy2f	6.56828e-23	-0.627591
						Mast2	1.18766e-21	-0.641695
						Stard7	4.61856e-27	-0.644765
						Srsf6	8.55693e-22	-0.645798
						Msh5	1.64945e-17	-0.651524
						Ttc39c	8.97997e-23	-0.652873
						Tra2a	8.99773e-20	-0.65953
						Gnb5	4.59829e-22	-0.660645
						Ddx5	2.93424e-56	-0.662912
						Cers4	2.63219e-25	-0.664014
						Shroom4	1.09928e-17	-0.673971
						Cabp4	3.88617e-50	-0.682468
						Mgat4d	6.0615e-16	-0.694941
						Plxna2	5.77645e-17	-0.705505
						Frmd4b	2.1059e-64	-0.708881
						Ric8b	1.49315e-24	-0.711357
						Nrl	7.89233e-26	-0.71208
						RGD1309540	3.40013e-17	-0.722103
						AABR07034706.1	9.18348e-21	-0.725446
						Fam53b	7.34335e-26	-0.725473
						Kdm4c	1.87109e-58	-0.726398
						Tulp1	3.68484e-115	-0.727657
						Klhl18	4.708e-28	-0.730772
						Pfkfb2	1.0321e-21	-0.748077
						Map4k3	8.42536e-22	-0.750552
						Pak7	5.03558e-17	-0.754304
						Sgip1	2.23611e-45	-0.775066
						Kras	3.37959e-22	-0.77679
						Rs1	3.16521e-29	-0.792899
						Sntb2	1.87314e-37	-0.795743
						Grk1	1.7258e-38	-0.799239
						Hk2	7.51293e-51	-0.808561
						Glmn	5.48822e-22	-0.810202
						Rgs20	2.00099e-30	-0.819896
						Cacnb2	8.56756e-74	-0.82093
						Herc3	3.98036e-45	-0.826234
						Arl4d	4.3546e-33	-0.827627
						Pde6b	1.33506e-90	-0.838733
						Slc6a6	4.58036e-51	-0.850585
						Dmd	3.33748e-105	-0.855894
						Prkca	1.02709e-44	-0.881738
						Add1	5.6053e-50	-0.889204
						Pla2r1	3.73437e-51	-0.942167
						Smarcd1	1.54774e-39	-0.978852
						2022-03-01	2.39761e-50	-0.998411
						RGD1560925	1.37803e-147	-1.04341
						Gnb1	7.87787e-227	-1.11306
						Itpr2	2.57741e-40	-1.14968
						Slc4a7	2.85534e-68	-1.1683

## Sheet: MG (cluster 4)
1M STZ vs Ctrl		p_val	avg_log2FC		2M STZ vs Ctrl		p_val	avg_log2FC		3M STZ vs Ctrl		p_val	avg_log2FC
	Rtn4	1.57274e-44	-0.793957			Crym	2.52011e-60	1.63798			Gfap	2.06882e-110	3.9728
	Gfap	2.74418e-36	3.0096			Cebpd	1.33237e-43	2.30958			Crym	3.28588e-105	1.83257
	Rlbp1	1.21664e-35	-0.892866			Clu	7.62512e-42	1.11936			Clu	7.10277e-81	1.18306
	Cebpd	2.72909e-35	2.4239			LOC108348061	9.879e-38	0.794417			Cebpd	3.72758e-78	2.18467
	Mt1	1.08069e-32	2.28233			Gria2	2.57656e-30	-1.16142			C1ql1	1.6681e-75	1.85769
	Glul	2.67273e-32	-0.778283			Agmo	3.84398e-30	-1.27979			Fth1	6.32133e-73	1.64405
	Rrh	6.79036e-27	-0.860876			Mt1	4.11084e-30	1.92651			Lgals3	3.04259e-71	1.88979
	Mt1m	1.75751e-26	1.62613			Gfap	2.97525e-29	2.26132			AC134224.3	1.02076e-69	-0.726456
	Espn	2.36848e-26	-0.956111			AC134224.3	2.32044e-28	-0.605175			Mt-co2	2.46701e-68	1.54392
	Col11a2	2.74318e-25	-1.34243			Samd12	3.0716e-28	-1.06462			Timp1	5.78114e-66	1.89718
	Hhatl	3.42047e-25	-1.38707			Tubb2b	4.7441e-27	1.43286			B2m	1.44533e-63	1.03788
	AABR07056636.1	3.20748e-24	-1.20505			Gpc6	6.83257e-27	-1.04918			Vim	3.00618e-61	1.07796
	Cp	3.73741e-24	1.52251			Tmem176b	4.32844e-25	0.997505			Tagln2	3.43518e-61	1.38013
	Dapl1	2.23553e-23	1.20658			Tmem176a	5.61997e-25	1.14192			Mt-co1	2.58657e-60	1.35581
	Omg	1.05863e-22	-1.30634			Dapl1	1.16193e-24	1.4154			Rps4x-ps9	2.05023e-57	1.29013
	Apoe	2.05216e-22	-0.591717			Timp1	1.17666e-23	1.90519			Tmem176a	1.31588e-55	1.34371
	Mt2A	2.61168e-22	1.77692			Ctsl	1.22358e-23	0.707794			Samd12	1.61175e-54	-1.45357
	Mgarp	4.74055e-22	-0.728122			Junb	1.84991e-23	1.19402			S100a10	2.86281e-53	1.82494
	Dclk1	5.52617e-22	1.29168			Nrxn3	1.85274e-23	-0.713414			Id3	2.05733e-51	-1.89229
	Samd12	2.14541e-21	-1.00864			Mt-co2	5.10311e-22	1.60207			Tpt1	3.38691e-50	1.08902
	Car2	6.57474e-20	-0.686272			Tmsb4x	5.25727e-22	0.809079			Serping1	9.7932e-50	1.20826
	Timp1	1.21185e-19	2.44269			Stab2	8.16781e-22	-1.09982			Rpl7	2.06755e-49	1.06479
	Cav1	3.14983e-19	-0.675977			Fth1	2.54091e-21	1.2765			Mt-co3	5.51859e-47	1.16389
	Tubb2b	3.71136e-19	1.2938			Tuba1a	4.51948e-21	0.763421			Mt-nd1	2.16732e-46	1.09027
	C1ql1	6.81431e-19	0.925641			Rrh	6.2579e-21	-0.642111			Pdlim4	3.35624e-46	1.2439
	Enox1	1.70604e-18	0.911231			Trhde	1.70207e-20	-0.78637			Hspb1	3.64527e-46	1.39454
	Stat3	5.62109e-18	1.00771			Cst3	1.9448e-20	0.700617			Tubb2b	5.78687e-46	1.31708
	Tmem176a	5.67566e-18	0.993491			C1ql1	6.1418e-20	1.19126			Dclk1	6.49113e-46	1.1655
	Id3	1.55014e-17	-0.996687			Hhatl	6.50371e-20	-0.995756			Rps16	2.51678e-45	1.09872
	S100a10	1.99754e-17	1.79694			AABR07056636.1	1.50724e-19	-1.05064			Mt-cyb	2.89164e-45	1.09643
	Slc3a2	2.04855e-17	0.709177			Eml6	2.18582e-19	-0.72264			Rpl32.1	1.87595e-43	1.02953
	Tagln2	2.10332e-17	0.900143			Rps4x-ps9	2.46445e-19	1.03579			Lcn2	1.14594e-42	1.53065
	Sorcs1	7.95033e-17	0.94235			Cdk17	2.56934e-19	-0.879143			Tmem176b	2.46492e-41	0.980094
	Crym	1.28578e-16	0.984402			Cd9	4.11127e-19	0.486001			Ifi27	3.67378e-41	1.27579
	Clu	3.28473e-16	0.917703			Lgals3	7.94669e-19	1.17845			Pdpn	3.82634e-41	0.988049
	Ckb	6.5914e-16	-0.497743			Il1rapl1	9.37739e-19	-0.663408			Crb1	3.63722e-38	-0.962167
	Qsox1	1.41552e-15	0.892303			AABR07056633.1	1.61361e-18	-0.957755			Cp	3.73636e-38	1.21495
	Msi1	1.63234e-15	-0.787453			LOC103693323	4.52817e-18	-0.74974			LOC100365839	4.92379e-38	0.905834
	Col2a1	1.7832e-15	-1.06885			Cp	4.93139e-18	1.22935			Rpl41	6.83172e-38	0.806823
	Tmsb4x	5.58669e-15	0.668299			Cd81	5.83196e-18	0.666102			Gnai2	1.1859e-37	0.730572
	LOC100359583	9.25424e-15	-0.55161			Prnp	1.60672e-17	0.690601			Id2	1.4333e-37	-1.57738
	Sfxn5	1.23659e-14	-0.7779			Mt1m	2.29672e-17	1.03041			Rbp4	2.91653e-37	0.931718
	Car14	3.35743e-14	-0.816812			Pnisr	2.4803e-17	-0.620341			Mt-atp6	3.34235e-37	0.864968
	Cmtm5	3.86673e-14	-0.885309			Msi1	2.82726e-17	-0.733982			Gria2	8.31842e-37	-1.26226
	Bcat1	3.98083e-14	-1.11516			Vim	4.25148e-17	0.684542			Prdx2	9.86483e-37	0.79394
	Slc14a1	1.22672e-13	1.07857			Luzp2	6.08541e-17	-0.830762			Lsamp	1.35502e-36	-0.968658
	Lgals3	1.94935e-13	0.556956			Mt2A	6.70814e-17	1.34067			Rplp0	1.87254e-36	0.853276
	Lcn2	2.9933e-13	1.87678			Espn	1.07832e-16	-0.604333			AC094217.1	2.15914e-36	0.974125
	Marcks	3.01832e-13	0.630578			Crb1	1.12892e-16	-0.593045			Mt-nd2	2.18257e-36	0.878964
	Gria2	7.03751e-13	-0.704732			Cntn4	1.2654e-16	-0.750061			Marcks	3.92474e-36	0.793638
	Id2	7.1273e-13	-0.860258			S100a10	1.96382e-16	1.15012			Trhde	1.01014e-35	-1.06712
	Tnfrsf12a	1.08821e-12	0.722763			Dgkb	3.57492e-16	-0.694291			Rpl23	1.03482e-35	0.919546
	Adamtsl4	2.98317e-12	0.565535			Mgst3	9.0245e-16	0.933562			RGD1562420	1.71382e-35	0.90406
	Col5a3	3.7018e-12	0.738874			Cox8a	1.09232e-15	0.806671			Rab3b	4.76349e-35	0.936813
	LOC100364435	4.69039e-12	0.791858			Lsamp	1.18297e-15	-0.57555			Carhsp1	6.14557e-35	0.967257
	Prss56	6.89356e-12	-1.57508			Gpm6a	1.46028e-15	-0.425684			AABR07056636.1	6.53102e-35	-1.42526
	Pon2	7.56435e-12	-0.54997			Ifi27	1.49998e-15	0.939095			Ndfip1	1.75982e-34	0.578626
	Plekhb1	9.2738e-12	-0.714973			Nlgn1	1.67112e-15	-0.490281			Stat3	3.04811e-34	0.930216
	AABR07056633.1	9.79632e-12	-0.819455			Tagln2	2.00383e-15	0.717185			Cox8a	3.32362e-34	0.767793
	Cox4i2	1.58736e-11	-0.805497			LOC100364435	1.11948e-14	0.85531			Mt-nd4	4.16539e-34	0.850909
	Ctsh	1.98766e-11	-0.615359			Pdpn	1.54629e-14	0.747395			Uba52	7.85861e-34	0.814703
	Pdlim4	6.01377e-11	0.841853			Omg	1.59173e-14	-0.75299			Gpx4	1.56786e-33	0.694399
	Pdpn	7.82961e-11	0.874897			Ust	2.49494e-14	-0.779476			Rrh	2.27839e-33	-0.752901
	Ano6	1.13342e-10	0.670191			B2m	2.76908e-14	0.681833			Tmtc2	6.62629e-33	-0.803908
	Tspan3	1.48142e-10	-0.479895			Pebp1	1.0467e-13	0.593629			Mt2A	6.90659e-33	1.29256
	Dusp6	3.55992e-10	0.656325			Jun	1.12632e-13	0.818308			Dcakd	2.03739e-32	0.961626
	Olfm1	4.00138e-10	-0.806531			AABR07001061.1	1.30054e-13	-0.873432			Rps10l1	4.15575e-32	0.789205
	Gpr37	5.88244e-10	-0.442769			Id2	1.45475e-13	-0.759308			LOC100362027	4.51255e-32	0.796361
	Klf6	6.8429e-10	0.936095			S100a16	3.45463e-13	0.691223			Rpl14	1.63463e-31	0.768107
	RGD1565033	7.36282e-10	-0.655094			H3f3a	4.89241e-13	0.56315			Mzt2b	2.81354e-31	0.787013
	Ptprn	8.24622e-10	0.611301			Sparc	5.08695e-13	0.553331			Il1rapl1	5.2451e-31	-0.788039
	Ddx5	1.09247e-09	-0.437956			Slc25a4	7.78897e-13	0.453281			Nlgn1	6.23297e-31	-0.647003
	Tmem176b	1.18268e-09	0.545737			Rpl41	9.2991e-13	0.866825			AABR07072400.1	9.56787e-31	0.877858
	Pllp	1.22627e-09	0.363734			Id3	1.04286e-12	-0.668065			Rps18l1	9.96416e-31	0.841836
	Pdyn	1.67902e-09	0.399608			Pdlim4	1.07967e-12	0.761846			S100a16	1.14415e-30	0.802254
	Nkd1	4.08438e-09	-0.638889			Col2a1	1.3227e-12	-0.746646			AC128960.1	1.64161e-30	0.819265
	Txnip	4.16341e-09	0.683868			Pld5	1.37585e-12	-0.683228			Sparc	1.6813e-30	0.622869
	Plce1	4.26442e-09	0.522216			Sfxn5	1.74493e-12	-0.519182			Rps9l1	1.75062e-30	0.782863
	Dio1	4.39072e-09	-0.549164			Frmd4b	2.34876e-12	-0.616892			Serf2	1.85073e-30	0.836409
	Erp29	4.45131e-09	-0.60412			Mt-co1	3.11836e-12	0.874693			Calm3	2.06347e-30	0.814125
	Taf13	4.53742e-09	-1.04285			Dclk1	4.49788e-12	0.907857			Mrps6	2.18092e-30	0.911597
	Slc26a2	6.13076e-09	0.345336			Prdx2	4.61229e-12	0.633888			Hspa2	3.31451e-30	0.887795
	Gria1	6.54755e-09	0.508267			Hopx	5.60402e-12	0.648164			LOC100364435	4.96178e-30	0.815982
	Carhsp1	9.03564e-09	0.633087			Tubb2a	5.65787e-12	0.699778			Glul	4.97797e-30	-0.533025
	Cd81	1.05099e-08	0.50561			Mt-cyb	6.08406e-12	0.803553			Gpm6a	7.93727e-30	-0.557766
	Acsl6	1.10678e-08	-0.65815			Zbtb20	7.09072e-12	-0.510185			Rtn4	9.70224e-30	-0.472702
	Gpm6b	1.31681e-08	0.479293			Pde4d	8.36066e-12	-0.51807			Klf6	1.24569e-29	1.2
	Oaf	1.50308e-08	-0.519081			Tmtc2	1.26369e-11	-0.481899			Mt1m	1.37757e-29	0.948879
	Pnpt1	1.66412e-08	-0.807785			Bcat1	1.27155e-11	0.8965			LOC691807	2.49556e-29	0.746133
	Atp6v0c	1.73456e-08	-0.404936			Csmd2	1.44474e-11	-0.553986			Pebp1	3.9487e-29	0.664647
	Gpnmb	2.06133e-08	0.32418			Gpx4	1.47841e-11	0.589334			Rpl29	4.12211e-29	0.781806
	Sec11c	2.14282e-08	0.42029			Msi2	2.01828e-11	-0.474738			Pllp	5.0644e-29	0.662673
	Uxt	2.18658e-08	-0.644165			Marcks	2.08608e-11	0.690501			Crip2	6.69973e-29	0.852547
	Rnd3	2.31034e-08	0.694687			Rpl23	2.22462e-11	0.757896			Rps3	9.34147e-29	0.77313
	Eif4g3	2.4656e-08	0.485094			Btg2	2.31775e-11	0.737734			Mt1	2.51068e-28	1.40911
	Prss23	2.88665e-08	0.500545			LOC691807	2.92396e-11	0.628692			Gpc6	3.57881e-28	-1.07723
	Zhx2	2.90945e-08	-0.784877			Rbp4	3.83618e-11	0.600148			LOC100360117	5.08148e-28	0.776319
	Bsg	2.93103e-08	-0.372737			LOC108351063	4.40556e-11	-0.7481			Ywhaq	7.03641e-28	0.702475
	Per3	3.46126e-08	-0.52493			AABR07042840.1	4.71185e-11	-0.810339			LOC108351063	1.05701e-27	-1.24554
	Slc12a2	3.71327e-08	0.519546			Cav1	4.99151e-11	-0.4773			Ogfrl1	1.16025e-27	0.779289
	AC128848.1	3.81221e-08	1.01593			Add3	5.55432e-11	-0.539765			Omg	1.34141e-27	-1.09864
	Oca2	3.94469e-08	-0.619337			LOC108351137	7.57956e-11	0.567523			Cnn3	1.42229e-27	0.694334
	Hes1	4.66782e-08	-0.667041			Ndfip1	7.74532e-11	0.38935			LOC108348061	1.90887e-27	0.467937
	AABR07026997.1	4.79728e-08	0.513743			Slc26a7	9.61267e-11	-0.666072			LOC100363469	2.6412e-27	0.753103
	Tspo	5.40539e-08	0.322888			Laptm4a	1.06694e-10	0.423906			Neo1	3.02567e-27	-1.08312
	Gabrb1	6.23641e-08	-0.647527			Serping1	1.22082e-10	0.536505			Mgst3	3.0877e-27	0.928538
	LOC108351063	7.58288e-08	-0.875899			Lcn2	1.28636e-10	0.967131			AABR07056633.1	3.6794e-27	-1.14839
	Gpld1	8.32446e-08	-0.53348			Rpl7	1.39418e-10	0.658789			Rhob	8.43399e-27	1.00523
	Nckap5	9.38655e-08	0.496825			Ddah1	1.39621e-10	0.558908			AABR07071891.2	9.7988e-27	0.758587
	Cebpb	1.035e-07	0.873645			Rims1	1.64727e-10	-0.588353			LOC100360413	2.62918e-26	0.72701
	Etv5	1.11233e-07	0.40999			Cox4i1	1.88171e-10	0.555648			Cd81	2.80615e-26	0.693288
	Abcg3l3	1.11787e-07	0.430987			Mt-nd3	2.00571e-10	0.952213			Msi2	3.43811e-26	-0.716932
	Ctsc	1.13824e-07	0.652579			Hspb1	2.11666e-10	0.431854			Eml6	5.02458e-26	-0.89002
	Cadps	1.22856e-07	-0.675844			Rpl3	2.45532e-10	0.739672			Tmsb4x	5.17495e-26	0.745851
	Cmtm8	1.31335e-07	0.408264			Pld2	3.23608e-10	-0.671629			Dmd	5.29003e-26	-0.77562
	Frmd4b	1.39411e-07	-0.496478			Gnao1	3.78317e-10	-0.640055			LOC100362830	5.46146e-26	0.779938
	Cpne8	1.57535e-07	0.575706			Cdh13	4.52834e-10	0.613183			Gltp	6.22807e-26	0.729828
	St6galnac3	1.65533e-07	0.481251			Sntb1	5.28997e-10	-0.599813			Col11a2	7.60691e-26	-1.0736
	Ifrd1	1.78839e-07	1.03908			Acaa2	6.60118e-10	0.60686			Selenof	1.09308e-25	0.53309
	Slc7a5	1.85642e-07	0.559922			AABR07041096.1	6.9764e-10	-0.62542			LOC100911295	1.26637e-25	0.72689
	Gpc6	2.57468e-07	-0.510552			Mt-nd4	7.12816e-10	0.93433			Nme2	1.33189e-25	0.753128
	Ifnar2	2.68523e-07	0.42528			Nme2	7.85063e-10	0.779166			Txnip	1.84365e-25	0.931107
	Gramd1c	2.78424e-07	0.291529			Luc7l2	1.14238e-09	-0.549243			Rhoc	1.85141e-25	0.673405
	Spcs2	3.24135e-07	-0.46828			Rpl29	1.15551e-09	0.57475			Arl2bp	2.34147e-25	0.747602
	Mrps6	3.61758e-07	0.596285			Cebpb	1.4847e-09	0.735136			Agmo	2.38831e-25	-1.25605
	Lamp2	3.70052e-07	0.424037			Carhsp1	1.48652e-09	0.735106			Clvs1	2.59896e-25	-1.7171
	Slc26a7	3.76502e-07	-0.592298			Rps10l1	1.53991e-09	0.581812			LOC108349548	3.15131e-25	0.716858
	Casc4	4.07125e-07	0.553076			Glrb	1.53997e-09	-0.555723			Oscp1	7.31241e-25	0.686775
	Mt3	4.13519e-07	0.65287			Slmap	1.616e-09	-0.501329			Ifitm3	7.86047e-25	0.869789
	Vamp1	4.45509e-07	-0.674911			AABR07044198.1	1.81514e-09	-0.411921			LOC108349606	1.24583e-24	0.759385
	Ctsl	4.51636e-07	0.401942			Sned1	1.90062e-09	-0.626228			Tnfrsf12a	1.30305e-24	0.813049
	Agt	4.52544e-07	-0.530357			Zhx2	1.91143e-09	-0.667368			Pfn1	1.31261e-24	0.702292
	Rnf19b	4.53536e-07	0.681059			Col11a2	2.59399e-09	-0.422729			Rpl19	1.43983e-24	0.74747
	Ctsz	4.82965e-07	0.343201			Tox	2.83745e-09	-0.513434			Rps27a	1.51258e-24	0.722981
	Flot1	5.13289e-07	0.526888			Ptprd	3.06175e-09	-0.417124			Nrxn3	1.68829e-24	-0.666335
	Ifitm3	5.66811e-07	0.463481			Galnt13	3.15104e-09	-0.513742			S100b	1.907e-24	0.830309
	Tshr	5.84621e-07	0.529534			Dach1	3.19385e-09	-0.410931			RT1-A1	2.54676e-24	0.808519
	Chka	5.93821e-07	0.639916			Rplp0	3.2569e-09	0.710628			Anxa5	2.75109e-24	0.782688
	Id4	6.20901e-07	-0.60708			Dmd	3.42617e-09	-0.403107			Snn	2.80024e-24	0.708132
	Efhd1	6.3031e-07	-0.644239			LOC689574	4.31276e-09	0.595377			Csrp1	3.4198e-24	0.692157
	Mt-nd6	6.59883e-07	0.551266			Fos	4.62532e-09	0.546513			Park7	6.52044e-24	0.634728
	Eno1	7.5734e-07	-0.291979			Wdpcp	4.74594e-09	-0.568162			RGD1562402	1.0169e-23	0.750288
	Gdpd2	7.60276e-07	0.617389			S100a6	4.81823e-09	0.51365			Gabrb1	1.67869e-23	-1.1386
	Fgfr1	8.0955e-07	0.428076			Son	4.95355e-09	-0.449183			Msi1	2.272e-23	-0.716805
	B2m	8.58842e-07	0.620991			Neo1	5.28769e-09	-0.571186			Dapl1	2.62826e-23	1.24993
	Asns	8.66644e-07	0.316567			Rbm5	5.83479e-09	-0.456803			C1s	2.89767e-23	0.636179
	Csmd2	8.95046e-07	-0.629922			Ank3	8.12366e-09	-0.412988			Atp5mc2	4.18869e-23	0.623137
	Sbno2	9.65307e-07	0.461714			Nlk	8.28649e-09	-0.540615			Cyr61	4.31779e-23	1.01195
	Acyp2	1.01205e-06	-0.495535			S100a4	8.85424e-09	1.06441			Cpne8	5.095e-23	0.755052
	LOC103693323	1.12082e-06	-0.48183			Cpne8	9.07303e-09	0.656917			Rpl15	5.54054e-23	0.639064
	Six3	1.32957e-06	-0.443847			Dennd1a	1.18176e-08	-0.480515			Galnt13	7.68692e-23	-0.933408
	AABR07060833.1	1.34223e-06	0.419744			Rpl14	1.34435e-08	0.585432			Myl12b	8.90902e-23	0.674987
	Sntg2	1.606e-06	0.54923			LOC100363268	1.35604e-08	0.601623			Mfge8	1.68937e-22	-0.702923
	Akap12	1.64579e-06	0.743637			Gstp1	1.38094e-08	0.634461			Rpl10	1.93579e-22	0.700821
	Jak1	1.65402e-06	0.438799			Gabrb1	1.38487e-08	-0.518065			Fgf2	2.13928e-22	0.708116
	Lhx2	1.79389e-06	-0.375613			AABR07031533.2	1.48485e-08	-0.505714			AABR07058158.1	2.27978e-22	0.630427
	Dbp	1.94801e-06	-0.432343			Cfl1	1.50166e-08	0.502466			AABR07068955.1	2.68417e-22	0.634937
	Tecr	2.18083e-06	-0.470753			Rlbp1	1.61371e-08	-0.322437			AABR07019341.1	3.24619e-22	0.660426
	Srsf3	2.1878e-06	-0.471539			Car14	1.96966e-08	-0.433249			Pdyn	3.81368e-22	0.598415
	Ciart	2.23972e-06	-0.585014			Sema3e	2.37635e-08	-0.416418			Csmd2	4.82963e-22	-1.02709
	Crip1	2.26786e-06	0.303729			Fosb	2.63419e-08	0.453039			Cdh13	5.42391e-22	0.659258
	Cd276	2.28089e-06	0.282249			Rbm41	3.09616e-08	-0.499325			Ifitm2	9.14502e-22	0.59228
	AABR07042840.1	2.40722e-06	-0.652201			Rps3	3.11617e-08	0.600618			LOC100360573	1.21662e-21	0.713166
	AABR07025010.1	2.51459e-06	-0.585174			Vipr2	3.48421e-08	-0.541137			Sbno2	1.22942e-21	0.714964
	AABR07070555.1	2.63004e-06	-0.528988			Galnt7	3.5509e-08	-0.516395			Rpsa	2.00517e-21	0.661722
	Nr4a1	2.63209e-06	-0.634978			Rps16	3.56436e-08	0.629336			Pea15	2.14325e-21	0.621298
	Psme4	2.6452e-06	0.443834			Gnai2	3.82346e-08	0.442291			Shisa5	2.19913e-21	0.636312
	Uba52	2.68931e-06	0.519876			Gbf1	3.95933e-08	-0.638534			Psme1	3.39155e-21	0.675226
	Dpp6	2.79649e-06	0.471413			Col22a1	4.02153e-08	-0.468539			Ust	4.42849e-21	-0.962132
	Slc7a11	2.81299e-06	0.718535			Ube2e3	4.17098e-08	0.447032			Hhatl	5.74976e-21	-1.14051
	Serping1	2.86708e-06	0.325923			Mrfap1	4.7314e-08	0.49395			Gng10	7.52299e-21	0.626263
	Eif4ebp1	3.02466e-06	0.417159			Tspo	4.87168e-08	0.428796			Cox6c	9.60392e-21	0.621341
	Slc38a3	3.05439e-06	-0.34366			LOC100911295	4.91914e-08	0.564049			Ywhae	1.11593e-20	0.520557
	Col25a1	3.48746e-06	0.499875			Cntf	4.93623e-08	0.556953			Rps29	1.51426e-20	0.636282
	AABR07031533.2	3.5632e-06	-0.537302			Fbxw4	5.18712e-08	-0.5473			LOC103689961	1.51967e-20	0.699753
	Zfp423	3.79111e-06	-0.512023			Hacd2	5.33567e-08	-0.364858			Rims1	1.69726e-20	-1.09183
	Nfkb1	3.79244e-06	0.539275			Prpsap1	5.39207e-08	0.628673			Myl12a	1.69839e-20	0.591452
	Limch1	3.84392e-06	0.470995			Mrps6	5.53039e-08	0.704144			Map1lc3a	1.94976e-20	0.652384
	Stc1	3.95149e-06	0.295047			Hint1	6.72821e-08	0.555459			Cd63	2.85713e-20	0.560528
	Gas6	4.38332e-06	0.380461			Lamp2	7.36134e-08	0.399158			Nedd8	3.03752e-20	0.604924
	Fam184b	4.52969e-06	-0.584898			Slc25a21	7.87981e-08	-0.45847			Atp5f1e	3.38339e-20	0.573696
	Lpp	4.69764e-06	0.417135			Pllp	7.94195e-08	0.373693			Myzap	4.2665e-20	0.585746
	Vegfa	4.86488e-06	-0.711737			Rras	7.98954e-08	0.603484			Tox	4.37657e-20	-0.829963
	Tmcc3	4.93591e-06	0.481273			Thsd7a	8.22192e-08	-0.39478			Sp5	1.34633e-19	0.431074
	Txndc15	5.11855e-06	-0.414575			Nfia	8.39456e-08	-0.41112			Slc14a1	2.20291e-19	0.695256
	Rhob	5.39426e-06	0.637351			Sec11c	9.60498e-08	0.368342			Rplp0l1	2.25154e-19	0.467863
	Mt-nd4l	6.80158e-06	0.464651			Slc3a2	1.00331e-07	0.404692			Cebpb	2.39176e-19	0.975632
	Mt-nd3	6.82179e-06	0.460292			Ephb1	1.02847e-07	-0.606414			LOC103690015	2.67701e-19	0.649914
	Bin1	7.41954e-06	0.423905			Klhl32	1.07021e-07	-0.502648			Pnisr	2.77611e-19	-0.644553
	Dkk3	8.19568e-06	-0.273311			Myo5b	1.08764e-07	-0.542933			Rida	3.11589e-19	0.661424
	Dpm1	8.3676e-06	-0.498967			Tox2	1.09426e-07	-0.528156			Ddah1	3.30352e-19	0.612626
	Igf2	9.97977e-06	-0.455112			Cstb	1.11569e-07	0.613089			Eif5a	4.50927e-19	0.576608
	Aph1b	1.00316e-05	-0.486136			AABR07035916.1	1.13673e-07	-0.525681			Rps5	6.68863e-19	0.608169
	Rpl41	1.02181e-05	0.56003			Tmpo	1.18242e-07	-0.38908			AABR07026997.1	7.01484e-19	0.502644
	Neo1	1.04004e-05	-0.518154			Cldn9	1.20527e-07	0.655847			LOC100363452	1.04392e-18	0.619503
	Rcn1	1.08369e-05	0.406423			AC128848.1	1.25386e-07	0.812921			Luzp2	1.25187e-18	-0.894487
	Slmap	1.12649e-05	-0.365903			Plekha7	1.28013e-07	-0.555081			Bst2	1.35698e-18	0.54516
	Trib1	1.28044e-05	0.485123			Id4	1.29476e-07	-0.423488			Rnf19b	1.6948e-18	0.633146
	Tmem159	1.30939e-05	0.485189			Adamtsl4	1.37438e-07	0.399808			Rpl11	2.07296e-18	0.579528
	Psat1	1.40104e-05	-0.361516			Ctnnd2	1.3777e-07	-0.451151			Slc44a2	2.1403e-18	0.544555
	Plcd3	1.44878e-05	0.270953			Slc14a1	1.63723e-07	0.649452			Laptm4a	2.24497e-18	0.402821
	Tox2	1.47508e-05	-0.464211			Spon1	1.86749e-07	-0.376015			Tma7	2.44266e-18	0.517769
	Kif5b	1.50993e-05	-0.452763			Rpl15	1.88898e-07	0.487864			2024-03-02	2.62844e-18	0.593667
	Plat	1.62608e-05	0.59996			Eif4a2	2.0059e-07	-0.473643			Ctsz	3.54871e-18	0.437167
	Cdk17	1.6693e-05	-0.462776			Pfn1	2.06768e-07	0.547041			Rpl3	3.69155e-18	0.586814
	Ccdc13	1.70695e-05	-0.45236			Ap1s2	2.10602e-07	-0.519183			Chi3l1	5.12764e-18	0.934295
	Eif1b	1.73505e-05	-0.490256			Anxa5	2.13443e-07	0.593984			AC120310.1	6.47665e-18	0.64242
	LOC108351137	1.80165e-05	-0.424702			Fam184b	2.22248e-07	-0.476291			LOC100360522	6.5216e-18	0.626027
	Spidr	1.81287e-05	0.484961			Grik2	2.47557e-07	-0.515067			Thsd7a	7.36219e-18	-0.602016
	LOC297756	1.81426e-05	0.344307			Cacnb4	2.82889e-07	-0.596423			Ncald	7.70523e-18	0.697598
	2024-03-02	1.86836e-05	-0.505905			Slc38a3	3.04164e-07	-0.327596			Map1lc3b	1.47408e-17	0.620287
	LOC100363452	1.91283e-05	0.480463			Rora	3.12419e-07	-0.543985			Rpl17	1.58749e-17	0.568256
	Vav3	1.93699e-05	0.593418			Oscp1	3.21723e-07	0.522018			Atp6v1g1	1.62124e-17	0.466331
	Plin2	1.9395e-05	0.847416			Eif5a	3.21755e-07	0.46892			Dgkb	1.77655e-17	-0.662517
	Gltp	2.03292e-05	0.471426			RGD1562420	3.26971e-07	0.587922			Cntn4	2.19475e-17	-0.856749
	Efcab2	2.10892e-05	-0.25138			Glis3	3.45511e-07	-0.574866			Hint1	2.27857e-17	0.581176
	LOC103694169	2.15761e-05	0.464466			Stat3	3.67744e-07	0.578516			Sbspon	2.27911e-17	0.465227
	Oat	2.16234e-05	-0.535018			Uba52	3.70932e-07	0.535237			Ptprd	2.71849e-17	-0.57879
	Grn	2.17156e-05	0.384763			Atp6v1g1	3.72284e-07	0.412306			Mcam	3.06597e-17	0.458399
	Gmpr	2.29392e-05	0.352798			Spire1	3.79737e-07	-0.503653			Scg2	3.08612e-17	1.28315
	Nme2	2.51123e-05	0.471854			Nipal2	3.81126e-07	-0.390293			Lap3	3.45689e-17	0.587084
	Fgf2	2.54206e-05	0.497787			Pnkd	3.9228e-07	0.461332			LOC103693323	4.19411e-17	-0.700639
	Sulf1	2.54859e-05	0.33822			Eif1	4.04175e-07	0.370063			AABR07031666.1	4.38634e-17	0.543727
	Alcam	2.73416e-05	0.545083			Lgals1	4.35783e-07	0.528555			LOC100364457	4.91758e-17	0.545623
	Fbxl21	2.74368e-05	0.30903			Clasp2	4.59387e-07	-0.427472			Rras	5.34045e-17	0.566039
	Col9a1	2.74538e-05	-0.444494			LOC100364457	4.65749e-07	0.61158			Enox1	5.43848e-17	0.627532
	Qprt	2.75099e-05	0.302061			Cyr61	4.67035e-07	0.731687			Ifrd1	5.83072e-17	0.7774
	Vamp3	2.91374e-05	-0.532896			Calm3	4.70002e-07	0.511724			Atox1	5.97315e-17	0.565048
	Tnfrsf1a	2.99406e-05	0.288775			Lap3	4.74533e-07	0.539658			LOC498555	7.41223e-17	0.4597
	Col9a3	3.04595e-05	-0.424158			AABR07072400.1	5.01599e-07	0.589129			Frmd8	9.50105e-17	0.564974
	Scara3	3.04645e-05	0.459546			Abca8a	5.36059e-07	-0.371174			Cfl1	1.04991e-16	0.494826
	Atf5	3.13079e-05	0.394861			Jund	5.38258e-07	0.551298			Hephl1	1.11292e-16	-0.97868
	Dbi	3.1887e-05	0.415513			Actb	5.59572e-07	0.36743			Cdk17	1.14493e-16	-0.822812
	Atp1b2	3.2132e-05	-0.328165			Dner	5.711e-07	-0.430251			Flot1	1.14647e-16	0.581841
	Cdc42ep4	3.34833e-05	-0.549073			Tcf4	5.72845e-07	-0.354086			Sdcbp	1.19321e-16	0.544606
	Adamts5	3.67975e-05	0.447271			LOC100362027	5.81615e-07	0.529757			Car14	1.65385e-16	-0.922864
	Gsta6	3.69303e-05	0.428017			Cdon	5.87132e-07	-0.445552			AC141489.1	1.67816e-16	0.574904
	AABR07071891.2	3.69404e-05	0.380382			Reep5	6.06937e-07	0.480164			Ddah2	1.80984e-16	0.539368
	Dab1	3.73864e-05	0.450139			AABR07033882.1	6.4484e-07	-0.494812			Mt-nd5	1.91233e-16	0.491667
	RT1-A1	3.84636e-05	0.365003			Ric3	6.52982e-07	-0.31881			Slc26a2	2.03675e-16	0.446305
	Hsp90ab1	3.90442e-05	-0.339505			Rpl18	6.60354e-07	0.448156			Nlk	2.94038e-16	-0.84957
	P3h3	3.92947e-05	-0.466249			Arhgef40	6.66974e-07	-0.474099			AC134224.2	2.97341e-16	-0.75198
	Ssbp4	3.93087e-05	0.401508			Mien1	6.9598e-07	0.490166			Mien1	2.98406e-16	0.537911
	Rps15	3.9828e-05	0.419664			Negr1	7.3248e-07	-0.435435			RGD1305645	3.00131e-16	0.533755
	Klf13	4.01475e-05	0.288885			Tom1l2	7.38046e-07	-0.506378			Uqcr11	3.8305e-16	0.549822
	Plxdc2	4.17745e-05	0.458719			Reck	7.41052e-07	-0.359363			Phlda3	4.34786e-16	0.372903
	Rassf9	4.25399e-05	0.307993			Aph1b	7.55905e-07	-0.468611			Qsox1	4.79786e-16	0.606458
	Crcp	4.54332e-05	0.359632			Dcakd	7.7492e-07	0.571792			Mt-nd6	4.87981e-16	0.482026
	Cyp26a1	4.5749e-05	0.662392			Vegfa	7.77289e-07	-0.513099			Lgals1	5.2192e-16	0.496577
	Gmpr2	5.01652e-05	-0.427253			Gstt3	8.29678e-07	0.536557			Nav1	6.75595e-16	0.544816
	Ush1c	5.1188e-05	-0.424254			Pea15	8.347e-07	0.420747			LOC299282	6.87529e-16	0.753742
	Setbp1	5.69526e-05	0.274604			Cnksr2	8.4812e-07	-0.591204			Pmepa1	7.18577e-16	-1.17036
	Hspa2	5.85824e-05	0.515313			Gdpd2	8.87674e-07	0.532593			Rpl22	7.28529e-16	0.529491
	Atox1	5.86539e-05	0.426104			Tspan18	9.4904e-07	-0.469225			Rpl27a	7.47778e-16	0.54815
	Chst11	5.86853e-05	0.343152			Crip2	9.5237e-07	0.50155			Cavin3	7.67256e-16	0.453729
	B4galt5	5.97703e-05	0.341135			Jpt1	9.76697e-07	0.521461			Wnt10a	7.74524e-16	0.446548
	Cadm3	5.99199e-05	-0.476102			Itm2b	9.91473e-07	0.269327			Gpx1	7.79567e-16	0.433644
	AABR07058658.1	6.17715e-05	0.353407			Ptgr1	1.03374e-06	-0.411787			S100a4	8.91785e-16	0.826387
	Cox8a	6.21156e-05	0.430866			Ndufb9	1.17286e-06	0.491007			Rnd2	9.4075e-16	0.548793
	AC128960.1	6.76433e-05	0.43883			Nell1	1.20792e-06	-0.427056			Litaf	9.96695e-16	0.442451
	Utrn	6.81461e-05	0.50304			Fer	1.22721e-06	-0.431995			LOC297568	1.14272e-15	0.472396
	Tectb	6.90782e-05	0.29096			AABR07032496.1	1.31703e-06	-0.57117			Gpr37	1.23649e-15	-0.492872
	Sntg1	7.17248e-05	0.419152			Ankrd35	1.38126e-06	-0.401539			Cdh2	1.59223e-15	-0.551866
	Tcf4	7.19869e-05	-0.302141			Colgalt2	1.40667e-06	-0.395295			Naca	2.23095e-15	0.486506
	AABR07054319.1	7.26487e-05	0.304852			Ifitm3	1.44441e-06	0.45148			Cstb	2.52582e-15	0.528072
	Aldoc	7.30509e-05	-0.290151			Rps18l1	1.44454e-06	0.511784			Clrn1	2.85602e-15	0.497322
	Fbn2	7.57859e-05	0.424998			Ran	1.4493e-06	0.421834			Atp5mg	3.04037e-15	0.477216
	Grin2c	7.62935e-05	-0.44853			Tpt1	1.45356e-06	0.635555			LOC103694169	3.16069e-15	0.52781
	Slc25a4	7.86156e-05	-0.259175			Cd63	1.46286e-06	0.459937			Tmem134	3.42453e-15	0.4493
	Slc13a5	7.99032e-05	0.332984			Magi3	1.46622e-06	-0.444117			Ctsb	3.97777e-15	0.488535
	Rgs16	8.64034e-05	0.49472			LOC100360117	1.4666e-06	0.537825			App	4.16314e-15	0.504508
	Ubash3b	8.66673e-05	0.377314			Gadd45b	1.48003e-06	0.842714			AC128848.1	4.26935e-15	0.689452
	Trhde	8.69089e-05	-0.356062			Ndufa4	1.48576e-06	0.430323			Rab5c	4.67111e-15	0.535556
	Adgra2	8.72573e-05	-0.550886			Gtf2h2	1.52738e-06	-0.349489			Gabarapl2	4.79714e-15	0.462556
	Cyr61	9.04236e-05	0.615894			Ppp1r14b	1.62525e-06	0.501927			AC134224.1	4.93034e-15	-0.629806
	RT1-CE10	9.28984e-05	0.392652			Birc6	1.6681e-06	-0.436284			Spon1	5.21916e-15	-0.563887
	Dner	9.44153e-05	-0.449981			Uqcrh	1.72266e-06	0.486447			Glo1	6.43152e-15	0.534836
	Penk	9.48237e-05	-0.313912			Ush1c	1.73069e-06	-0.417285			Vat1	6.59745e-15	0.439012
	Abhd8	9.52153e-05	-0.525084			Spg21	1.74303e-06	0.480238			Adamtsl4	6.69553e-15	0.414252
	Olfm2	9.59638e-05	0.412711			Atp5f1e	1.75688e-06	0.512839			Ppp1r14b	7.12952e-15	0.440047
	Gpx4	9.77706e-05	0.317966			Syce3	1.77251e-06	-0.459055			Mrfap1	7.72779e-15	0.447375
	Ptprf	9.93158e-05	0.321964			Mt-atp6	1.77327e-06	0.644019			Cltb	8.06771e-15	0.482634
	Gemin2	0.000100985	-0.401462			LOC100363469	1.8172e-06	0.606569			Tox2	8.13031e-15	-0.667681
	Nrxn3	0.000106144	-0.309839			Meis1	1.83853e-06	-0.472277			Tubb2a	9.55118e-15	0.596569
	Tex2	0.000109269	0.410947			Col9a3	1.88183e-06	-0.437122			Oaf	1.08954e-14	-0.64276
	Prex1	0.000112593	0.339202			Kmt2e	1.9439e-06	-0.378349			Frmd4b	1.29582e-14	-0.737194
	AABR07017145.1	0.000114335	-0.467439			Gli3	2.00942e-06	-0.419256			Jpt1	1.6258e-14	0.542013
	Tmbim1	0.000114885	0.314223			Dbi	2.01887e-06	0.331092			Pik3r1	1.81961e-14	0.465417
	Arhgef12	0.000118523	0.313044			Tnrc6b	2.21013e-06	-0.378841			AABR07021871.1	1.93796e-14	0.475026
	Atp6v0b	0.000121409	-0.361559			Mchr1	2.23603e-06	0.511317			Cldn9	2.02467e-14	0.540176
	Atp1b3	0.000125033	0.346281			Adamts18	2.24017e-06	-0.576623			Smim14	2.1556e-14	0.496299
	Crb1	0.00012597	-0.298399			Vamp1	2.26317e-06	-0.388171			Klf4	2.34882e-14	0.700373
	AC141489.1	0.000129633	0.411991			Gltp	2.32678e-06	0.525111			Ptbp2	2.72066e-14	-0.665292
	Pld2	0.000129848	-0.451434			Egfl6	2.34609e-06	-0.480231			LOC108348287	3.14358e-14	0.366771
	Zfyve21	0.00013397	-0.416207			Rpl19	2.44581e-06	0.560305			Lmna	3.44072e-14	0.463458
	Mif4gd	0.000136295	-0.468367			Gphn	2.54027e-06	-0.40811			F3	3.99273e-14	-0.768117
	Galnt18	0.000137473	0.346171			Cdk10	2.57341e-06	-0.42092			Cav1	4.34616e-14	-0.493865
	Clec2g	0.000139171	0.478377			Sorbs3	2.58126e-06	-0.528434			Cebpg	4.38175e-14	0.395191
	AABR07001061.1	0.000142803	-0.553684			Ostm1	2.68899e-06	0.487359			Kctd1	4.44533e-14	0.42903
	Tcf7l2	0.000145826	0.436789			Nfyc	2.77576e-06	-0.441063			Slc22a15	4.50075e-14	0.457977
	RGD1562378.2	0.000147674	-0.493084			Zeb2	2.79887e-06	-0.382698			Fndc5	4.78112e-14	0.490888
	S100a6	0.000147929	0.252351			Gpld1	2.87562e-06	-0.408755			Tspo	5.57124e-14	0.426566
	Rab3b	0.00015026	0.40741			Fads2	2.989e-06	-0.264025			Plin2	5.99724e-14	0.616855
	LOC108348287	0.000150794	0.289576			H3f3c	3.03667e-06	0.283715			LOC100360841	6.05715e-14	0.479303
	Pum1	0.000152769	0.354257			Arhgap32	3.23345e-06	-0.458267			Epb41l2	6.27876e-14	-0.787684
	Nr2e1	0.000153095	-0.522678			Grin2c	3.4352e-06	-0.381242			Aph1a	6.43833e-14	0.351385
	Cd99	0.000154828	0.305061			Mt-nd6	3.54895e-06	0.599777			Rpl27	6.7883e-14	0.386395
	Prnp	0.00015515	0.300649			Tmed10	3.60855e-06	0.59696			Cops9	6.85521e-14	0.44236
	Tmem256	0.000160037	0.284088			NEWGENE-1582771	3.74457e-06	-0.351622			Cdc42ep5	6.88146e-14	0.421699
	Abcb9	0.00016296	-0.400344			Map2k6	3.80292e-06	-0.40746			Uqcr10	6.95328e-14	0.480444
	Cdk6	0.000162982	0.425923			Slc6a11	3.84553e-06	-0.455221			Arntl2	7.0369e-14	0.362084
	Xrcc5	0.000170818	0.392033			Pdyn	3.91238e-06	0.339865			Trib1	7.57541e-14	0.541845
	Tox3	0.000171623	-0.365378			Gpx1	3.9694e-06	0.491617			Cald1	7.68974e-14	0.439434
	Shisa6	0.000175187	0.459271			Park7	4.10788e-06	0.395427			Rps13	7.97347e-14	0.521974
	Tm4sf1	0.00018011	-0.452756			Rps27a	4.11211e-06	0.538422			Prnp	8.36758e-14	0.437044
	LOC100360413	0.000180285	0.270287			Ctsz	4.27061e-06	0.364942			Stc1	8.41955e-14	0.551546
	Tmem59l	0.000181073	0.33048			RGD1307100	4.46949e-06	-0.399861			C1r	8.56581e-14	0.39001
	Pdgfc	0.000181233	-0.41212			Rfx3	4.52227e-06	-0.438582			Reep5	9.25291e-14	0.471513
	Cd44	0.000187408	0.404147			Cdh2	4.52868e-06	-0.294195			RT1-S3	1.04446e-13	0.401014
	Cib1	0.000189695	0.326378			Camkmt	4.68042e-06	-0.389992			Vdac1	1.05341e-13	0.511053
	Mcrs1	0.000191769	-0.402447			Atox1	4.7655e-06	0.479874			Agt	1.07156e-13	-0.989093
	Lrrc17	0.000192243	-0.380222			Mt-nd4l	4.93194e-06	0.499231			Anxa2	1.20452e-13	0.383981
	Epha5	0.000195644	0.304033			Ssbp2	5.08668e-06	-0.508655			Gpnmb	1.21813e-13	0.398591
	Cdkn1b	0.000195853	0.450107			Fam172a	5.18886e-06	-0.414195			Bloc1s1	1.2397e-13	0.432355
	Eml6	0.000198645	-0.377072			St5	5.25235e-06	-0.445947			Epas1	1.27798e-13	0.471875
	Etnppl	0.000201961	0.434592			Rpl32.1	5.34404e-06	0.541209			Ssbp4	1.37404e-13	0.4662
	Rpl27a	0.000204647	0.454789			Adgra2	5.61998e-06	-0.445046			Tceal9	1.65372e-13	0.406537
	Ssc5d	0.000204999	0.316606			Sh3tc2	5.7768e-06	-0.40313			Ngb	1.65406e-13	0.412336
	Csf1	0.000207206	0.3096			Pacs1	5.87949e-06	-0.368524			Gadd45a	1.65687e-13	0.597134
	Zfp277	0.000221139	0.384947			AABR07026997.1	5.88124e-06	0.459083			Sirpa	1.73114e-13	0.439527
	Cd320	0.000221753	-0.42722			Acsl6	6.07819e-06	-0.349696			Ptprn	1.90183e-13	0.399026
	Pnisr	0.000223009	-0.319356			Hspa2	6.29126e-06	0.488837			H3f3c	2.00695e-13	0.357532
	Car6	0.000224579	-0.398008			Zmat1	6.34225e-06	-0.328521			Mtch1	2.12728e-13	0.493015
	Nfib	0.000225071	0.303862			Usp33	6.35801e-06	-0.399488			Cox4i1	2.22733e-13	0.441642
	Lap3	0.000225367	0.315566			Capn13	6.62874e-06	-0.413268			Rpl35	2.32615e-13	0.484557
	Usp11	0.000225639	-0.38444			Basp1	6.71766e-06	0.430947			Rnf7	2.36042e-13	0.485213
	Ccnd3	0.000233093	-0.454982			AC141489.1	6.82291e-06	0.581442			Rlbp1	2.60294e-13	-0.330377
	Vgll4	0.00023365	-0.392526			S100b	7.27898e-06	0.581732			Ecel1	2.751e-13	0.41942
	Pxmp2	0.000238121	-0.335436			Pknox2	7.32423e-06	-0.486482			Cmtm7	2.9635e-13	0.286152
	Slc25a38	0.00024439	-0.293079			Srgap3	7.59281e-06	-0.40171			Mxra7	3.20073e-13	0.37677
	Plekhb2	0.000248305	0.27201			Cox6c	7.73378e-06	0.496545			Spidr	3.42664e-13	0.57639
	Lmna	0.000249768	0.399853			Coq10b	7.81945e-06	0.642955			Sec11c	3.63738e-13	0.360789
	Opcml	0.000257375	0.45569			Mt-nd5	8.06307e-06	0.467177			LOC689574	3.9364e-13	0.468539
	Acss3	0.000259634	0.330542			Picalm	8.15525e-06	-0.405777			LOC100360491	4.07828e-13	0.420491
	Etl4	0.000266597	0.569782			Tet2	8.32283e-06	-0.455033			AC135409.1	4.23337e-13	0.414747
	Snn	0.000269462	0.340475			LOC100361934	8.42859e-06	0.467606			Mdk	4.42192e-13	0.406089
	Tpp2	0.00027321	-0.445611			Atp6v0e1	8.45361e-06	0.386674			Polr1d	4.53212e-13	0.484531
	Syce3	0.00027838	-0.368863			Clec2g	8.59472e-06	0.573229			Etv5	4.58353e-13	0.447477
	Fam227b	0.000282223	-0.358756			Zfp467	8.61956e-06	-0.415953			Ctxn3	4.77746e-13	0.509206
	Prxl2a	0.000286893	-0.370294			Ate1	8.88543e-06	-0.366022			Msn	5.35654e-13	0.467437
	Rpl37	0.000287504	0.301409			Gatd3a	8.95605e-06	0.519688			Dynlrb1	5.47396e-13	0.430474
	Unc5b	0.000288711	0.257628			Tent2	9.0106e-06	-0.369117			Atp6v0e1	5.54559e-13	0.429643
	Cald1	0.000290573	0.36701			Npm1	9.14038e-06	0.439707			Rpl18	5.66386e-13	0.447629
	Ptprd	0.000291248	-0.29063			Zmym4	9.19763e-06	-0.350602			AABR07017046.1	5.72447e-13	0.328847
	Scp2	0.000294759	-0.351972			Pik3c2a	9.24199e-06	-0.373034			Bpgm	6.75519e-13	0.415055
	Wscd1	0.000297569	-0.414862			Sbno2	9.61324e-06	0.455763			Hopx	8.86398e-13	0.506733
	RT1-T24-4	0.00029802	-0.464748			RGD1562402	9.67712e-06	0.552663			Flot2	9.22635e-13	0.40606
	LOC100361645	0.000300303	-0.352375			Slco1c1	9.7986e-06	-0.406046			Rps8	9.64679e-13	0.466943
	Scrg1	0.000304128	0.260184			AC128960.1	9.99501e-06	0.4729			S100a6	9.83826e-13	0.501808
	Atp2b1	0.000304179	0.33127			Slc16a1	1.0389e-05	-0.454866			Dennd2a	1.10432e-12	0.376821
	Scg5	0.000305825	-0.388495			Tra2a	1.05559e-05	-0.347846			Ndufa12	1.15495e-12	0.471675
	Rcan2	0.000308025	0.355927			Mzt2b	1.05947e-05	0.368205			Sec61b	1.20693e-12	0.459035
	Gap43	0.000308715	0.310448			Naca	1.07829e-05	0.390185			Mapk3	1.2369e-12	0.462232
	Thrsp	0.000309867	-0.414815			Gtf3c2	1.10848e-05	-0.298333			Snx5	1.25365e-12	0.433989
	Scn1a	0.000312377	0.422819			Arhgef33	1.13184e-05	-0.418077			Prss23	1.29661e-12	0.461778
	Necab3	0.000313018	0.280068			Ptprk	1.14689e-05	-0.363154			Dstn	1.33588e-12	0.443386
	Mdk	0.000317621	-0.358331			Mxra7	1.15399e-05	0.288437			Rps24	1.62202e-12	0.450003
	Adgrl3	0.000318684	0.265121			Tbc1d19	1.1547e-05	-0.451758			LOC301124	1.74207e-12	0.467977
	Prelid3a	0.00032418	0.293193			Pfkp	1.15946e-05	-0.368494			Gas6	1.93696e-12	0.360686
	Dusp16	0.000329282	0.427661			Rps9l1	1.18155e-05	0.485181			Gadd45g	2.12443e-12	0.632061
	Ccdc138	0.000330067	-0.408819			Mt-co3	1.21479e-05	0.861048			Selenok	2.15507e-12	0.40352
	Vat1	0.000330601	0.271276			Slc26a2	1.2665e-05	0.343945			Spg21	2.41222e-12	0.427227
	Arrdc2	0.000337121	-0.526087			Olfm1	1.29781e-05	-0.379157			Atp5f1d	2.48032e-12	0.418956
	Nedd4l	0.000337293	0.250494			Efemp1	1.39153e-05	-0.281692			Ptp4a2	2.9268e-12	0.430546
	Mt-nd4	0.000346857	0.390685			Crim1	1.4266e-05	-0.436444			Tprg1l	3.06987e-12	0.434962
	Nnat	0.000349567	0.278259			Abcc5	1.43319e-05	-0.341498			Npm1	3.31214e-12	0.424983
	Camkmt	0.000350942	-0.431016			Nfat5	1.47912e-05	-0.407086			Srp14	3.43264e-12	0.445861
	Camta1	0.000357123	-0.348611			Ptpn4	1.489e-05	-0.40887			Mt-nd3	3.70489e-12	0.414073
	Apc2	0.00036295	-0.453636			Peg3	1.50285e-05	-0.31321			C1qbp	3.98851e-12	0.386193
	LOC100360573	0.000382727	0.424315			Cntn1	1.54546e-05	-0.415617			Capzb	4.19465e-12	0.428733
	Pgm1	0.000384469	-0.360136			Sema5a	1.55326e-05	-0.376647			Scara3	4.40524e-12	0.466349
	Cln6	0.000393577	-0.356002			Ywhaq	1.56856e-05	0.425489			Cav2	5.16492e-12	0.444473
	Chd7	0.000393852	0.265995			Dis3l2	1.61642e-05	-0.44635			Eif4g2	5.3204e-12	0.392429
	LOC100362339	0.000394485	0.286688			Igfbp7	1.62221e-05	0.341694			Adamts1	5.3337e-12	0.528418
	Smpd1	0.000432101	-0.370006			Tox3	1.6574e-05	-0.336311			Sirt2	5.3789e-12	0.350306
	Bcl2	0.000446847	0.282331			Tbc1d5	1.69673e-05	-0.460572			Mlc1	5.42734e-12	0.392137
	Sdc2	0.000451724	0.303285			Map3k5	1.69893e-05	-0.515245			Ntan1	5.48732e-12	0.43145
	Srsf12	0.000451845	0.25595			Gulp1	1.70548e-05	-0.380127			Cd9	5.72437e-12	0.260873
	C1s	0.000453078	0.324732			Unc80	1.72152e-05	-0.34097			Scn1b	6.45874e-12	0.291511
	Pde4d	0.000462016	0.274678			Dcps	1.7526e-05	-0.325905			Snrpd2	6.60082e-12	0.446227
	Inpp5f	0.000465533	0.267752			Plcb4	1.81456e-05	-0.33766			Clec2g	6.79627e-12	0.442929
	Cdc14b	0.000477717	0.281597			Sh3rf3	1.83394e-05	-0.44848			Lmbrd1	7.00383e-12	0.364742
	Cct3	0.000486636	-0.378664			Ankh	1.87771e-05	-0.35058			Fkbp1a	7.17675e-12	0.384575
	Dhx29	0.000496997	-0.298386			Smo	1.88138e-05	-0.378497			Galk1	7.32465e-12	0.292653
	Ptar1	0.000508944	0.339268			Sat1	1.9472e-05	0.368093			AC132539.1	7.56296e-12	0.340135
	Rarres2	0.000525907	-0.305181			Notch1	1.95526e-05	-0.326084			Mt-atp8	7.6983e-12	0.421799
	Unc13d	0.000544272	-0.336586			Atp5pd	1.96272e-05	0.435152			Ddx5	7.78309e-12	-0.423002
	Ywhaz	0.000548292	-0.542232			Clta	1.98772e-05	0.427127			Tnfrsf1a	7.90562e-12	0.305196
	Slc1a4	0.000559698	0.303641			Selenok	2.04087e-05	0.454355			Ran	8.30985e-12	0.427505
	Dpysl4	0.000582139	0.261669			Gabarapl2	2.07929e-05	0.357157			AABR07072539.1	8.59345e-12	0.372476
	Cfl1	0.000583183	0.357971			Aqr	2.08715e-05	-0.344383			Vps39	8.85499e-12	0.417987
	Nkain4	0.000634137	0.263726			Abi3bp	2.15362e-05	-0.287522			Plcd3	9.48394e-12	0.278915
	Shc3	0.000639309	0.260407			RGD1305645	2.15546e-05	0.384061			AABR07026058.1	9.93566e-12	0.329887
	Ddit4	0.000645137	-0.729593			Gabbr2	2.16701e-05	-0.408302			Rps23	1.05579e-11	0.346918
	Fam92a	0.000651308	0.267051			Tmem98	2.22206e-05	0.453951			Mea1	1.08433e-11	0.386858
	RGD1562402	0.000656719	0.403964			Ctsc	2.25156e-05	0.473769			Abca8a	1.09238e-11	-0.46443
	Inpp4a	0.000665746	0.324211			Tnfrsf12a	2.35044e-05	0.507553			Gtf2h5	1.16492e-11	0.42394
	Fos	0.000669739	0.305284			Rnf19b	2.42362e-05	0.408469			Rnf187	1.2263e-11	0.443607
	Tmed10	0.000676071	0.5063			Polr2e	2.42863e-05	0.444379			Ybx1-ps3	1.31728e-11	0.444022
	Cemip2	0.000696388	0.293936			Cyp26a1	2.49234e-05	0.619118			Rac1	1.41735e-11	0.410222
	LOC100360218	0.000703259	0.26425			Bex2	2.53686e-05	0.510034			AABR07001902.1	1.45245e-11	0.388152
	Rpl23	0.000716621	0.45919			Zdhhc2	2.54719e-05	-0.340644			LOC100360218	1.59978e-11	0.321801
	Col16a1	0.000740812	0.297471			Ckap5	2.56015e-05	-0.445092			Slc6a11	1.68023e-11	-0.739882
	Amacr	0.000768564	0.286009			Dnajc1	2.56139e-05	-0.349237			Fosl1	1.87166e-11	0.701604
	Tnpo1	0.000774608	0.338949			Rpl35	2.56833e-05	0.477533			Snapc2	1.94798e-11	0.354402
	Aars	0.000782472	0.309933			Scaf8	2.59085e-05	-0.312941			Alk	2.14706e-11	0.333925
	Socs5	0.000816472	0.396955			LOC100360522	2.59452e-05	0.472671			Myc	2.21183e-11	0.345943
	Chmp1a	0.000817497	-0.392654			Dld	2.62759e-05	-0.307261			Hacd2	2.32426e-11	-0.521972
	Lgmn	0.000823866	0.333826			Agt	2.69401e-05	-0.398057			Cyp27a1	2.50088e-11	0.340688
	AABR07040864.1	0.000830423	0.821208			2024-09-04	2.7126e-05	0.399851			Ndn	2.5458e-11	0.335851
	Ogfrl1	0.000832806	0.328028			Klf6	2.72945e-05	0.73173			Ngrn	2.75862e-11	0.424364
	Nav2	0.000837604	0.350391			Rpsa	2.73631e-05	0.454649			Lamtor5	2.78765e-11	0.341891
	Dhrsx	0.000842206	-0.313885			Prpf4b	2.82986e-05	-0.430923			Hsbp1	2.84725e-11	0.391463
	Pcsk1	0.000883217	0.499205			LOC297568	2.86409e-05	0.433693			AABR07000398.1	2.91729e-11	-0.535561
	Cldn9	0.000886032	0.471808			Mt-atp8	2.8663e-05	0.369006			Phpt1	2.94832e-11	0.463115
	Cab39	0.000893858	-0.329927			Timm13	2.95699e-05	0.462467			Minar2	2.99638e-11	0.445136
	Dst	0.000909113	0.350977			Lrrc49	2.98236e-05	-0.379399			Id4	3.18404e-11	-1.12991
	RGD1306746	0.000911719	-0.317093			Atp5mc2	3.00005e-05	0.38803			Enho	3.38176e-11	0.410417
	Usp47	0.000918444	0.298343			Atad2b	3.0211e-05	-0.399176			AABR07053687.1	3.66208e-11	0.350104
	Hspa5	0.000932306	-0.290161			Shisa4	3.05058e-05	-0.351762			LOC100362987	4.06168e-11	0.359959
	Ppp1cc	0.000933313	0.283511			Smim14	3.07802e-05	0.529053			Scp2	4.09771e-11	0.355229
	Slc25a21	0.000936342	-0.374154			Abhd14b	3.08118e-05	0.382964			Pnkd	4.20111e-11	0.417704
	Puf60	0.000942514	-0.337975			Rftn1	3.0922e-05	-0.398797			Gnl1	4.72078e-11	0.359575
	AC107174.2	0.000961558	0.314208			Smim29	3.14592e-05	0.395079			Gulp1	5.09774e-11	-0.587294
	Wdr1	0.000978404	0.418856			Elob	3.23368e-05	0.420265			Arl6ip5	5.10643e-11	0.338582
	Vat1l	0.00099523	0.376207			Ier3	3.29258e-05	0.843122			Rpl24	6.09307e-11	0.384612
	Capn13	0.0010117	-0.342471			Celf2	3.29359e-05	-0.355192			Ezr	6.63523e-11	0.340355
	Robo1	0.00101585	0.501019			Tnfrsf21	3.31753e-05	-0.32149			S100a1	6.78842e-11	0.318008
	Pcdh9	0.0010511	0.268221			Epb41l2	3.40612e-05	-0.365031			Rpl36al	7.91952e-11	0.444803
	Eml5	0.00105382	0.423038			Ccnd1	3.4236e-05	0.423499			Lasp1	8.29078e-11	0.274739
	Fjx1	0.00106695	0.25714			Cers6	3.43632e-05	-0.419945			Rps15	8.75512e-11	0.375185
	Uxs1	0.00107959	0.282098			Tanc2	3.49947e-05	-0.481928			Abhd17a	8.93159e-11	0.314711
	Clip4	0.00111165	0.318543			Megf9	3.53029e-05	-0.427596			Emp3	8.95032e-11	0.29907
	Spry1	0.00111481	0.291405			Frem1	3.54379e-05	-0.463351			Tmem98	9.02881e-11	0.399585
	Ivd	0.00114239	-0.324087			Cyba	3.69248e-05	0.462471			Tf	9.11964e-11	0.661155
	LOC100360522	0.00114449	0.3443			Ddit3	3.6979e-05	0.607279			Atf3	9.1816e-11	0.474211
	Dock9	0.00116865	0.33707			Gpatch8	3.79102e-05	-0.375301			Rhoa	9.24521e-11	0.323334
	Tnfaip6	0.0011963	0.362812			Mrps33	3.80453e-05	0.473692			Ybx3	9.42026e-11	0.437258
	Ppfia1	0.00125231	0.341201			Arglu1	3.9436e-05	-0.27256			Gstm1	9.9255e-11	0.407543
	Eif2s2	0.0012616	0.354019			Ccdc80	4.01552e-05	-0.258102			Mchr1	9.97055e-11	0.454353
	Ybx3	0.00126312	0.31447			Uvrag	4.08661e-05	-0.304141			Cmc1	1.15008e-10	0.314177
	Kcnk12	0.00126423	0.266421			Polr1d	4.13152e-05	0.466063			Slc3a2	1.15539e-10	0.339851
	Pde5a	0.00127019	0.250017			LOC100360413	4.15251e-05	0.413903			Ier5l	1.19047e-10	0.331765
	Clrn1	0.00127454	0.284336			Kmt5b	4.17673e-05	-0.377542			Mgarp	1.27361e-10	-0.323241
	Cap2	0.00128419	0.279558			Arid1b	4.25422e-05	-0.42212			Abhd14b	1.34121e-10	0.372374
	Aldoa	0.00129687	-0.351691			AABR07071891.2	4.27721e-05	0.459833			Ost4	1.44489e-10	0.387825
	Sned1	0.00130244	-0.327516			Fas	4.45695e-05	0.339949			Postn	1.53141e-10	0.516595
	Bdh2	0.0013063	0.311922			Tmem41a	4.57904e-05	0.404031			Rps27	1.54304e-10	0.379501
	Snrpe	0.00132858	0.310624			Mgat5	4.60501e-05	-0.342005			Rpl34	1.68485e-10	0.362953
	Cpne5	0.0013414	-0.349794			Cox15	4.63438e-05	-0.345556			Ctsc	1.72211e-10	0.388767
	Stmn1	0.00136449	-0.386168			Rims2	4.71312e-05	-0.389401			Cntf	1.75797e-10	0.397786
	Lrp5	0.00139352	0.303905			Col9a1	4.7388e-05	-0.284333			Adi1	1.84841e-10	0.433119
	Gadd45g	0.0013974	0.527693			Cnp	4.78925e-05	0.466518			Pgf	1.88806e-10	0.280338
	Uqcrb	0.00140031	0.26174			Nf1	4.81488e-05	-0.398534			Jak1	1.95163e-10	0.384794
	Hs2st1	0.00140974	0.377646			Gadd45g	4.8908e-05	0.715338			Rap1a	1.97149e-10	0.424673
	Rps23	0.00143158	0.438113			Bri3	5.30246e-05	0.407484			Rnf181	1.98686e-10	0.324165
	Mamdc2	0.00146434	0.315848			Pkn2	5.36444e-05	-0.317705			Car2	1.99212e-10	-0.376514
	Prr13	0.0015086	0.286658			LOC108349548	5.36807e-05	0.472567			Gabarap	2.00581e-10	0.414421
	Gnai1	0.00150896	0.252655			Sat2	5.40218e-05	0.503026			Ndrg2	2.01262e-10	0.339048
	Frmd8	0.00152289	0.359908			Selenof	5.41561e-05	0.27094			Thap12	2.12456e-10	0.298894
	Nme3	0.00158209	-0.414507			Cpsf3	5.62214e-05	-0.277087			Col2a1	2.23338e-10	-0.77057
	Caskin1	0.00161532	-0.368872			Acadsb	5.66937e-05	-0.317334			Abhd17c	2.30591e-10	0.352077
	Pex2	0.00162266	-0.335028			Rmdn1	5.72669e-05	-0.366462			Mlf2	2.3972e-10	0.42479
	Dock1	0.00166011	0.298694			Adamts1	5.75276e-05	0.601289			B4galt6	2.4381e-10	0.308528
	Slc7a3	0.0016659	-0.428128			Ntn4	5.76312e-05	-0.576367			Rbm5	2.44377e-10	-0.540994
	Ska2	0.00166902	-0.314681			Aqp4	5.78418e-05	-0.271496			Sntb1	2.55734e-10	-0.67143
	Gcsh	0.00167356	-0.316436			Lrba	6.12056e-05	-0.439989			Bri3	2.68475e-10	0.372987
	AABR07004130.1	0.00169536	0.275368			Cavin3	6.18968e-05	0.359732			Rorb	2.81232e-10	-0.539568
	LOC100360491	0.00171533	0.346854			Gap43	6.19061e-05	0.311769			Ssc5d	2.83607e-10	0.31599
	Slc25a3	0.00174924	-0.277777			Gla	6.23752e-05	0.490552			Gria1	2.85169e-10	0.396546
	Rps18l1	0.00177395	0.456327			LOC100909712	6.24327e-05	0.707356			AABR07031089.1	2.87376e-10	0.279073
	Prr5l	0.00178425	0.283097			Uqcr11	6.24761e-05	0.455269			Bag3	2.89109e-10	0.412049
	Cfap36	0.00178567	-0.33008			Myo9a	6.3181e-05	-0.361395			Bcl3	2.91862e-10	0.279591
	Sesn3	0.00179765	-0.306152			Qsox1	6.54112e-05	0.47076			Slc7a5	3.22915e-10	0.339242
	Exoc6	0.00180241	0.50289			Glo1	6.66576e-05	0.453656			Lgmn	3.34698e-10	0.402832
	Rnf25	0.00182466	-0.354614			Prpf3	6.68192e-05	-0.333343			Chdh	3.36729e-10	0.277754
	Odf3b	0.00183787	-0.297747			AC094217.1	6.71687e-05	0.43721			Ppp1r3c	3.43296e-10	0.540654
	Rps8	0.00184915	0.321959			Anapc1	6.97251e-05	-0.3555			Rnd3	3.70991e-10	0.343877
	Tubb5	0.00188835	0.27752			Cgrrf1	7.05213e-05	-0.311444			Lgi3	3.87842e-10	0.255602
	Gbe1	0.00189283	-0.298289			Abl2	7.10007e-05	-0.36445			Gbp2	3.92377e-10	0.284514
	Zfand6	0.00192374	0.284886			Mapre1	7.21315e-05	0.425238			Sema3e	4.02366e-10	-0.539334
	Pdcl3	0.00195675	0.270047			Dido1	7.30282e-05	-0.308334			C1galt1	4.02379e-10	0.25034
	Rasal2	0.00196605	0.379385			Rcn2	7.33351e-05	-0.417053			Sned1	4.09395e-10	-0.552309
	AC118957.2	0.0020036	-0.341261			AABR07019341.1	7.37395e-05	0.430393			Lrba	4.25248e-10	-0.65215
	Agrn	0.00201337	-0.315795			Sik3	7.478e-05	-0.341548			Sdhd	4.28824e-10	0.352486
	Mcfd2	0.00202945	0.262006			Akr7a2	7.49316e-05	0.350343			Rpl18a	4.35997e-10	0.365341
	Mfap2	0.00204905	-0.345344			Rpl17	7.50255e-05	-0.361325			Ldhb	4.37878e-10	0.364234
	Ets2	0.0020623	0.399055			Rps6ka5	7.53344e-05	-0.287366			Arid5a	4.41973e-10	0.619523
	Pigp	0.00207514	-0.318678			Xpr1	7.59107e-05	-0.390159			Fam13b	4.66922e-10	-0.578164
	Phactr2	0.00208034	0.382577			Col4a3	7.80475e-05	-0.606222			AABR07057683.1	4.67431e-10	0.372824
	Mettl23	0.00209299	-0.253555			Myl12a	7.84808e-05	0.446947			Iscu	4.67437e-10	0.359741
	Tymp	0.00214046	-0.359616			Ylpm1	7.86823e-05	-0.370703			Plekhm3	4.6982e-10	-0.607546
	Maff	0.00214463	0.355031			Klf12	7.87552e-05	-0.410314			Jund	4.71379e-10	-0.593004
	Ndrg2	0.00217197	-0.30974			Sdk2	8.1708e-05	-0.432126			Pold4	4.7226e-10	0.373013
	Crybb1	0.00217285	-0.275171			Rb1	8.32319e-05	-0.332299			Vamp1	4.87029e-10	-0.685183
	Prkd1	0.00218564	0.30626			Htra1	8.44664e-05	0.27336			Add3	4.93357e-10	-0.476714
	Prkch	0.00224043	-0.384822			Acot11	8.67151e-05	-0.33532			Hsd17b4	4.9709e-10	0.326967
	St3gal4	0.00229562	0.270361			Phlda3	8.69517e-05	0.28432			Vipr2	5.0553e-10	-0.673244
	Pim3	0.00233255	-0.343481			Micu2	8.73108e-05	-0.34041			Ei24	5.05849e-10	0.3062
	Desi1	0.00236277	-0.290081			Erc2	8.83727e-05	-0.366419			Ppa1	5.08634e-10	0.369803
	Shank2	0.00237747	0.267581			App	9.09373e-05	0.420994			Gsta6	5.13223e-10	0.360071
	Tcf25	0.00239475	0.272649			Tmprss5	9.22153e-05	-0.342272			Srsf5	5.34576e-10	-0.616959
	Dlgap4	0.0024274	0.257828			Itgav	9.31605e-05	-0.418869			Trappc6a	5.48365e-10	0.336719
	Fzd9	0.00244863	-0.300033			Tmem134	9.49902e-05	0.422067			Cxcl14	5.72732e-10	0.279272
	Pik3r1	0.00246939	0.345353			Kcnj10	9.6177e-05	-0.319934			LOC288913	5.83505e-10	0.364277
	Gldc	0.00249084	0.267467			Mib1	9.64882e-05	-0.367065			Anp32b	5.93049e-10	0.366478
	Ly75	0.00252076	0.348427			Mob3b	0.000100094	-0.428692			Tra2a	6.15649e-10	-0.655068
	Fxr1	0.00253277	-0.364651			Prss23	0.000100405	0.344991			Abhd4	6.19695e-10	0.401943
	Ifi27	0.00254431	0.558961			Phpt1	0.00010049	0.426099			Etv4	6.32379e-10	0.261258
	Mitf	0.0025465	0.292173			Cadm1	0.000101713	-0.344799			Rwdd4	6.39139e-10	0.278721
	Flot2	0.00255009	0.303834			Mt-nd1	0.000102006	0.568579			Lage3	6.58984e-10	0.430665
	Mief1	0.00257251	-0.319187			Mtmr7	0.000104684	-0.299254			Cmtm8	7.60406e-10	0.258053
	Mta3	0.00258704	0.254245			Zfp449	0.000104788	-0.381616			Dhrsx	7.73161e-10	-0.659999
	2024-09-04	0.00258866	0.310616			Cox6b1	0.000106881	0.424676			AABR07040864.1	7.82658e-10	-1.16776
	Parp14	0.00260569	0.250666			Map1lc3a	0.000111906	0.374136			Tceal8	7.93887e-10	0.410542
	Rbpj	0.00265221	0.255583			Slc25a5	0.000112255	0.488587			Cdc37	8.20606e-10	0.286655
	AABR07034438.1	0.00267151	-0.381554			Fxr2	0.000115556	-0.337856			Aldoc	8.5683e-10	0.281664
	Pfkl	0.00267324	-0.344653			Rnf7	0.000115563	0.387094			Oca2	8.62613e-10	0.493644
	Col9a2	0.00268689	-0.342518			Atp6v1f	0.000115616	0.39549			Ccni	8.70033e-10	0.281651
	Mmel1	0.00269359	-0.394202			Xrn2	0.000115843	-0.35822			Elmsan1	9.11417e-10	0.43221
	Adamts1	0.00271123	0.383276			Hip1	0.000119059	-0.321679			Aldh2	9.19462e-10	0.278864
	Psmc2	0.00275669	-0.350642			Me3	0.000119528	-0.316819			Mid1ip1	9.19705e-10	0.333405
	Rftn1	0.00276416	-0.390475			Ddt	0.00012093	0.417291			Ube2l6	9.31832e-10	0.283451
	Mt-co2	0.00277544	0.529439			Epc1	0.000123226	-0.332336			Junb	9.33982e-10	0.372913
	Fkbp4	0.00277892	-0.381312			Sbf2	0.00012412	-0.34283			Rps28	9.52153e-10	0.410597
	Mapk3	0.00279274	0.258759			Ppp2r3a	0.000126606	-0.333637			Smim29	1.07872e-09	0.347294
	Cacybp	0.00281449	-0.375613			Filip1	0.000127311	-0.291862			Gstp1	1.07874e-09	0.436685
	Cct6a	0.00283112	-0.314101			Ptprn	0.000129012	0.403639			Atp5mc3	1.10099e-09	0.360616
	Zwint	0.00285232	-0.398829			Dhx15	0.000135213	-0.325568			Slc25a3	1.13152e-09	0.374291
	Mchr1	0.00285724	0.336872			Nbeal1	0.000135374	-0.352622			Dbi	1.13357e-09	0.30738
	Agpat4	0.00287338	0.271927			AABR07033564.1	0.000142468	-0.2582			Ptms	1.17231e-09	0.342348
	Ier3	0.0028803	0.665914			Sub1	0.000143593	0.350456			Eef1b2	1.17254e-09	0.340329
	Akap17a	0.00288798	-0.34277			Tspan5	0.000146258	-0.335395			Shisa6	1.21883e-09	0.342953
	LOC498555	0.00293624	0.284367			LOC100365839	0.000146488	0.43775			Lamtor1	1.22365e-09	0.348775
	Pde8b	0.00294291	0.263941			Pcdhgc3	0.000146723	-0.325415			Cript	1.23775e-09	0.321476
	Dock7	0.00298391	0.25839			Sptlc1	0.000146815	-0.270385			Wdr1	1.35727e-09	0.418147
	Rps27l	0.00300544	0.299155			Peak1	0.000149656	-0.323429			Phyhd1	1.37973e-09	0.338669
	Plec	0.00301829	0.281787			Far1	0.000151564	-0.292451			Timm8b	1.46294e-09	0.399881
	Fxyd3	0.00302542	-0.369359			Cd99	0.000151712	0.279553			Rpl37a	1.47967e-09	0.319288
	Icam1	0.00303563	0.349057			Ppm1e	0.000153213	-0.318372			Mettl9	1.49398e-09	0.372119
	AABR07026125.1	0.00305579	-0.301042			Snw1	0.000153455	-0.298974			AABR07072078.1	1.49898e-09	0.291788
	AABR07019341.1	0.00305931	0.304899			Rps28	0.000153666	0.433753			Rps3a	1.51804e-09	0.290957
	Rubcn	0.00308119	0.268477			Pin1	0.000154095	0.456153			Nek6	1.57737e-09	0.262719
	Tma7	0.00314126	0.278104			Fzd1	0.000156408	0.310729			Id1	1.57991e-09	-1.24174
	Acap2	0.00316276	0.338381			Rps29	0.000159498	0.534045			LOC100363268	1.58655e-09	0.33629
	Fancl	0.00318706	-0.344463			Tst	0.000161146	0.435483			Fhod3	1.59154e-09	-0.772396
	Mgst1	0.00322813	0.340597			Micu3	0.000162205	-0.310726			Erbin	1.63133e-09	0.294691
	Wdr82	0.00323712	-0.384809			Enho	0.000166689	0.438559			Plxdc1	1.65674e-09	0.254437
	Mgmt	0.00326832	0.303174			Tle4	0.00016676	-0.303944			Plekhb1	1.68185e-09	0.360824
	Mxd4	0.00327995	-0.301737			LOC100361457	0.000168375	0.3283			Cyb5a	1.70103e-09	0.383423
	Sdc4	0.00329739	0.253129			Maml2	0.000170113	-0.386836			LOC100912618	1.80906e-09	0.424187
	Mat2a	0.00330494	0.415191			Usp6nl	0.000174262	-0.388494			Elof1	2.07549e-09	0.310663
	Ankrd17	0.00337338	0.271724			Mtss1	0.000174468	-0.367921			Ubxn1	2.16227e-09	0.340144
	Arf4	0.00345159	-0.539822			Fkbp1a	0.000176979	0.37103			Tmem159	2.20079e-09	0.313714
	LOC689574	0.0035005	0.311035			Dpyd	0.000178275	-0.397694			Rpl37	2.43048e-09	0.28167
	Asxl1	0.00353873	0.272326			AABR07006724.1	0.000178556	-0.302249			Nip7	2.44962e-09	0.250451
	Ankrd35	0.00356201	-0.290356			Smg5	0.000178584	-0.332927			Dpysl4	2.47814e-09	0.305173
	Slc6a11	0.00359206	-0.366982			Rfx7	0.000180395	-0.398313			Tuba1a	2.53572e-09	0.316076
	Rps10l1	0.00360074	0.32977			Pard3b	0.000181268	-0.299161			Igsf11	2.59677e-09	-0.548256
	Rbm5	0.0036068	-0.280092			Aldoc	0.000183517	0.256566			Stub1	2.66432e-09	0.325746
	Nfkbiz	0.00367102	0.358953			Bola2	0.000184662	0.404484			Cox6b1.1	3.00761e-09	0.267234
	Ypel3	0.00367752	0.255974			Jtb	0.000188188	0.356608			AABR07028839.1	3.11733e-09	0.32365
	Ssbp3	0.00371569	-0.318434			Plekhm3	0.000189305	-0.350474			Eno1	3.23486e-09	0.255587
	Bend4	0.00372241	0.267051			Nvl	0.000198573	-0.315795			Cox5a	3.32636e-09	0.350778
	Cct8	0.00373669	-0.32835			Zfp629	0.000198962	-0.315071			Fhl1	3.33478e-09	0.307449
	Etv6	0.00373897	0.387317			Aff1	0.000199966	-0.358988			Cox6b1	3.45445e-09	0.382983
	Exosc5	0.00379517	-0.334897			Svbp	0.00020176	0.41865			Lamp2	3.49004e-09	0.349482
	Nxpe3	0.00383038	0.291455			Agbl3	0.000206427	-0.386759			Atp5pf	3.74213e-09	0.363841
	Mbd3	0.00384382	-0.414793			F3	0.000214188	-0.286258			Rnh1	3.98702e-09	0.353221
	Cdc42ep5	0.00385445	0.304456			Sh3bp2	0.000214277	-0.284836			Nabp2	4.12073e-09	0.321559
	Il6r	0.00386322	0.26122			Elk1	0.000214613	-0.272786			Espn	4.17098e-09	-0.431423
	Baz2b	0.00389329	0.281832			Ptbp2	0.000215569	-0.294015			Nop10	4.87216e-09	0.320513
	Tnik	0.00393681	0.30744			Rpl22l1	0.000223745	0.449244			Spry2	5.24994e-09	0.292834
	Egfl6	0.00394162	-0.405289			Papss2	0.000225488	-0.32143			Eef1d	5.28999e-09	0.281173
	Tjp1	0.00394387	0.279294			Srebf2	0.000228809	-0.339608			Sema5a	5.29106e-09	-0.500977
	Eipr1	0.003957	-0.315456			Ppp4r3a	0.000234	-0.291063			Ndufb2	5.6624e-09	0.2891
	Clcf1	0.00397271	0.314388			Rhbdl3	0.000240204	-0.29196			Trir	5.73593e-09	0.296838
	Zc3h11a	0.00399931	0.307789			Tia1	0.00024235	-0.317068			Tmem50b	5.99629e-09	0.345612
	Sapcd1	0.00404391	-0.253331			Serf2	0.000245299	0.399801			Dpagt1	6.04901e-09	0.256214
	Rbm4	0.00410432	-0.308207			Gnb2	0.000251683	0.3233			Ndufa4	6.18003e-09	0.333316
	Dnajb2	0.00416997	-0.349851			Tab2	0.000252872	-0.279107			Ypel3	6.46074e-09	0.342982
	Frem1	0.00419962	-0.330064			Atxn2	0.00025307	-0.295359			Plec	6.54748e-09	0.307509
	Cmip	0.00420401	0.253152			Atf4	0.000254171	0.498361			Srgap3	6.56579e-09	-0.541139
	Syt12	0.00422029	-0.420787			Spaca6	0.000255596	-0.310218			Mapre1	6.75757e-09	0.339907
	Tuba1a	0.00426253	0.270957			Phc3	0.000257356	-0.343179			Mrpl54	6.97208e-09	0.296896
	Cpeb2	0.00430623	0.282352			Spcs3	0.000258067	-0.264637			Prpf4b	8.65109e-09	-0.56765
	Asb8	0.00432588	-0.334227			Luc7l3	0.00025815	-0.309755			Dach1	9.10875e-09	-0.381525
	Myrip	0.004337	0.272241			Tma7	0.000258363	0.386997			Icam1	9.13129e-09	0.408239
	Cxadr	0.00435906	0.28809			Cit	0.000258923	-0.253489			Elovl2	9.16048e-09	0.25178
	Rps27a	0.00439775	0.44431			Gria1	0.000260249	0.332392			Cct7	9.53856e-09	0.312714
	Mrpl18	0.00440374	-0.340126			Syt12	0.000261916	-0.288032			Per3	9.77239e-09	-0.477742
	Msi2	0.00441941	-0.260386			Nup214.1	0.000267206	-0.355022			Mrpl15	9.81026e-09	0.297085
	Fcgrt	0.00442448	-0.299727			NEWGENE-2134	0.000269122	-0.263426			Slitrk2	1.02381e-08	-0.584395
	Pxn	0.00442834	-0.312822			Cdh11	0.000279046	-0.333793			Yeats4	1.05473e-08	0.27623
	Mrpl35	0.00444903	-0.292776			Atp1a2	0.000280613	-0.482741			Snrpg	1.07504e-08	0.271628
	Cmpk1	0.00452804	-0.341051			Srgap2	0.000281261	-0.378205			Gamt	1.11798e-08	0.360279
	Spry2	0.00459665	0.320597			Tcf12	0.000285445	-0.292249			Itpr3	1.13069e-08	0.25221
	Dnajb14	0.00465173	-0.282186			Chn2	0.00028553	-0.330817			AABR07054400.1	1.14248e-08	0.336382
	Rps29	0.00473065	0.313114			St7l	0.000285804	-0.308195			Ets2	1.18321e-08	0.269615
	Sptlc1	0.00482839	-0.333956			Atp5mg	0.000299221	0.384458			Hes1	1.18382e-08	-0.698048
	Gabbr2	0.00485303	-0.309886			Gabrg1	0.000312695	-0.368063			Eftud2	1.22167e-08	0.35978
	Gab2	0.00485601	0.257019			Relch	0.000318372	-0.337964			Dynlt3	1.32167e-08	0.295736
	Ltbr	0.00492692	0.331447			Rbm26	0.000321921	-0.269704			S100a13	1.35435e-08	0.334192
	Plekho2	0.00494248	-0.42251			Tmem67	0.000323412	-0.308613			Pdap1	1.43435e-08	0.258534
	Arih2	0.00503905	-0.262724			Usp48	0.000324137	-0.262484			Arpc2	1.4943e-08	0.325425
	Swi5	0.00509607	-0.261717			Rps13	0.000325471	0.404101			Zcchc7	1.57733e-08	-0.53713
	Ralgps2	0.00514272	0.338971			Prr3	0.00033673	-0.36871			Sh3glb2	1.58982e-08	0.310032
	Ncald	0.00517178	0.316006			Thada	0.000343361	-0.321261			Glrx5	1.73268e-08	0.285481
	Khk	0.00520488	-0.28049			Ppp1r15a	0.000350745	0.532864			Rpl28	1.80345e-08	0.30958
	Nucks1	0.00523643	-0.347662			Igf2	0.000351804	-0.322977			Smim11	1.82764e-08	0.26561
	Cyb5a	0.00529208	-0.311007			Fam193a	0.000372971	-0.37113			Smap1	1.82809e-08	0.262731
	Mia2	0.0053688	-0.312178			Apc2	0.000379027	-0.314619			Celf2	1.87205e-08	-0.386381
	Rasa4	0.0053919	-0.293311			Srebf1	0.00038062	-0.343911			Eif3a	1.89967e-08	0.314351
	Yipf3	0.00543662	-0.336135			Rps5	0.000382018	0.359659			Atp1b2	1.96829e-08	0.375115
	Zscan12	0.00547302	-0.297695			LOC100360841	0.00038203	0.500627			Txn2	1.97637e-08	0.332574
	Elk1	0.0055597	-0.266824			Ube2g1	0.000383121	-0.369695			Pgam1	2.05942e-08	0.350935
	Cul1	0.00563457	0.325089			Arrb1	0.000383482	-0.350831			Mrpl52	2.23895e-08	0.28639
	Bptf	0.00563481	0.311506			Sil1	0.00038475	-0.323387			Coq10b	2.25626e-08	-0.762618
	LOC108348175	0.00583908	0.280058			Bst2	0.000384813	0.373436			Polr2e	2.36805e-08	0.330061
	Psmd1	0.00586002	-0.28494			Rarres2	0.000388992	-0.277427			Ndufa8	2.38744e-08	0.267973
	Hat1	0.00595231	-0.302092			Pik3r3	0.000395818	-0.3873			Ctnnd2	2.40577e-08	-0.464808
	Cox6c	0.00618385	0.291839			Ptcd3	0.00040506	-0.279719			Cox15	2.4281e-08	-0.712666
	Hif3a	0.0062401	0.282126			Mt-nd2	0.000408056	0.43914			Eef1g	2.47665e-08	0.332472
	RGD1311251	0.0062587	-0.266732			Fhl1	0.00041611	0.430669			Rab11a	2.60992e-08	0.280357
	RGD1309079	0.00630487	0.296094			Usp22	0.000418843	-0.256816			Arhgdia	2.84349e-08	0.34947
	Ulk2	0.00637122	-0.34394			Zscan21	0.000423346	-0.259688			Atp6v1f	2.95249e-08	0.342317
	AABR07027567.1	0.00638537	-0.374516			Slc33a1	0.000428529	-0.336296			LOC108348172	2.96706e-08	0.334004
	Map2k4	0.00639091	0.276356			Eif4g2	0.000446008	0.353591			Hs2st1	3.49921e-08	0.272228
	Lrp11	0.00652245	-0.285299			AABR07017145.1	0.000446496	-0.361638			Ensa	3.51644e-08	0.359989
	Dusp10	0.00653033	0.300156			Ndufb2	0.000447285	0.325392			Tcf4	3.77501e-08	-0.392782
	Armc2	0.00655903	-0.30722			LOC690468	0.00044733	0.401731			Ptch1	3.88934e-08	-0.47924
	Ssx2ip	0.0066317	0.353304			Pou2f1	0.000454726	-0.37268			Tacc2	3.94308e-08	-0.659052
	Arhgap42	0.00666697	0.298282			Slc39a1	0.000461749	0.445347			Romo1	3.96038e-08	0.259152
	Ift20	0.006667	-0.307076			Per3	0.000468047	-0.307074			Casc4	3.96554e-08	0.316303
	Tbl1x	0.00669582	0.282482			Epb41l5	0.000468274	-0.400927			Trmt112	3.99196e-08	0.343938
	Slc22a15	0.00674757	0.301787			Cryab	0.000471421	0.291811			Gap43	4.00943e-08	0.263761
	Itgb1	0.00675216	0.272581			Ndufb11	0.000471827	0.339342			Mt-nd4l	4.10703e-08	0.274398
	Creb5	0.00677487	0.289518			Rorb	0.000483891	-0.301014			Atp5if1	4.15385e-08	0.337697
	Kcnb1	0.00680575	-0.368573			Prex2	0.000484887	-0.359414			Negr1	4.24514e-08	-0.431031
	Baz1b	0.00698645	-0.3599			Cog4	0.000485724	-0.331213			Mapk10	4.32205e-08	0.297562
	Aarsd1	0.00701206	-0.258365			Zfp385b	0.000488845	-0.313756			Xrcc5	4.41045e-08	0.315534
	Rock2	0.00715358	0.334015			Rheb	0.000493661	0.337992			Hddc3	4.59535e-08	0.286625
	Ank2	0.00715911	0.27223			Gas6	0.000494269	0.281674			Anp32a.1	4.64074e-08	0.292133
	Srebf1	0.00717164	0.313738			Zfp638	0.000505291	-0.302724			Txnl4a	4.76464e-08	0.351017
	Mrpl52	0.00719699	0.304476			Wac	0.000509973	-0.324139			Odc1	4.76556e-08	0.272444
	Zmat1	0.00722956	-0.329986			Chmp2a	0.0005104	0.409909			Nbr1	4.78676e-08	-1.0066
	Gstk1	0.0072594	-0.323192			Selenom	0.000546891	0.420775			Nfkb1	4.98079e-08	0.345477
	Aif1l	0.00726046	-0.291694			Fam126a	0.000547846	-0.301977			Pde4d	5.05135e-08	-0.503473
	LOC100362027	0.00726463	0.397776			Klf4	0.000549308	0.455255			Mcee	5.05194e-08	0.268822
	Glrb	0.00729446	-0.334819			Rpl27a	0.000551864	0.381833			Pdlim3	5.10528e-08	0.305805
	Wdfy1	0.00735663	0.250393			Fgf9	0.000556852	-0.287115			Zfpm2	5.25623e-08	-0.65255
	Hist3h2ba	0.0074186	-0.308581			AC120310.1	0.000574522	0.356941			Trpm3	5.86963e-08	-0.268627
	Dhrs1	0.00745518	-0.287492			Tesk2	0.000578776	-0.377178			Nudt2	5.96052e-08	0.279218
	Myzap	0.00756184	0.313409			Etv5	0.000579514	0.401422			Gcsh	6.04653e-08	0.300117
	As3mt	0.00777762	-0.344057			Cox5b	0.000581896	0.327535			Nbl1	6.27765e-08	0.273839
	Trim35	0.00780399	-0.305064			Arl5a	0.000582871	-0.258481			Rab7a	6.29375e-08	0.313057
	Nek6	0.0078647	0.329497			Poln	0.000600378	-0.322965			Cetn2	6.47282e-08	0.252248
	RT1-CE1	0.00786874	0.259481			Zeb1	0.00060199	-0.278064			Hnrnpa1	6.58376e-08	0.305809
	Ust	0.00787195	-0.286072			LOC108349606	0.000602597	0.345835			Grik2	7.52708e-08	-0.562634
	Fosl1	0.00802397	0.555711			AABR07006860.1	0.000604253	-0.330637			AABR07052430.1	7.99912e-08	0.267052
	Lemd3	0.00804057	0.25099			Ccdc88a	0.000608377	-0.283635			Efemp1	8.00304e-08	-0.330553
	Rassf1	0.0080674	-0.548332			Csrp1	0.000616372	0.373106			Mrpl27	8.16102e-08	0.311977
	Ttyh3	0.00807788	-0.328663			Xrn1	0.000619322	-0.31445			Erh	8.2752e-08	0.330393
	Pde11a	0.00814471	0.403474			Nipbl	0.000630811	-0.25828			Kdr	8.48395e-08	-0.266698
	Tpcn1	0.00815723	-0.317983			Fgfrl1	0.000633108	0.393149			Dkk3	8.50711e-08	-0.280072
	Csnk1g3	0.00831017	0.313735			LOC100362830	0.000635844	0.406481			Nrcam	8.65278e-08	-0.371578
	Pold4	0.00837974	0.548611			St3gal3	0.000640342	-0.38942			Mfap2	8.66538e-08	-0.59536
	Apba2	0.00842343	0.371694			Atp5mc3	0.000648588	0.370365			Cnp	8.74157e-08	0.304785
	Larp4b	0.00858539	0.280173			Snapc2	0.000670537	0.26178			Tmem160	8.79398e-08	0.254241
	Chi3l1	0.0087952	0.635545			Tpd52l1	0.000674126	0.254617			Atp6v0b	8.92527e-08	-0.410435
	Gars	0.00881096	0.253049			Gamt	0.000676691	0.384158			Eef2	8.95502e-08	0.346752
	Adgrg1	0.00881464	0.260578			Ralgps1	0.000677953	-0.339182			Sf3b1	9.60628e-08	-0.536769
	Tmem14c	0.00890789	-0.323279			Id1	0.00067897	-0.305768			Atp5pd	9.80716e-08	0.311499
	Map1a	0.00899773	0.260862			Lmna	0.000686659	0.340337			Ubl3	9.84319e-08	0.276727
	Rpl14	0.00906386	0.280833			Dpf3	0.000695615	-0.378568			Pkig	9.98668e-08	0.28781
	RGD1565616	0.0091234	0.255856			St3gal5	0.000697997	-0.280103			Snrpe	1.01627e-07	0.271064
	Unc50	0.00923749	-0.294833			Colec12	0.000702505	-0.449273			Itpr1	1.10839e-07	-0.554231
	Akap13	0.00924655	0.333256			Stat5b	0.000709784	-0.328178			Stk35	1.11237e-07	-0.609966
	Agap1	0.00948086	0.288355			Dpy19l3	0.00072674	-0.300012			Mrps33	1.12956e-07	0.28862
	Crem	0.00953259	-0.394707			AABR07040864.1	0.000727333	-0.528529			Ikbkb	1.13808e-07	0.260168
	Ninj1	0.00956503	0.252774			Pcare	0.000728628	0.304182			Necap2	1.19432e-07	0.294587
	Adgrv1	0.00973705	0.30754			Pcm1	0.00073121	-0.325644			Efhd2	1.3099e-07	0.250189
	Smim12	0.00983642	-0.275292			RGD1310951	0.000757692	-0.402212			Ubl5	1.32445e-07	0.299663
	Copb1	0.00995997	-0.31327			Afdn	0.000761893	-0.33824			Gmpr	1.38504e-07	0.282958
	Hadhb	0.00996263	0.255854			Nme1	0.000785045	0.462918			Zbtb20	1.4462e-07	-0.384967
	Selenos	0.0100192	-0.278473			Ptprr	0.00079392	-0.388319			Hadhb	1.64177e-07	0.296719
	Atp5if1	0.0100941	0.299887			Cog5	0.000802487	-0.305534			Timm13	1.68957e-07	0.298219
	Ubac2	0.0101165	-0.312559			Rida	0.000803974	0.405369			Rab11b	1.69185e-07	0.309041
	Peg3	0.0101249	-0.263389			Ednra	0.000804703	-0.305395			Prdx1	1.73257e-07	0.267909
	Csad	0.0101776	-0.294286			Hepacam	0.000807263	-0.276713			Prss56	1.73974e-07	1.07417
	Npm1	0.010484	-0.273566			Ncoa1	0.000807842	-0.276978			LOC102556337	1.75254e-07	0.342313
	RGD1310352	0.0105159	0.254678			Hsd17b12	0.000809657	-0.255444			Arf5	1.77796e-07	0.290902
	Atp6v0a1	0.0105267	-0.311512			Tubgcp5	0.000823465	-0.305353			Brk1	1.88909e-07	0.301848
	Chn2	0.0105924	0.292886			Bckdhb	0.000833182	-0.432227			Dpm2	2.08132e-07	0.285878
	Klhl2	0.010729	0.328643			Akt3	0.000839681	-0.25399			Tmcc3	2.40357e-07	0.283926
	Mpc1	0.0108182	-0.304817			Rbfox2	0.000842941	-0.345066			Pros1	2.51007e-07	0.323622
	LOC499331	0.0108981	-0.272675			Nol4	0.000843922	-0.361637			Sox6	2.52536e-07	-0.565451
	Stip1	0.01128	-0.356926			Col11a1	0.000844498	-0.449662			Txndc17	2.59566e-07	0.253063
	Tra2a	0.0113102	-0.286323			Abi1	0.000847291	-0.313119			Strap	2.60495e-07	0.258896
	Ube2a	0.0113951	-0.259877			Fam193b	0.000849457	-0.254077			Sptssa	2.8271e-07	0.294949
	Vps37b	0.011443	-0.406391			Yeats2	0.000850014	-0.329465			Hspd1	2.84357e-07	0.277438
	Sarnp	0.0114807	-0.287983			Pde7b	0.000853237	-0.328288			Cfh	2.89914e-07	0.356322
	LOC100360841	0.0115102	0.301041			Ptbp3	0.000854574	-0.25877			Inpp5f	3.0276e-07	0.337006
	Ssbp2	0.011523	-0.277734			Lrch3	0.000860935	-0.280887			Wbp1l	3.04744e-07	0.268393
	Gnb3	0.0115427	0.429865			Slc7a8	0.000864999	-0.364514			Klhl2	3.13414e-07	0.286726
	Abcc5	0.0115534	-0.282228			Trip4	0.000867187	-0.271622			AABR07034315.1	3.21845e-07	0.33492
	Hmgcs1	0.0115795	0.253847			Arhgap21	0.000868649	-0.317659			Tst	3.26927e-07	0.306886
	Tnk2	0.011654	0.250004			Spata7	0.000876579	-0.256764			Tsen15	3.44544e-07	0.293977
	Jtb	0.0118348	-0.298287			Rnpc3	0.000880292	-0.337652			Adgrg1	3.57847e-07	0.263454
	Plppr4	0.0118479	-0.298032			N4bp2	0.00090351	-0.31738			Skp1	3.65428e-07	0.261714
	Crot	0.0120184	-0.272344			Pcsk2	0.000912796	0.562819			Kcnd3	3.73815e-07	0.289237
	Anp32e	0.012174	-0.324405			Ppp2r3c	0.000924405	-0.299791			Eif3f	3.7471e-07	0.312495
	Myl6	0.0122789	-0.304375			Ric1	0.000928741	-0.256872			Pink1	3.80097e-07	0.294335
	Trit1	0.0122852	-0.271834			Ubr2	0.00093654	-0.266239			Ctsd	3.80857e-07	0.393584
	Mcc.1	0.0123576	0.269037			Itfg1	0.000949186	-0.334024			Hikeshi	3.81922e-07	0.262281
	Robo2	0.0124362	0.294082			Sec62	0.000950713	-0.306306			Phf3	3.89704e-07	0.271972
	Bnip3	0.0124485	-0.376208			Prdm2	0.000957861	-0.300502			AABR07034669.1	3.99414e-07	0.312935
	RGD1309730	0.0125407	-0.267875			Mrpl57	0.000975077	0.309085			Dmxl2	4.01601e-07	-0.620691
	Dnajc15	0.0125642	-0.297893			Krcc1	0.000984117	0.359872			Gad1	4.03406e-07	0.254199
	Slc16a6	0.0126556	-0.270237			Col4a4	0.000993714	-0.486165			Slc25a21	4.0956e-07	-0.60918
	Pacsin3	0.0127763	-0.301496			Pak3	0.0010046	-0.483093			Avpi1	4.17979e-07	0.285238
	AC094217.1	0.0129627	0.358224			Banf1	0.00101388	-0.264478			Arglu1	4.29505e-07	-0.475861
	Tmem80	0.0129819	-0.268301			B4galt5	0.00101492	0.378023			Csrnp1	4.30972e-07	0.28952
	Pou3f2	0.0131692	-0.258052			Cux1	0.00101838	-0.330818			Arpc5	4.37412e-07	0.257709
	Tob1	0.0131775	-0.351946			Tbca	0.00102407	0.382682			Egln2	4.85861e-07	0.260292
	Sdf4	0.0132082	-0.301072			Mcu	0.00104131	-0.366205			Sh3glb1	4.87331e-07	0.257343
	Kcnab1	0.0132243	0.270851			Wdr70	0.00104598	-0.403966			Ube2l3	5.06648e-07	0.292377
	Adgrb2	0.013323	-0.33178			RGD1563680	0.00105855	-0.352777			Gdpd2	5.74762e-07	0.278814
	Rpl18	0.0134157	0.267128			Baz2b	0.00106109	-0.309109			Arl8a	5.91885e-07	0.287668
	St7l	0.0134908	-0.253777			R3hdm1	0.0010677	-0.300527			Fas	5.98802e-07	0.260212
	Rasl11b	0.0134929	0.267332			LOC301124	0.00108606	0.377836			Hdhd2	6.12983e-07	0.30497
	Nr4a3	0.0135222	-0.561651			Rpl22	0.00109604	0.352679			Akr1a1	6.15501e-07	0.278182
	Nfasc	0.0136652	0.251338			Vdac2	0.00110795	0.273927			Itgb1	6.53483e-07	0.310671
	Plod1	0.0136849	-0.284344			Spcs1	0.00112131	0.286659			Guk1	6.60874e-07	0.302939
	Nfkbia	0.0137264	0.560206			Edf1	0.00113015	0.316698			Trhr	6.82079e-07	-0.642065
	Rpl24	0.0137605	0.281012			Slc25a16	0.00113017	-0.258884			Ank3	6.9033e-07	-0.388086
	Scaf4	0.0138159	0.29414			Ndufb8	0.00114121	0.418035			Eif4h	6.92588e-07	0.308038
	Rab8b	0.0138604	0.251219			Gtf2h5	0.00114268	0.388364			Cnbp	6.9621e-07	0.264606
	LOC100363112	0.0141708	-0.261185			Hdac8	0.00116217	-0.409991			AABR07054319.1	7.19609e-07	0.285652
	AABR07068955.1	0.0143525	0.264082			Rsf1	0.00116558	-0.271402			Pir	7.22415e-07	0.275005
	Podxl2	0.0144318	-0.28033			Copg2	0.0012151	-0.252686			Rab21	7.41162e-07	0.27284
	Spart	0.0144392	0.260884			Supt6h	0.00121616	-0.261737			Mettl7a	7.74898e-07	-0.579134
	Pc	0.0145175	-0.290619			Kansl1l	0.0012188	-0.29334			Sfxn5	7.77499e-07	-0.407008
	Ankrd11	0.0145291	0.266204			Myzap	0.00122564	0.391625			Rps11	8.42865e-07	0.27023
	Eif3m	0.014554	-0.26767			Acer3	0.00123067	-0.392106			AABR07044711.1	8.48165e-07	0.255448
	Hmgn2	0.0146328	-0.309838			Myl12b	0.00124011	0.330229			Cryab	8.6781e-07	0.417735
	Junb	0.0147303	0.324341			Slc16a6	0.00125022	-0.417068			Mrps14	9.08894e-07	0.28659
	Pnn	0.0148134	-0.269301			Ndufa12	0.00125574	0.3705			LOC108348062	9.12501e-07	0.261569
	Msn	0.0150892	0.281907			Larp1	0.00125651	-0.377897			Rasl11b	9.18539e-07	0.322822
	Clns1a	0.0151276	-0.260104			Lgmn	0.00125729	0.289357			Tox3	9.38162e-07	-0.409142
	Msl1	0.0153946	-0.287559			Ifrd1	0.0012757	0.673395			Nr2c2ap	9.96347e-07	0.265318
	Ccnd1	0.0155257	0.280157			Ndufa13	0.00128148	0.331018			Cox7c	1.08172e-06	0.26087
	Map1b	0.0156079	0.307268			Fam13b	0.00129136	-0.334132			Eid1	1.09085e-06	0.301769
	Usp36	0.0156163	-0.318109			Nav3	0.00131361	-0.274136			Prr13	1.10487e-06	0.26953
	Necap1	0.01587	0.252086			Caln1	0.00132118	0.336211			Cep19	1.1186e-06	0.250777
	Mrps14	0.0161193	-0.253991			Tacc2	0.00132752	-0.348195			Rassf4	1.16672e-06	0.284051
	AABR07049085.1	0.0161864	0.275326			Pc	0.00132902	-0.312605			Leng8	1.17713e-06	-0.504629
	Srrm1	0.0163059	-0.279007			LOC100361645	0.00133667	0.374587			LOC687780	1.24908e-06	0.250691
	Sphk1	0.0168693	-0.25279			Abhd17b	0.00134827	-0.269658			Bex3	1.28818e-06	0.34136
	Ermard	0.0168726	-0.267732			Ywhae	0.00135486	0.265512			Klhl8	1.29893e-06	0.258415
	Gatd3a	0.0179892	-0.284286			Cblb	0.00137677	-0.255661			RT1-CE10	1.36413e-06	-0.51055
	Fbxo8	0.0183476	-0.285018			Mprip	0.00137993	-0.278672			Tspan12	1.39356e-06	0.26189
	Atm	0.0184739	-0.253551			Nbr1	0.00140323	-0.587698			Rap1gap	1.41582e-06	0.257433
	Cd48	0.0184963	-0.316717			Rnd3	0.00141631	0.354792			Atp5f1b	1.43825e-06	0.290451
	Tmprss5	0.0185392	-0.289923			Tmcc1	0.00141682	-0.338568			Arhgef26	1.45296e-06	-0.518868
	Gabpb1	0.0186919	-0.276009			Hadh	0.00143148	-0.287585			Igfbp7	1.47123e-06	0.281163
	Cavin3	0.019473	0.263764			Alk	0.00143917	0.378272			Dner	1.50564e-06	-0.523914
	Fbxl17	0.0196774	0.271321			Aass	0.00144394	-0.303805			Tm4sf1	1.57682e-06	0.364121
	S100a16	0.0198498	0.269492			Dguok	0.00144914	-0.253101			Tmem263	1.57757e-06	0.279356
	Srp14	0.0198701	-0.264597			Txnip	0.00146359	0.584868			Prkar1a	1.58164e-06	0.25818
	Sumo4	0.0199595	-0.323875			B4galt6	0.00146817	0.373825			Slc25a39	1.67236e-06	0.284838
	Higd1a	0.0200593	-0.253561			Caskin1	0.0014785	-0.294786			Arpc3	1.70086e-06	0.266517
	Pi4k2a	0.0202198	-0.286622			Emsy	0.00151077	-0.295827			Pcbp4	1.83173e-06	0.264208
	Ttc28	0.0202242	0.259774			Ubn2	0.00152173	-0.26775			Spcs1	1.89923e-06	0.276378
	Zfp706	0.0202866	-0.255424			Uqcr10	0.00152694	0.425226			Gstt3	1.91152e-06	0.308569
	Glt8d1	0.0203599	-0.266293			Litaf	0.00156736	0.314005			Rbbp7	2.14646e-06	0.289755
	Rpl36al	0.0203671	0.255287			Cyp2j10	0.00157061	-0.281854			Mrpl17	2.33506e-06	0.265127
	Pkdcc	0.0204224	-0.292973			Rpl11	0.00158931	0.374801			Pycr2	2.45943e-06	0.26604
	Pias2	0.0205124	0.25466			Serinc5	0.00158969	-0.262435			Fam184b	2.46494e-06	-0.62164
	Eif2s3y	0.020586	-0.287882			Naa15	0.00159465	-0.258737			Sumo1	2.51663e-06	0.283353
	Tex14	0.0205931	0.386438			Rps3a	0.00160079	0.325583			Ap2m1	2.56775e-06	0.261935
	Hepacam	0.0206784	-0.25456			Adam22	0.00160246	-0.284799			Elob	2.72306e-06	0.264592
	Psd2	0.0210013	-0.325272			Ist1	0.00162496	-0.278028			Mdfic	2.76787e-06	0.285853
	Cttnbp2	0.021063	0.276404			Erh	0.00163668	0.281268			Ptpn4	2.8124e-06	-0.541774
	Nup50	0.0210872	-0.270878			Senp7	0.00164094	-0.257434			Ier3	2.92248e-06	0.40077
	Rab5b	0.0210956	-0.25988			Aif1l	0.00166657	-0.259361			Rtn2	2.98812e-06	0.374039
	Tspan6	0.0213245	-0.265971			Dzip3	0.0016777	-0.253681			Luc7l2	3.03824e-06	-0.41836
	Vcl	0.0213617	-0.354502			Tmem33	0.00168228	-0.281716			Taf10	3.30231e-06	0.255663
	AABR07044900.1	0.0213895	0.25337			Dhrsx	0.00168938	-0.272408			Ddit4	3.35981e-06	-0.882786
	Sorbs3	0.0214377	-0.290172			Nedd8	0.00169282	0.395073			Samd4a	3.48852e-06	0.257552
	Tpp1	0.0215059	0.280697			Irf2	0.00173401	-0.320066			Cyba	3.5158e-06	0.264493
	Pgp	0.0216646	-0.261514			Mrps28	0.00174262	-0.322207			Ass1	3.78196e-06	0.260316
	Gtf3c2	0.0216663	-0.251484			Qser1	0.00177354	-0.307776			Sub1	4.01688e-06	0.282367
	Gstt2	0.0217537	-0.341576			Vps9d1	0.00177834	-0.286725			Akt3	4.05154e-06	-0.496029
	Pdcd6	0.0219615	-0.25086			Foxp1	0.00178607	-0.361221			Ppdpf	4.29372e-06	0.259543
	Ing1	0.0223882	-0.285913			Herc2	0.00178725	-0.284653			Ssbp2	4.75775e-06	-0.466989
	Pfkfb3	0.0226138	0.29515			Leng8	0.00179259	-0.291499			Tnrc6b	5.03428e-06	-0.354454
	Ldha	0.0227322	-0.279543			Mia2	0.00180033	-0.259172			Prdx5	5.33522e-06	0.264865
	Glmp	0.0228749	-0.250251			Eml5	0.00181159	-0.337232			Wscd1	5.34403e-06	-0.532339
	Ccs	0.0230408	-0.274878			Rhpn2	0.00182531	-0.326406			Cers6	5.51644e-06	-0.523812
	Ago3	0.0236313	-0.284556			AABR07060833.1	0.00183031	0.459487			Ap1s2	6.04671e-06	-0.554821
	Clasp2	0.023654	-0.25698			Gabrg3	0.00183328	-0.36601			Myl6	6.35477e-06	0.289701
	Arl2	0.0236909	-0.286716			Gmpr	0.00183956	0.29667			Mgst1	7.00956e-06	0.277165
	Styxl1	0.0239599	-0.253177			AABR07027567.1	0.00184536	-0.327312			Glrb	7.08249e-06	-0.562056
	Ash2l	0.0240367	-0.272569			Glmn	0.00185757	-0.317581			Cntn3	7.14477e-06	-0.617341
	Arhgef33	0.024233	-0.317258			Ddah2	0.00187045	0.364838			Tnfaip6	7.26602e-06	0.330535
	LOC100363469	0.0243367	0.36672			Scg2	0.00191805	0.711063			LOC100362453	7.59848e-06	0.277667
	LOC108349548	0.0244352	0.256375			RGD1311595	0.00192514	-0.406813			Tomm20	8.17059e-06	0.259392
	Ing2	0.0244352	-0.291126			Rps27	0.00192775	0.441937			Dennd1a	8.19245e-06	-0.424529
	Ajuba	0.0244444	-0.306577			Sec31a	0.00193325	-0.27341			Ncam1	8.27403e-06	-0.341293
	Eln	0.0245085	-0.270443			Dnmt3a	0.00193487	-0.279915			Dusp1	8.6287e-06	0.306007
	Tmem135	0.0245764	0.336508			Med29	0.00193511	0.362381			Slc7a11	8.81025e-06	0.363889
	Zfp566	0.0248331	-0.254755			Fnbp1	0.00194395	-0.271364			Pnpt1	9.34161e-06	-0.55423
	Memo1	0.0250089	0.25095			Helz	0.00194763	-0.326594			Col4a3	9.89195e-06	-0.670275
	Rras	0.0250288	0.29393			Dusp1	0.00198892	0.437776			Uqcrh	1.00993e-05	0.258668
	Tmem42	0.0251416	-0.253515			Tceal9	0.0019978	0.315027			Tbca	1.01373e-05	0.270649
	Iqcc	0.0254218	-0.254436			Rgs16	0.00200936	0.377015			Agbl3	1.0763e-05	-0.563184
	Sorbs2	0.025444	-0.295791			Timm8b	0.00206695	0.328822			Ciart	1.07984e-05	-0.62291
	Rchy1	0.0256261	-0.263335			Mtch1	0.00206696	0.338226			Casc1	1.08607e-05	-0.564928
	Prpf3	0.0256932	-0.26883			Prdx5	0.00209716	0.395371			Ttc3	1.09774e-05	-0.423434
	AABR07060133.1	0.0257188	-0.263365			Gal	0.00212593	1.6042			Tpm1	1.17345e-05	0.251787
	Rpl18a	0.0262888	0.276095			Rab2a	0.00213121	-0.254139			Amacr	1.32395e-05	0.263151
	Tbc1d19	0.0263739	-0.265065			Lrguk	0.00215367	-0.273376			Met	1.34466e-05	-0.545888
	Mxd3	0.0266693	-0.326838			Snn	0.00217094	0.391337			Tcf12	1.3726e-05	-0.382188
	Aldh6a1	0.0268055	-0.2606			Rab3b	0.00218286	0.373606			Gabrg3	1.39778e-05	-0.518164
	Ppp2r2a	0.0271033	0.274996			AABR07068955.1	0.00225172	0.423501			Gfra2	1.44006e-05	-0.519149
	Tusc3	0.0271583	-0.274121			LOC100363452	0.00226253	0.359143			Mboat2	1.47437e-05	-0.458879
	Ugp2	0.0272519	0.268909			AABR07060133.1	0.00226692	-0.27642			Slc38a3	1.55306e-05	-0.322625
	Gosr1	0.0273868	-0.25074			Ubap2	0.00227328	-0.302708			Srsf2	1.63029e-05	-0.299531
	Col22a1	0.0274751	-0.255624			Arid5a	0.00229063	0.582772			Col9a3	1.71176e-05	-0.52351
	Mapk4	0.0278298	0.273405			AABR07070555.1	0.00234875	-0.26539			Itm2c	1.7406e-05	0.254064
	Cry2	0.0284206	-0.43672			Dcaf6	0.00235	-0.2898			Apoc4	1.75546e-05	0.306356
	Pcdha12	0.0284398	-0.267323			Ndn	0.0023511	0.387069			Chka	1.989e-05	0.253122
	Akap8l	0.0286029	-0.29781			Cltb	0.00237256	0.299002			Robo2	2.02409e-05	0.29541
	Nbr1	0.0286098	-0.492558			RGD735065	0.00238783	-0.259976			Zfand5	2.09411e-05	-0.493612
	Whamm	0.0290434	0.269123			Hist3h2ba	0.00239562	0.426356			Spta1	2.14806e-05	-0.312341
	Jakmip1	0.0293406	-0.251642			Epha3	0.0024629	-0.299059			Plce1	2.17004e-05	0.259756
	Plekha7	0.0295216	-0.270645			Trip11	0.00251136	-0.28932			Pld2	2.2787e-05	-0.511398
	Cited2	0.0300243	0.733848			Psmb5	0.00252753	0.314745			AABR07031533.2	2.3703e-05	-0.546125
	Oxa1l	0.0309861	-0.263806			Gabarap	0.00253092	0.327832			Pcsk2	2.37146e-05	0.261954
	RGD1560108	0.0312556	-0.257781			Tjp2	0.00253233	-0.295027			Adgrl3	2.47955e-05	-0.405352
	Mt-co1	0.0316124	0.256497			Kdm5c	0.00253862	-0.264746			Maff	2.53488e-05	0.25611
	Mrps18a	0.0317799	-0.27913			Vgll4	0.00254429	-0.2962			Vegfa	2.62758e-05	-0.654943
	Ss18	0.0321717	-0.296684			Fam160a1	0.00261628	-0.3057			AABR07042840.1	2.92353e-05	-0.52975
	Rnaset2	0.0326389	-0.288344			S100pbp	0.0026246	-0.27383			Slco1c1	3.13748e-05	-0.513411
	Rps13	0.0333824	0.284354			Pgam1	0.00263317	0.327542			Errfi1	3.22978e-05	0.335981
	Prdx5	0.0336965	-0.313086			Slc4a7	0.00272376	-0.277427			Ush1c	3.24212e-05	-0.447363
	Psmc1	0.0337277	-0.257546			Zfyve9	0.00272985	-0.294125			Prim2	3.27942e-05	0.276297
	AABR07011996.1	0.0344209	-0.297968			Stk3	0.00278493	-0.297074			Susd4	3.31787e-05	-0.513746
	Cabp4	0.0349351	-0.289261			Cox7c	0.00281575	0.313029			Pik3r3	3.38955e-05	-0.535619
	Mrpl45	0.0356764	-0.274431			Pdcd6	0.0028433	0.358416			Bach2	3.45078e-05	0.292331
	Greb1	0.0357097	0.253246			Map1b	0.00285697	0.29785			Pip5k1b	3.57985e-05	-0.348161
	Ddx1	0.0370139	-0.269723			Ap1s1	0.00287072	0.338623			AABR07002848.1	3.66992e-05	0.326145
	Fbxl5	0.0370976	-0.300889			Etv4	0.00290307	0.310011			Chd2	3.80113e-05	-0.481323
	Wdr45b	0.0371207	-0.25729			Rgs6	0.00291122	-0.261602			Syce3	3.84804e-05	-0.458521
	Serpinh1	0.0371511	-0.332688			Sumo1	0.00297279	0.294472			Rsrp1	3.8581e-05	-0.362191
	Irf1	0.0377668	0.502401			Tmem192	0.00301562	0.287607			Atad2b	4.10905e-05	-0.510619
	Ldlrad3	0.0386735	-0.277122			Nudt2	0.00302276	0.332212			Tmprss5	4.45869e-05	-0.595507
	Pnrc2	0.0396261	-0.301653			Adcy2	0.0030487	0.334174			Sec62	4.6568e-05	-0.433011
	Thoc5	0.039807	-0.277464			Snx17	0.00308532	0.323444			Fez1	4.7663e-05	0.250464
	Eprs	0.0400232	0.261798			Hnrnpm	0.00309672	-0.334933			Ate1	4.83602e-05	-0.455912
	Sox5	0.0400618	-0.257297			Prdx6	0.00315296	0.320908			Cyp26a1	5.349e-05	0.482145
	Elmsan1	0.0401161	0.418085			Sos2	0.00315646	-0.253483			Epb41l5	5.38973e-05	-0.538982
	Ctxn3	0.0413178	-0.280596			Nfasc	0.00316445	-0.308099			Reck	5.49979e-05	-0.465743
	Alyref	0.0414734	-0.25718			Ube2k	0.00318136	-0.332571			Gal	5.55172e-05	0.531962
	Itfg1	0.0430285	-0.278094			Sv2a	0.00322397	0.264588			Prdx6	5.5662e-05	0.256094
	Lrrc49	0.0435055	-0.314939			Dmxl2	0.00322575	-0.291062			AABR07026125.1	6.08823e-05	-0.425802
	Rps4x-ps9	0.0435384	0.380312			Ass1	0.00324692	0.400497			Pmp22	6.32664e-05	-0.325933
	U2af1l4	0.0436451	-0.262204			Fchsd2	0.00324846	-0.282037			Zfp706	6.47409e-05	0.254734
	Tenm3	0.0440246	0.262483			Cdk12	0.00327307	-0.276603			P4ha1	6.72278e-05	-0.531965
	Abca1	0.0441502	-0.253583			Arl6ip5	0.00328061	0.287186			Fus	6.81969e-05	-0.403776
	Slc35b4	0.0444199	-0.263336			AABR07072078.1	0.00331091	0.252794			Sox2	6.822e-05	-0.305597
	Gucy1a2	0.0448624	-0.285385			Unc50	0.00331377	-0.267831			Snrnp70	8.00017e-05	-0.315151
	Sat1	0.0452889	0.255106			Rab11fip4	0.00333901	-0.31373			Nol4	8.44361e-05	-0.437468
	Sec22a	0.0476016	-0.269196			Brwd1	0.00334659	-0.272315			Ly75	9.04078e-05	-0.496352
	B4galt6	0.0479687	0.323647			Klhl12	0.00336919	-0.264506			Zeb2	9.24268e-05	-0.486678
	Spns1	0.0483118	-0.268957			AABR07044900.1	0.00338341	-0.292774			Lpar6	9.62465e-05	-0.527392
	Rbm33	0.0486606	-0.2623			Rps24	0.00343753	0.35881			Sos1	0.000107046	-0.552957
	Ddx50	0.0495825	-0.281403			Ndufa8	0.00344161	0.304519			Sdf2	0.000110978	-0.390266
	Casd1	0.0499484	0.283047			Zfp706	0.00348851	0.281932			Adamts12	0.000116309	-0.462829
	Paip1	0.050132	-0.258464			AABR07021871.1	0.00351202	0.326948			Arhgap32	0.000116484	-0.391305
	Bccip	0.0513385	-0.284542			Fus	0.00351698	-0.340837			AABR07060620.1	0.000137908	-0.510168
	Tmem203	0.0516839	-0.253711			Cacna1d	0.00360111	-0.3327			AABR07035916.1	0.000140778	-0.481905
	Pou2f1	0.0519914	-0.311674			Spon2	0.00360586	0.305138			Meis1	0.000156818	-0.359064
	Cntnap5c	0.0521626	-0.303919			Kdm5a	0.0036187	-0.328847			Akap8l	0.000156913	-0.470873
	Cntn1	0.0522813	-0.283905			Mtss1l	0.00362102	-0.266545			Plekho2	0.000169039	-0.566391
	Trak1	0.0528774	-0.314671			Cdk9	0.00368022	0.292658			Bambi	0.000173524	-0.543413
	Clk2	0.0529834	-0.252712			LOC103694169	0.0036871	0.469304			Gnao1	0.000181918	-0.41175
	AABR07044362.4	0.0531454	-0.27862			Pold4	0.00369197	0.330976			Dock3	0.000184126	-0.449634
	Ksr1	0.0533194	0.269335			Mapt	0.00371127	-0.295885			Exoc6	0.000199109	0.390089
	Ap4s1	0.0540153	-0.250343			Grid1	0.00373506	-0.286854			Son	0.000202526	-0.377739
	Gclc	0.0541116	-0.281795			Scmh1	0.00374376	-0.309416			Kansl1l	0.000205224	-0.474982
	Pfn1	0.0582815	0.345311			Mboat2	0.00384123	-0.285423			Ppp1cc	0.000220341	0.268579
	Klhl20	0.058972	-0.285295			LOC100360846	0.00386572	0.301154			Abcd3	0.000221205	-0.359492
	Scai	0.0596296	-0.269043			Mcm9	0.00387441	-0.278131			Polr2a	0.000228532	-0.485528
	Cntn3	0.0597549	0.272075			Gsdmd	0.0039301	0.259807			Pnp	0.000258896	0.275349
	Lpar6	0.0608283	0.25043			Frmd8	0.00393937	0.378969			Csf1	0.000261124	0.295706
	Cacnb4	0.0609536	-0.260901			Dock3	0.00397948	-0.333636			Clasp2	0.000294079	-0.380678
	Tra2b	0.0609905	-0.280712			Atr	0.00406392	-0.272406			Arl15	0.000305734	-0.415841
	Crim1	0.0613981	-0.251007			Fancc	0.00407304	-0.257392			Flrt2	0.000307861	-0.576363
	Pdia6	0.0621141	-0.265029			Nxn	0.0040976	-0.341817			Rftn1	0.000311829	-0.461268
	Ddit3	0.062344	0.500596			Oxr1	0.00410364	-0.258064			Col4a4	0.000339806	-0.449548
	Coq10a	0.0624444	-0.256036			Rpl10	0.00411052	0.323311			Aif1l	0.000341559	-0.489041
	Arrb1	0.0648463	0.251429			Rufy3	0.0041119	-0.275931			Srcap	0.000356745	-0.466843
	Sepsecs	0.0651012	-0.254477			Ankhd1	0.00414885	-0.292605			Abcc5	0.000360476	-0.379572
	Lrrk2	0.0652277	-0.342719			Gli2	0.00426812	-0.250085			Pde7b	0.000375431	-0.529766
	Clptm1l	0.0653194	-0.300358			Opcml	0.00427997	-0.266842			AABR07001061.1	0.000377046	-0.648538
	Lamp1	0.0658396	0.266749			Shisa6	0.00429067	0.357401			Fam169a	0.000386827	-0.426256
	Pcyt1a	0.0667352	-0.269169			Rpl36al	0.00432594	0.277961			Plpp3	0.000412916	-0.266982
	Rassf4	0.0668513	0.329527			Dcdc5	0.0043358	-0.311794			Srsf7	0.000451896	-0.37262
	Rpl32.1	0.0668566	0.270241			Ap2m1	0.00437005	0.34442			Dlg1	0.000455342	-0.388662
	Mfsd13a	0.0676903	-0.257126			Exoc6b	0.00437058	-0.32635			Colec12	0.000455469	-0.573146
	Pcmtd1	0.0680572	-0.276256			Pop5	0.0043866	0.258639			Baz2b	0.000455576	-0.331842
	Sfpq	0.0699628	-0.260992			Shisa5	0.00441794	0.350656			Epc1	0.000461931	-0.421118
	Ddrgk1	0.0706556	-0.268144			Rab11fip2	0.00442107	-0.257154			Pkp4	0.000462065	-0.546181
	Hsph1	0.0725688	-0.390282			Snrnp70	0.00443082	-0.267887			Pou2f1	0.000466924	-0.435307
	Cyc1	0.0739265	-0.258091			Slc10a7	0.00451143	-0.31343			Lrrc4c	0.000505572	-0.381776
	Alpk1	0.0746802	0.25887			LOC103693210	0.00453274	0.312665			Gli3	0.000523446	-0.410876
	Erc2	0.0749404	-0.274281			Sgip1	0.00461951	-0.285427			Gphn	0.000533977	-0.397536
	Rpl17	0.0749477	0.265201			Pithd1	0.00467905	0.323649			Supt20h	0.000537705	-0.446252
	Tbck	0.0762107	-0.254341			Arvcf	0.00475622	-0.26931			Six3	0.000550624	-0.335193
	Mdfic	0.076503	0.252483			Dlg1	0.00476	-0.337774			Slc7a3	0.000586678	-0.515625
	Mageh1	0.0784343	-0.283562			Rabac1	0.00477926	0.273137			Ube3a	0.000596214	-0.447792
	Ago4	0.080096	-0.301831			Aamp	0.00485494	0.32515			Kpna2	0.000599984	-0.543431
	Cox7a2l	0.0808402	-0.26116			Mapk1	0.00485869	-0.269492			Fgf9	0.000608218	-0.41126
	Mgst3	0.082974	0.301368			Tiparp	0.00492826	0.610035			Magi3	0.000642308	-0.400195
	Klf4	0.0829827	0.368138			Cox4i2	0.00493951	-0.305709			Nfkbia	0.00065747	0.265714
	RGD1597339	0.0950883	-0.27581			Phlpp1	0.00495158	-0.269888			AABR07045032.1	0.000720029	-0.42469
	Nop56	0.0982338	-0.356605			Coro2b	0.00502955	-0.307406			Mcu	0.000749452	-0.427249
	Stab2	0.100113	-0.32918			Clasp1	0.00507318	-0.256802			Cacna2d2	0.000758031	-0.397546
	Jarid2	0.100561	-0.252193			Atf3	0.00512588	0.278419			Sec22a	0.000763249	-0.401033
	Ech1	0.102062	-0.25085			Capzb	0.00518115	0.30426			Col9a2	0.0007891	-0.349781
	Foxp2	0.110816	0.388754			Kansl1	0.00520118	-0.309115			Col9a1	0.000821423	-0.396963
	Adamts19	0.114924	0.274822			Dvl1	0.00521957	0.259872			Maml2	0.00083876	-0.369679
	Snx13	0.118052	-0.259719			Pde10a	0.00526568	-0.362846			Slc26a7	0.000843145	-0.47425
	RGD1309748	0.118255	-0.261376			Trpc1	0.0052806	-0.30666			Clk1	0.000853289	-0.437294
	Kdm3a	0.119406	-0.252934			Plxdc2	0.00536227	0.317994			Lrig2	0.000865086	-0.465545
	AABR07012583.2	0.119622	0.250956			Tsc22d1	0.00542546	0.369406			Foxn3	0.000893237	-0.364177
	Sec24b	0.119658	-0.251756			Zmiz1	0.00550786	-0.266845			Dpm3	0.000898148	-0.461981
	Gapvd1	0.120258	-0.263066			Pde4b	0.00553577	-0.360632			Rbm26	0.000998028	-0.444986
	Coq10b	0.120812	-0.278527			Nfkb1	0.00557222	0.339556			Pxmp2	0.00101986	-0.453869
	AABR07042936.1	0.12272	0.259969			Rnf115	0.0056513	-0.270126			Luc7l3	0.00104388	-0.344006
	Cpeb4	0.124687	-0.256519			Swi5	0.00565698	0.282347			Tmcc1	0.0011052	-0.47527
	Cop1	0.133009	-0.282076			2024-03-08	0.00576444	-0.311241			Slc4a7	0.0011577	-0.510649
	Rpsa	0.136036	0.258785			Epb41l4a	0.00578116	-0.255393			Syt1	0.00117995	-0.480496
	Zfp36	0.136535	0.620115			Elof1	0.00580077	0.264343			Gpld1	0.00119222	-0.412474
	Hlf	0.142619	-0.261848			Ankfy1	0.00597474	-0.300578			Ctsh	0.00120618	-0.332261
	Gadd45b	0.144797	0.264251			Nsd1	0.0060012	-0.252667			Cux1	0.00122968	-0.420568
	Ift46	0.148601	-0.260955			Ubl5	0.00602816	0.275592			Erc2	0.00123847	-0.488695
	Btaf1	0.150852	-0.256389			Esd	0.00605034	0.301546			Unc80	0.00128332	-0.36891
	Timm8b	0.153853	0.250932			Phip	0.00610187	-0.355961			Cdh11	0.00129873	-0.361183
	Gal	0.170468	1.2006			Zc3h6	0.00615176	-0.261191			Nup98	0.00130938	-0.476728
	Rabl6	0.176766	-0.252177			Utrn	0.00616875	0.340165			Glis3	0.00134021	-0.466036
	Ndc1	0.185857	-0.258035			Akt2	0.00629365	-0.250754			Atp1a1	0.00138588	-0.301577
	Dcdc5	0.189758	-0.250797			Zfp827	0.00630076	-0.278355			Kcnma1	0.00139582	0.373626
	Igtp	0.190319	0.26288			Fbxl4	0.00633952	-0.301952			Acsl3	0.00142363	-0.297661
	Rtbdn	0.193027	-0.344674			Adgrl2	0.00634969	-0.255788			Ccdc141	0.00143059	-0.446658
	Wdr7	0.193724	-0.260061			Usp9x	0.00636335	-0.257193			Arhgef33	0.00152177	-0.474264
	Stard13	0.195352	-0.269838			LOC100360573	0.00639278	0.351751			Phlda1	0.00154156	0.424248
	Fbxo9	0.207765	-0.257196			Efna5	0.00643643	-0.292047			RGD1307100	0.00154879	-0.304715
	Cdk11b	0.208359	-0.27616			AABR07042936.1	0.00647943	0.292628			Pde11a	0.00156269	-0.328892
	Rab11fip2	0.226813	-0.253857			Ksr1	0.00649291	-0.269381			Setd5	0.00167953	-0.37751
	Gngt1	0.230723	0.274373			Arf4	0.00651686	0.326106			Gucy1a1	0.00176794	-0.470392
	Dusp1	0.253492	0.38678			Msn	0.00652797	0.331021			Nr2e1	0.00178419	-0.488106
	Gpr153	0.255055	-0.271835			Olfm2	0.00657392	0.280882			Hnrnpm	0.00184451	-0.4263
	S100a4	0.285396	0.272694			Ulk2	0.00660971	-0.260732			Tspan5	0.00187814	-0.361157
	Errfi1	0.30731	0.38303			Iffo1	0.00661822	-0.256257			Cmtm5	0.00197197	-0.307665
	Hspe1	0.37203	-0.251433			Srbd1	0.00663077	-0.297645			Narf	0.00222972	-0.429544
	Gstp1	0.416354	0.25347			Med12l	0.00664452	-0.312303			Arvcf	0.00225069	-0.375085
	Ppp2r2b	0.448839	0.383715			Crebbp	0.00682653	-0.292874			Cct6b	0.00232446	-0.262615
	Tpt1	0.469305	0.333567			Lrig2	0.00683786	-0.256824			Zfp36l1	0.00240739	-0.366005
	Scg2	0.475377	1.73407			Clvs1	0.00686051	-0.635784			Eif3el1	0.00244193	-0.282232
	Clvs1	0.478039	-0.353508			Sox6	0.00689211	-0.306678			Tyw5	0.00246569	-0.426617
	Ptprr	0.514545	0.250509			AABR07025295.1	0.00695382	-0.340565			Strn3	0.00255731	-0.323985
	Sod2	0.527427	0.332221			Smg6	0.00696531	-0.336076			Adgra2	0.00262975	-0.449212
	Guca1a	0.608656	-0.380495			Zfp36	0.00715356	0.517763			Arid1b	0.00265	-0.312229
	Pdc	0.977861	-0.371114			Bles03	0.00722462	0.349158			Megf9	0.00281783	-0.48674
						Atp5po	0.00723653	0.310931			Klrb1a	0.00293837	-0.533881
						Hikeshi	0.00724482	0.294924			Atp6v0a1	0.00300322	-0.377705
						Rpl27	0.00729933	0.300177			Rps6ka3	0.00313695	-0.405295
						LOC100909913	0.00737586	0.291204			Cog5	0.00321905	-0.329423
						Cald1	0.007404	0.313439			Rabgap1	0.00322413	-0.380703
						Ost4	0.00745627	0.281744			Sod2	0.00328499	0.273613
						Kdm6a	0.00746034	-0.306			Uba6	0.00341057	-0.43962
						Zfpm2	0.00762362	-0.306656			Cry2	0.00341924	-0.716911
						Map7d1	0.00766672	0.296702			Srek1	0.00346478	-0.374709
						Rabgap1l	0.00770953	-0.25514			Atf2	0.0034721	-0.414122
						Anp32a.1	0.00774978	0.270384			Kdm4c	0.00360561	-0.410654
						LOC108348172	0.00776472	0.298201			Rapgef2	0.00372464	-0.323737
						Atp5f1d	0.00780488	0.277411			Babam2	0.00374108	-0.434603
						LOC103693430	0.00787326	0.330725			Ubr3	0.00416141	-0.380949
						AABR07002848.1	0.00791513	0.310978			Mapk8	0.00416737	-0.412635
						AABR07007675.1	0.00806631	0.308707			Zfp423	0.00438435	-0.260447
						Nudt9	0.00807487	0.289158			Hspa4l	0.00446667	-0.36521
						Mta1	0.00808347	0.279062			AABR07028902.1	0.00448809	-0.483026
						Ngb	0.00809465	0.339586			Tenm3	0.00449861	-0.426563
						Pros1	0.00812578	0.365347			Sipa1l1	0.00451776	-0.371541
						Plin2	0.00815235	0.406518			Nfat5	0.00465698	-0.339511
						Prkar1a	0.00827106	0.29516			Sesn3	0.00467594	-0.423866
						Trim9	0.00840541	-0.266209			S100a3	0.00471397	0.544001
						Hlf	0.00844929	-0.292279			Slc2a1	0.00481751	-0.375042
						Wdr1	0.00845505	0.320998			Gstt2	0.00485065	-0.464787
						Sobp	0.00855058	-0.311815			Zfp629	0.00512033	-0.340935
						Slc7a5	0.0085835	0.349197			Chn1	0.00519272	-0.32922
						Ssh1	0.00866345	-0.315806			Gpatch8	0.00537058	-0.38502
						Ppp1ca	0.00866539	0.293799			Capn13	0.00542125	-0.339989
						Ackr3	0.00874448	-0.270502			Tanc2	0.00547095	-0.396458
						Ctnnal1	0.00877209	-0.274678			Penk	0.00547904	-0.253955
						Iscu	0.00883092	0.315955			Lrrtm3	0.00548554	-0.437046
						Gng10	0.00883956	0.292459			Wnk2	0.00562177	-0.377115
						Rps6kc1	0.00885582	-0.282908			Rcor1	0.00570229	-0.349262
						Wdr20	0.00886113	-0.269712			Suco	0.00576959	-0.458545
						Tax1bp3	0.00886403	0.262097			Abat	0.00577045	-0.40851
						Spry2	0.00889515	0.279284			Slc1a2	0.00590646	-0.402593
						Ets2	0.00891632	0.313148			Nf1	0.0061926	-0.279388
						Mtmr9	0.00898516	-0.257209			Kdm6a	0.00619719	-0.339182
						Cct7	0.00898605	0.320864			Klf12	0.00620598	-0.334893
						Mpst	0.00901502	0.343411			Six6	0.00656162	-0.285488
						Ccnjl	0.00909809	-0.273554			Chd6	0.00657174	-0.3408
						AABR07044711.1	0.00912384	0.34975			Efna5	0.00672234	-0.348451
						Ifngr2	0.0093186	0.279989			Asphd2	0.00676126	-0.258331
						Cdc42ep5	0.00933803	0.275255			Odf3b	0.00679399	-0.304018
						Ptges3	0.00939263	0.260791			Sox9	0.00690777	-0.364287
						Rbm3	0.00943824	0.308216			Cdon	0.00691739	-0.476427
						AABR07068272.1	0.00956094	-0.267474			Asph	0.00717693	-0.257225
						Sos1	0.00960674	-0.311354			Cadps2	0.00730928	-0.482577
						Arap1	0.00961834	-0.275164			Timp3	0.00736567	-0.354268
						Cdk11b	0.00963432	0.440814			Dab2ip	0.0073901	-0.291944
						Utp23	0.00964918	0.264843			Cdk13	0.00755554	-0.35429
						Tango6	0.00989554	-0.309834			Pspc1	0.00755831	-0.412375
						Sertad1	0.00990572	0.26418			Adgrl2	0.00770565	-0.442766
						Vps28	0.0100296	0.30474			Herc1	0.00777305	-0.392696
						Pdlim3	0.0100606	0.343159			Me3	0.00782101	-0.364401
						Ndufs5	0.0102898	0.308325			Gtf3c2	0.00786904	-0.386994
						Spast	0.0103254	-0.277972			Folh1	0.00796586	-0.266456
						Pmm1	0.0103283	0.307542			Man2a2	0.00822413	-0.4227
						2024-03-02	0.0110789	0.27865			Pafah1b1	0.0082507	-0.279593
						Macrod1	0.0111775	0.326379			Esyt2	0.00826713	-0.330625
						Bex3	0.0111905	0.26704			Apc2	0.0084072	-0.349624
						N4bp2l2	0.0112638	-0.273217			Car11	0.00861596	-0.415527
						Txnl1	0.0113195	0.263196			Slc45a2	0.00873259	-0.325468
						Phactr4	0.0113469	-0.280327			Slc16a6	0.00897878	-0.4335
						Slc25a17	0.0113645	0.306668			Tom1l2	0.00917717	-0.394061
						Nme4	0.0114757	0.326604			Ptma	0.0094475	-0.350796
						Ndufb4	0.0115225	0.274189			Zfp292	0.00950491	-0.380213
						Tp53	0.0119237	0.273149			Avil	0.0095839	-0.284483
						Elmsan1	0.012096	0.40742			Eps15	0.00963956	-0.331584
						Sin3b	0.0123052	0.267711			Cdk11b	0.00969142	-0.418891
						Rexo2	0.0123597	0.273937			Usp15	0.00977232	-0.382919
						Ssbp4	0.01239	0.274			Pten	0.010335	-0.37414
						Snrpd2	0.0123937	0.306533			Sorbs2	0.0103614	-0.369075
						Tm9sf4	0.012561	-0.271165			Larp1	0.0106664	-0.383253
						RGD1310352	0.0126215	0.376601			Brd8	0.0108446	-0.330405
						Mamdc2	0.0127669	-0.295538			Zmym4	0.0108602	-0.344499
						Glud1	0.0129438	0.290288			Rims2	0.0108841	-0.440445
						Ints8	0.0130778	-0.268953			Zfp644	0.011852	-0.37499
						Ccnh	0.0130796	0.271292			Notch1	0.0118663	-0.333265
						Samd4a	0.0130902	0.284075			Sfpq	0.0119022	-0.351854
						Stk39	0.0133486	-0.281713			Grin2c	0.0123283	-0.26956
						Trhr	0.0134498	-0.305002			Adam22	0.0123977	-0.452709
						Cntrl	0.0136529	-0.281492			Ppp1r10	0.0124554	-0.307481
						Trir	0.0137002	0.325637			LOC500331	0.0124957	-0.271993
						Drap1	0.0137294	0.289918			Efnb2	0.0126926	-0.447348
						Plat	0.0139102	0.381732			NEWGENE-2134	0.0128475	-0.276614
						LOC100362453	0.0139801	0.344517			Rit2	0.0130246	-0.309144
						Slc2a1	0.0139895	-0.533177			Xpr1	0.013248	-0.373985
						Rprd1a	0.0140239	-0.302936			Mib1	0.0134768	-0.398148
						Megf8	0.014074	-0.270592			Arhgap5	0.0136064	-0.253563
						Atp6v0d1	0.014139	0.319432			Ccdc138	0.0137492	-0.345064
						Cdk14	0.0143268	-0.285628			Gabrg1	0.0139417	-0.263977
						Ltbp1	0.0144311	0.304803			Rtel1	0.0139788	-0.254177
						Sec61b	0.0144451	0.336193			AABR07059168.2	0.0144521	-0.337317
						Lrif1	0.0144899	-0.346902			Zswim5	0.014667	-0.403155
						Rit2	0.0145063	-0.269837			Zhx2	0.0147699	-0.396712
						Hes6	0.0145063	0.325308			Slc30a9	0.015406	-0.380128
						Uqcrc2	0.0145371	0.253433			Dpp8	0.0154146	-0.364387
						Spint2	0.0145491	0.28167			Chrdl1	0.015801	-0.325095
						Tut1	0.0145898	-0.277496			Abhd8	0.0161339	-0.316958
						Gadd45a	0.0147798	0.253216			Abca8	0.0161916	-0.367909
						Ago3	0.0148637	-0.266129			Tbc1d5	0.0162314	-0.38339
						Apba2	0.0149235	0.295663			Grid1	0.0162388	-0.379464
						Rpl37a	0.0151279	0.270367			C1qtnf3	0.0163908	-0.356387
						Pcbp4	0.0155034	0.260998			Tent2	0.0167421	-0.361809
						Mt3	0.0155564	0.337214			Lipa	0.0169242	-0.267047
						Six6	0.0160684	0.317595			Mtus1	0.0171853	-0.383389
						Phyhd1	0.016114	0.298398			Phlpp1	0.017216	-0.254177
						Txndc17	0.0165417	0.258966			Helz	0.0173877	-0.379663
						Sdcbp	0.0165704	0.28955			Eml4	0.0174747	-0.385711
						Arhgdia	0.0166555	0.262808			Snx24	0.0176247	-0.290701
						Ogt	0.0168025	-0.250285			Lrrc66	0.0179043	-0.301054
						Rbm6	0.0168285	-0.259472			Exoc6b	0.0183976	-0.330806
						Scfd2	0.0168917	-0.271767			Phf14	0.0184544	-0.32222
						Cs	0.0169351	-0.270437			Thoc2	0.0187578	-0.383922
						Sox9	0.0169621	-0.261155			Ptprr	0.0187741	-0.370012
						Ell2	0.0171563	-0.371072			Kcnip4	0.0189757	-0.364552
						Use1	0.0172055	0.276886			Tia1	0.0191973	-0.335579
						Mdga2	0.0174087	-0.269368			Caap1	0.0193079	-0.338168
						Fgfr1	0.0174642	0.272196			Pogz	0.0194482	-0.371006
						Mcrip1	0.0175061	0.265775			Nav3	0.0199266	-0.35278
						Zfc3h1	0.0175738	-0.261676			Cit	0.0199846	-0.384114
						Rnls	0.0176789	-0.323597			Rmdn1	0.0200801	-0.371556
						Rhob	0.0178286	0.340081			Ep400	0.0203086	-0.324806
						Phf21a	0.017841	-0.271375			Slc7a8	0.0203292	-0.354256
						Tomm20	0.0178784	0.295392			Cntn1	0.0203773	-0.350883
						Col18a1	0.018127	-0.258945			Hap1	0.020676	-0.261716
						Stub1	0.0181828	0.320515			Foxp1	0.020756	-0.387255
						Ahctf1	0.01825	-0.29578			Atr	0.0207933	-0.255151
						LOC687780	0.0185916	0.253697			Nktr	0.0207993	-0.32567
						Ubap2l	0.0186541	-0.289292			Pdlim5	0.0208184	-0.324141
						Terf1	0.0190155	-0.252897			Letm2	0.0208302	-0.360888
						Sf3b2	0.0191547	0.255184			Ankhd1	0.0215443	-0.309538
						Slc25a3	0.0193409	0.277703			Scn1a	0.0218497	-0.372255
						Eda	0.0194492	-0.366378			Mob3b	0.0219646	-0.383157
						Sirpa	0.0196744	0.258912			Arel1	0.0221522	-0.41151
						Ubxn1	0.0197136	0.285457			Sorbs3	0.022889	-0.405103
						Scrn1	0.0198846	-0.27996			Pard3b	0.0232182	-0.264802
						Exoc6	0.0201884	0.482239			Amph	0.0235574	-0.367748
						Sfr1	0.0203284	0.252693			Nrarp	0.0238044	-0.388343
						Dennd4c	0.0207373	-0.255055			Colgalt2	0.0239723	-0.382526
						Spidr	0.0211156	0.318475			Zfp386	0.0240666	-0.343427
						Ntan1	0.0212374	0.270692			Map4k4	0.0246674	-0.404235
						Vdac3	0.0213267	0.314482			Pip5k1a	0.0248401	-0.42059
						Dcaf1	0.021523	-0.254266			Kcnj13	0.025136	-0.270761
						Efhd2	0.0215749	0.326785			Birc6	0.0254078	-0.313518
						Atad1	0.0216224	-0.251769			Camkmt	0.0256425	-0.359541
						Iah1	0.0217176	0.253158			Aarsd1	0.0263249	-0.306855
						Col16a1	0.0218499	0.351015			Cdk12	0.0264305	-0.334668
						Slc25a39	0.0219153	0.265605			Senp7	0.026874	-0.363292
						Shisal1	0.0219789	0.252076			Ano1	0.0269342	-0.302358
						Tmem50b	0.0222106	0.272659			Acsl4	0.0277526	-0.270302
						Rrbp1	0.0224324	-0.253881			Ralgapa1	0.0280604	-0.3646
						Flot1	0.0227556	0.329751			Kansl1	0.0285826	-0.334473
						Usp15	0.0228496	-0.260366			Plcb4	0.0286774	-0.257273
						Vps41	0.02317	-0.250485			Relch	0.0287145	-0.320905
						Stk10	0.0232785	-0.268818			Ildr2	0.0287853	-0.318499
						Socs5	0.02345	0.29577			Fryl	0.028994	-0.292981
						AABR07065091.1	0.023586	0.36236			Ddx17	0.0291769	-0.361247
						LOC108348062	0.023644	0.290234			Crebbp	0.0292064	-0.302269
						Slc38a1	0.0236926	-0.294527			Phc3	0.029215	-0.316053
						Rhoa	0.0237471	0.253683			Mapk1	0.0292833	-0.357278
						Ybx3	0.0238581	0.292604			Fbxw4	0.0294104	-0.312329
						Mdh1	0.0243511	0.300715			Bcat1	0.0294509	-0.312747
						Csf1	0.0247777	0.306996			Srebf2	0.0295385	-0.304653
						Ltbr	0.0249997	0.282835			Prox1	0.0299258	-0.268742
						Nrxn1	0.025893	0.29621			Anapc4	0.0300251	-0.366166
						Pik3r1	0.0262551	0.303404			Rfx3	0.0304588	-0.409166
						Icam1	0.0263116	0.38166			Olfm1	0.0308891	-0.282835
						Fbxl17	0.0269045	-0.273816			AABR07065091.1	0.0311496	-0.481376
						Calm2.1	0.0275286	0.252109			Yeats2	0.0312213	-0.332276
						Tenm2	0.0285284	-0.254753			Mtif2	0.0312773	-0.32767
						Tent4b	0.0286395	-0.281237			Abca5	0.0313276	-0.346902
						Greb1	0.0287108	0.321846			Ubn2	0.0317285	-0.345193
						Pcnx1	0.0288518	-0.266521			Map2	0.0320097	-0.262608
						Sntb2	0.0288781	-0.261234			Zyg11b	0.0321631	-0.259786
						Ndc1	0.0291419	-0.252266			Alg2	0.0322291	-0.304337
						Tomm22	0.032123	0.267938			Prkca	0.0322416	-0.399973
						Tlk2	0.0324053	-0.252401			Xrcc4	0.0325101	-0.327245
						Tmem223	0.0324839	0.263765			Rps6ka2	0.0327378	-0.292094
						Arpc1a	0.0327986	0.309576			Krit1	0.032842	-0.365973
						Psma6	0.0344178	0.27563			Pomt2	0.0329327	-0.314984
						LOC498555	0.0344659	0.313878			Tob1	0.0337157	-0.305666
						Nenf	0.0360548	0.263682			Lrrc17	0.033934	-0.291845
						Pds5a	0.03614	-0.338365			Col11a1	0.0343608	-0.401889
						AABR07012583.2	0.0362227	0.358516			Copg2	0.0344332	-0.318108
						Ext1	0.0368794	-0.259976			Tesk2	0.0345903	-0.328882
						Commd8	0.03723	0.270291			LOC103690120	0.0348827	-0.31382
						Psme1	0.037357	0.271778			Map4k3	0.0351329	-0.337486
						Casd1	0.0376153	-0.295545			Fcf1	0.0354427	-0.313076
						Lamc1	0.0381145	-0.252885			Pla2g4a	0.0354881	-0.415055
						RT1-M3-1	0.0381649	0.278649			Dmxl1	0.0355477	-0.310229
						Tcf7l1	0.0381755	-0.310599			Fnbp4	0.0374746	-0.36729
						Ctxn3	0.038785	0.280038			Itfg2	0.0375758	-0.306373
						Enox1	0.0388593	0.291169			Cabp4	0.0376684	-0.353536
						Phkb	0.0394049	-0.259598			Maco1	0.0391122	-0.377503
						Ube2d3	0.0397956	0.250997			Lrif1	0.0393356	-0.330925
						Zfand6	0.0409001	0.252312			Ptgs2	0.0394171	-0.360934
						Chsy3	0.0417424	-0.273606			Ncoa1	0.0408442	-0.310868
						Mkln1	0.0419758	-0.275583			Dpy19l3	0.0411102	-0.305522
						Eef1b2	0.0421707	0.254616			Kif13a	0.0413563	-0.314175
						Zfand5	0.0432577	0.337383			Nfib	0.0418243	-0.255856
						Myl6	0.0439217	0.264938			Pcm1	0.0423974	-0.251205
						Mcfd2	0.0443687	0.256878			Smg6	0.0427465	-0.355079
						Akap12	0.0444145	0.447118			Strada	0.0430971	-0.305673
						Pde5a	0.0446662	0.308184			Cast	0.0432471	-0.356974
						Npdc1	0.0446926	0.261116			Tmem246	0.0436314	-0.309901
						Mapk14	0.0449007	-0.251779			AABR07003030.2	0.0443068	-0.299354
						Cxcl14	0.046693	0.273892			Nckap1	0.0444074	-0.314891
						Klrb1a	0.0468013	-0.278366			Slc16a1	0.044469	-0.375746
						Uqcrb.1	0.0470456	0.281027			Abcg3l3	0.0447186	-0.27187
						Cwc27	0.0472792	-0.269095			Adamts19	0.0448315	0.283712
						Tmod2	0.0492398	-0.279792			Mkln1	0.0455969	-0.260301
						Gdi1	0.0521081	0.257187			Dis3l2	0.0456371	-0.383744
						Nr2e1	0.0528377	-0.265092			Pcca	0.0462914	-0.358311
						Uqcrq	0.0528873	0.257197			Itfg1	0.0463372	-0.322219
						Spred1	0.0533294	-0.251094			Kmt5b	0.0471283	-0.352569
						Ctc1	0.0534405	-0.277721			Naa15	0.0475357	-0.322572
						Rarb	0.0535598	0.275916			Frem1	0.0485397	-0.314164
						Lsm1	0.0544484	0.347306			Zbtb47	0.049003	-0.291243
						Bcas2	0.0574578	0.262443			Plekha7	0.0498208	-0.360778
						AC096473.3	0.0575454	0.257556			Pcnt	0.0498471	-0.275847
						Bax	0.0576826	0.254458			Fam172a	0.0500545	-0.348314
						Ino80c	0.0583897	0.267086			Add2	0.0501882	-0.30003
						Ptov1	0.0588473	0.280925			Bmpr1b	0.0503931	-0.41395
						Rasa3	0.0589554	-0.257925			Klhl32	0.051659	-0.297556
						Top1	0.059249	-0.31574			C2cd5	0.0519488	-0.340711
						Srsf9	0.0598336	0.262372			Nipal2	0.0526098	-0.331755
						Nfkbia	0.0604533	0.253528			Gramd1b	0.0535363	-0.283269
						AABR07035539.1	0.0606588	0.263528			Exoc4	0.0540821	-0.3174
						Unc119	0.0611149	0.34899			Ogt	0.0541766	-0.271226
						Lpcat1	0.0612414	0.254112			Mipol1	0.0542961	-0.332142
						Nr4a3	0.0614932	0.285912			Tcf7l1	0.0543532	-0.36836
						Psma2	0.0634199	0.251809			Ldb1	0.0550438	-0.301638
						Fxyd7	0.0647377	0.331729			Snrnp27	0.0551722	-0.2651
						Hspa5	0.0648088	0.309155			Ranbp17	0.0552065	-0.382426
						Dph3	0.0660362	0.262813			Rb1	0.0552707	-0.344111
						Fbn2	0.0666367	0.27846			Rab11fip2	0.0553334	-0.315937
						Prpf19	0.0668779	0.295392			Stxbp5l	0.0560405	-0.321696
						Dtd1	0.0671941	0.302661			Cdc42bpb	0.0572145	-0.316795
						Ubr5	0.0672405	-0.329856			Tsn	0.0573144	-0.340924
						Mrpl41	0.0697464	0.253315			Smarcd2	0.0579408	-0.296465
						LOC102553386	0.0699472	0.264786			RGD1560925	0.0580662	-0.629623
						Man1a2	0.0705359	0.254448			Zfr	0.0585949	-0.295091
						Abca1	0.0723299	-0.304286			Tmx4	0.0591152	-0.289551
						Eid1	0.0734431	0.257326			Atm	0.0605363	-0.311054
						Rab5c	0.0735423	0.30403			Necab3	0.0606322	-0.372487
						AABR07034315.1	0.0747063	0.264773			Atf7	0.0610201	-0.349755
						Sntg1	0.0755866	0.256289			Larp4b	0.0610546	-0.304492
						Slit2	0.0826136	-0.300727			Kpnb1	0.0612046	-0.307619
						Bin1	0.084308	0.261799			Mtss1	0.0614964	-0.335213
						LOC108349594	0.0853395	0.276531			Fxr1	0.063293	-0.286114
						Dnajb1	0.0882265	0.253857			Grid2	0.0637179	-0.414816
						Jagn1	0.0900415	0.252708			Xpo1	0.0639681	-0.348158
						Rassf4	0.0951623	0.282041			Cers5	0.0640623	-0.292793
						Zfp36l2	0.0970422	0.278523			Mmel1	0.0645333	-0.250583
						Psma7	0.10309	0.266609			Cd48	0.064925	-0.328609
						Arl3	0.104839	0.26443			Tanc1	0.0649523	-0.263254
						Lgalsl	0.10862	0.30905			Stt3a	0.0657067	-0.327844
						Ss18l2	0.114352	0.255906			Pibf1	0.0659883	-0.344526
						Mgat4b	0.115325	0.261506			P3h2	0.0666434	-0.316557
						Arl8a	0.118054	0.254916			Eefsec	0.0676372	-0.292211
						Rom1	0.12154	0.49572			Tymp	0.0680239	-0.293534
						Polr2c	0.124752	0.257011			Trim37	0.0691281	-0.295583
						Gmds	0.12829	-0.278205			Ecpas	0.0691826	-0.35978
						Arl2	0.137677	0.25616			Bmt2	0.0696945	-0.340987
						Vkorc1	0.140494	0.270144			Mllt10	0.0699312	-0.338423
						Sncb	0.144899	0.332876			Pacs1	0.0712859	-0.26552
						Trim26	0.152788	0.262612			Alms1	0.0732454	-0.310156
						Comt	0.160912	0.254514			Hdac9	0.0733446	-0.391894
						Pcna	0.161355	0.258784			Egfl6	0.0742792	-0.362522
						Cited2	0.173884	0.344689			Wdr78	0.0746157	-0.411581
						Homer1	0.179437	0.251206			Btaf1	0.075036	-0.366089
						Errfi1	0.180418	0.42607			Rev3l	0.0753218	-0.436865
						Ndufs8	0.188185	0.257488			Braf	0.076079	-0.325178
						Sqstm1	0.218277	0.266351			Stat5b	0.077021	-0.26902
						Nap1l4	0.223695	0.251804			Stim1	0.0774261	-0.255924
						Pdc	0.225709	0.599022			Fubp1	0.0774712	-0.303403
						Rcvrn	0.340274	0.368065			Hif1a	0.0775637	-0.281905
						Gngt1	0.454765	0.762335			Lpcat3	0.0778168	-0.302128
						Prkca	0.48453	0.322555			Sbf2	0.0779343	-0.300345
						Rassf1	0.504929	0.34747			RGD1565033	0.0781815	-0.258365
						S100a3	0.64234	0.268326			Enah	0.0784069	-0.302185
						Apoo	0.713066	-0.283782			Tut1	0.0787549	-0.283526
						Snap25	0.869311	0.29587			Ahi1	0.0788865	-0.285772
						Prss56	0.929304	0.584648			Acsl6	0.0789973	-0.32363
											Ubap2l	0.0794467	-0.387326
											NEWGENE-1582771	0.0800456	-0.265227
											Abi1	0.0806246	-0.319134
											Ints6	0.0822202	-0.259803
											Abraxas1	0.082813	-0.266848
											Unc5c	0.0829311	-0.356791
											Pc	0.0831074	-0.394997
											Akap10	0.0836485	-0.255073
											Sos2	0.0847345	-0.391926
											Sfi1	0.0848191	-0.281192
											Efhd1	0.0850298	-0.364113
											Dstyk	0.0851852	-0.284644
											Ppm1e	0.0862586	-0.327383
											Adnp	0.0863691	-0.301256
											Oxr1	0.0879768	-0.371556
											AABR07049085.1	0.0894742	-0.345181
											Map4k5	0.0929211	-0.309967
											Glcci1	0.0930572	-0.357839
											Orc5	0.093736	-0.261368
											Farp1	0.09429	-0.352881
											Cnot4	0.094871	-0.285132
											Usp6nl	0.0964053	-0.267847
											Kidins220	0.0984226	-0.268997
											Fxyd7	0.0989149	-0.320571
											Mdga2	0.101156	-0.34833
											Gtf3c3	0.102006	-0.257423
											Arnt	0.103326	-0.281668
											Pdzrn3	0.104246	-0.266655
											Yipf3	0.10465	-0.269416
											Map3k5	0.105148	-0.374475
											Dab1	0.106068	-0.294776
											Ube2g1	0.106609	-0.351363
											Smchd1	0.106963	-0.261726
											Micu2	0.107628	-0.307239
											Pds5b	0.110547	-0.287085
											Mbnl1	0.11099	-0.33426
											Ankh	0.111589	-0.261678
											Anxa1	0.111818	-0.357367
											R3hdm1	0.11226	-0.320105
											Usp47	0.112971	-0.260384
											Slc25a40	0.114589	-0.255453
											Pnn	0.115184	-0.29939
											Eml5	0.115542	-0.38476
											Vps13a	0.116365	-0.258964
											Dpp7	0.116609	-0.262223
											Acin1	0.116667	-0.326054
											Etnk1	0.117006	-0.25954
											Ick	0.117865	-0.280123
											AABR07041096.1	0.118409	-0.353379
											Bmpr2	0.120429	-0.258715
											Ppp1r12b	0.121189	-0.360665
											Smc5	0.1241	-0.2958
											Ephb2	0.125589	-0.361542
											Kdm2a	0.126545	-0.396732
											Srpk2	0.126832	-0.306413
											Stim2	0.128905	-0.287169
											Trip12	0.131269	-0.323928
											Nsmce2	0.131571	-0.289979
											Mgat5	0.131684	-0.342593
											Rnpc3	0.133392	-0.333979
											Spns1	0.134761	-0.252223
											Ddx10	0.135202	-0.25037
											Zfp407	0.135988	-0.28982
											Ccdc62	0.136655	-0.265222
											Atp9b	0.137188	-0.258741
											Arfgef1	0.137297	-0.314539
											Pcsk5	0.137998	-0.318177
											Iqcg	0.139791	-0.283287
											Ublcp1	0.141407	-0.28151
											Dip2c	0.142895	-0.319171
											Efr3b	0.143324	-0.393094
											Stk10	0.14398	-0.292532
											Rasa2	0.144043	-0.306818
											Gin1	0.148853	-0.255433
											Ssr1	0.148915	-0.285977
											Ift140	0.153524	-0.266214
											Col4a3bp	0.153712	-0.326244
											Prkch	0.154684	-0.275218
											Zfp638	0.155086	-0.323772
											Fbxl17	0.156456	-0.257406
											LOC108349594	0.157194	-0.263877
											Ltbp1	0.157353	-0.387757
											Psmc2	0.158109	-0.257787
											Plekha5	0.159628	-0.298419
											Rasa4	0.159824	-0.254453
											Fstl4	0.160242	-0.292549
											Mtss1l	0.160637	-0.332488
											Rho	0.163328	-0.385917
											Ston2	0.163412	-0.301742
											Arrb1	0.163442	-0.26424
											Mrps35	0.163911	-0.270616
											Ptprg	0.164537	-0.299691
											Entpd2	0.166085	-0.338062
											Rai14	0.168296	-0.320484
											Adam10	0.168426	-0.327392
											Dhrs3	0.168699	-0.313824
											Sema4a	0.169522	-0.327449
											Gab1	0.170967	-0.353216
											Unc50	0.173381	-0.325393
											Mysm1	0.173568	-0.287943
											Vps9d1	0.173613	-0.347123
											Rgs7	0.176472	-0.307471
											Slc25a36	0.179505	-0.257533
											Scaf4	0.180561	-0.341866
											Ddx6	0.18088	-0.310244
											Mettl15	0.18269	-0.258051
											Zfp207	0.184618	-0.259902
											Pias2	0.184735	-0.282629
											Olfml3	0.185177	-0.309598
											Stk3	0.18593	-0.30799
											LOC679894	0.186632	-0.251419
											Guca1a	0.189378	-0.52891
											Ntn4	0.189843	-0.364559
											Cyp7b1	0.189875	-0.371679
											Tbc1d19	0.192058	-0.307592
											Hacd3	0.193572	-0.312662
											Ttyh3	0.193742	-0.300779
											Unc13b	0.193892	-0.345748
											Ythdf3	0.196829	-0.283333
											Armc2	0.197446	-0.286608
											AABR07068650.1	0.19796	-0.318574
											Fgd4	0.207231	-0.267214
											Rabgap1l	0.20834	-0.283063
											Faf1	0.211258	-0.313494
											Hlcs	0.213051	-0.273472
											Sycp1	0.213081	-0.273881
											Lin7a	0.21369	-0.271007
											Ist1	0.22016	-0.256528
											AC095390.2	0.222949	-0.304938
											Luc7l	0.225099	-0.292017
											Crim1	0.227362	-0.277166
											Pdzd2	0.227684	-0.265758
											Nbas	0.228893	-0.296267
											Snx10	0.229206	-0.310034
											Tdp2	0.229742	-0.270329
											Dnajc15	0.231227	-0.297709
											Slc30a10	0.233995	-0.26013
											Vps37b	0.23441	-0.277568
											Wdr20	0.234645	-0.272476
											Dcp1a	0.234755	-0.307553
											Stxbp5	0.234895	-0.26549
											Eda	0.240273	-0.273616
											Abca1	0.241411	-0.279781
											Scmh1	0.243613	-0.301106
											Prpf3	0.245601	-0.270042
											Cyp4f6	0.245963	-0.284254
											Trpc4ap	0.246581	-0.266317
											Lrrc58	0.248472	-0.340484
											Gnaq	0.251054	-0.325777
											Pbrm1	0.252167	-0.392278
											Apoo	0.252361	-0.272382
											Ube4a	0.252993	-0.284452
											Gpatch1	0.255801	-0.268825
											Tmem87b	0.256862	-0.282621
											Arhgef11	0.257081	-0.318104
											Ephb1	0.257695	-0.257809
											AABR07017145.1	0.261022	-0.284592
											Pan3	0.264343	-0.268459
											AABR07033882.1	0.270136	-0.371988
											Ints8	0.271398	-0.308749
											Srgap2	0.272388	-0.290172
											Msrb3	0.273384	-0.284996
											Pdss2	0.276603	-0.264168
											Gpx8	0.277868	-0.286764
											Pdgfc	0.282283	-0.26207
											Zdhhc20	0.282379	-0.288456
											Rufy3	0.28546	-0.287023
											Clpx	0.290416	-0.287
											Ttc14	0.292172	-0.296924
											Vcl	0.292827	-0.319312
											Ahctf1	0.296141	-0.270739
											Dnaja1	0.297901	-0.438703
											Fbxl4	0.301266	-0.279277
											Slc35a5	0.30416	-0.287084
											Sclt1	0.31649	-0.296828
											Hdac8	0.319044	-0.343726
											Cab39l	0.321888	-0.250527
											Sema3f	0.342484	-0.254078
											Zfp692	0.345856	-0.26313
											Cbfa2t2	0.345954	-0.342641
											Gngt1	0.346266	-0.428319
											Slc9a9	0.353536	-0.289767
											Cadps	0.357875	-0.262706
											Washc2c	0.358314	-0.250906
											Fam214a	0.360883	-0.271323
											Pld5	0.362571	-0.286529
											Oga	0.362965	-0.271729
											Scfd2	0.364681	-0.265839
											Rnls	0.368523	-0.322119
											Dennd1b	0.37025	-0.29247
											Herc4	0.379999	-0.320075
											Hist1h1e	0.381439	-0.27892
											Hsph1	0.381951	-0.293169
											Capn7	0.38443	-0.285246
											Tet2	0.385076	-0.261669
											Nfyc	0.387193	-0.25622
											Dcaf10	0.387572	-0.273047
											Ulk2	0.388493	-0.255256
											Lnpk	0.392593	-0.251683
											Plekhh2	0.39539	-0.272356
											LOC100910506	0.398681	-0.285837
											Nfatc3	0.401375	-0.286739
											St7l	0.403159	-0.260367
											Dip2b	0.403225	-0.25357
											Map3k2	0.404293	-0.301665
											LOC100174910	0.405281	-0.286661
											Stau1	0.419762	-0.319725
											Tm9sf3	0.432494	-0.264093
											Zrsr2	0.444289	-0.275727
											Cops2	0.449195	-0.26569
											Gbe1	0.460153	-0.251239
											Cited2	0.461863	0.25071
											Frs2	0.473843	-0.292976
											Atxn2	0.480311	-0.272555
											Chd9	0.481593	-0.254319
											Grk4	0.489656	-0.27444
											Dnm1l	0.498405	-0.274097
											Dmtf1	0.499943	-0.282818
											Cc2d2a	0.504662	-0.283846
											Cd200	0.505116	-0.265199
											Sntb2	0.511998	-0.281178
											Pxn	0.512196	-0.279661
											Ski	0.520958	-0.275978
											Hlf	0.522863	-0.252366
											Maged2	0.523992	-0.251504
											Rnf216	0.535883	-0.276681
											Pik3c2a	0.541394	-0.25571
											Plod2	0.542598	-0.264086
											Prkacb	0.550756	-0.272035
											Hcn1	0.551402	-0.457943
											Tbc1d31	0.569675	-0.252885
											Col18a1	0.577538	-0.271127
											Zfp532	0.577959	-0.262337
											Hmg20a	0.579168	-0.253841
											Pdc	0.581105	-0.593294
											Ermard	0.581477	-0.253758
											Asxl1	0.584786	-0.255715
											Exoc2	0.595146	-0.260805
											Tfdp2	0.600175	-0.275555
											Abhd12	0.61523	-0.257782
											Ranbp2	0.619364	-0.279044
											Dpf3	0.62155	-0.2535
											Bbs7	0.635772	-0.284495
											Dennd4c	0.635792	-0.284063
											Spata7	0.641457	-0.27324
											Kpna4	0.645771	-0.265173
											Slain2	0.656408	-0.270697
											Dnajc1	0.656443	-0.272304
											2024-03-06	0.664222	-0.291997
											Gucy1a2	0.666523	-0.279789
											Abl2	0.667416	-0.290918
											Rprd1a	0.679877	-0.263312
											Zmat1	0.686595	-0.254555
											Arhgap17	0.688308	-0.259614
											Srf	0.700497	-0.252743
											Uggt1	0.70595	-0.250894
											Atp1a2	0.716265	-0.261116
											Dido1	0.717374	-0.257928
											Sag	0.731628	-0.513581
											Fam76a	0.748863	-0.286146
											Smg7	0.804673	-0.288806
											Tsc22d2	0.841857	-0.269871
											Tcf7l2	0.853404	-0.275196
											Cgrrf1	0.888156	-0.282622
											Gnb1	0.935594	-0.415263
											Plekhg1	0.943845	-0.257498
											Kalrn	0.971484	-0.285413
											AABR07037451.2	0.974332	-0.326375
											Pcp4	0.989915	-0.388013

## Sheet: A17 (cluster 16)
1M STZ vs Ctrl		p_val	avg_log2FC		2M STZ vs Ctrl		p_val	avg_log2FC		3M STZ vs Ctrl		p_val	avg_log2FC
	B2m	1.25394e-18	3.28183			Cdh13	9.55797e-14	-0.692615			B2m	9.28041e-26	3.1438
	Ifi27l2b	3.78937e-06	2.1092			Mt-co3	2.03405e-10	-1.08424			RT1-A1	6.77928e-22	2.40113
	Isg15	6.40921e-06	2.01031			Mt-atp6	5.49922e-10	-0.785279			Mt-nd4	9.20357e-20	-0.794361
	RT1-A1	1.47452e-18	1.69838			AABR07044900.1	8.61714e-10	-0.449239			Cox6b1	7.10451e-19	-0.9347
	Akap12	1.50441e-14	1.68022			Mt-nd1	3.54648e-09	-0.887161			Vgf	1.16244e-18	-1.09755
	Stat4	2.14492e-15	1.56754			Tfap2e	4.6075e-09	-0.270941			AC134224.3	1.83129e-17	0.466897
	LOC100364435	1.13806e-17	1.50922			Mt-co1	5.20729e-09	-0.546028			Stat4	4.39978e-17	1.53749
	Mx2	1.92673e-06	1.28544			Clcn7	1.28712e-08	-0.311227			Atp5f1e	4.95937e-17	-0.868555
	RT1-CE10	4.44698e-09	1.2699			Zfp575	2.19388e-08	-0.420298			Mt-atp6	7.53171e-17	-0.704132
	Nnat	6.73174e-13	1.25976			Thsd7b	2.76954e-08	-1.47001			Gng3	4.09675e-16	-0.758953
	Oasl2	1.62341e-07	1.21804			Gpld1	3.53674e-08	-0.365053			Mt-co2	7.86217e-16	-0.377104
	Crabp1	1.68827e-11	1.21288			Clu	4.39171e-08	-0.948779			Pgam1	3.02566e-15	-0.658746
	Cnbd1	2.64802e-10	1.19754			Mt-nd4	7.98196e-08	-0.630161			Aldoa	4.12406e-15	-0.57803
	S100a3	0.000113175	1.07327			Xpo1	5.02632e-07	-0.405487			Mt-co3	6.98663e-15	-0.561795
	Tap1	2.37777e-08	1.03287			Hk2	7.53577e-07	-0.288841			AABR07000398.1	7.51525e-15	-0.876381
	Gadd45g	4.15176e-07	1.02455			Nt5dc3	1.02462e-06	-0.345583			Cox8a	2.04647e-14	-0.625334
	Lgals3bp	4.25052e-10	0.985867			Mt-cyb	1.78419e-06	-0.398495			AABR07025010.1	4.98554e-14	-0.811753
	Ly6h	6.93194e-11	0.970857			Vgf	1.89287e-06	-1.09587			Mt-cyb	6.77149e-14	-0.405033
	Fos	6.84729e-08	0.954986			Cntnap1	2.22985e-06	-0.303263			Ppia	4.1042e-13	-0.890008
	Ifi27	0.00111851	0.954037			Slc27a1	4.24543e-06	-0.290892			Psmb9	5.20788e-13	1.2611
	Stat3	8.99759e-10	0.905961			Fam222a	4.58352e-06	-0.250095			Atp6v1f	5.84554e-13	-0.692858
	Zcchc12	2.10531e-09	0.895463			Mt-nd2	5.50503e-06	-0.563077			Ndufa4	9.5746e-13	-0.566739
	Stat2	1.93822e-05	0.887922			Pde10a	5.83848e-06	-0.756943			Cox7a2	1.19233e-12	-0.710898
	Psmb9	1.62341e-07	0.885011			Rcor1	9.05937e-06	-0.396016			Slc6a11	3.03036e-12	-0.832512
	Igtp	4.26326e-07	0.875276			Rnf215	9.31515e-06	-0.33093			Mt-nd1	1.19855e-11	-0.373354
	Eif2ak2	1.63437e-06	0.859697			Asic1	9.53016e-06	-0.419422			LOC103693430	1.94293e-11	-0.633769
	Mx1	0.00011803	0.799181			Hsd17b7	1.06104e-05	-0.330887			Zcchc12	2.59908e-11	0.869407
	Jun	0.000114963	0.780179			Prkcsh	1.06534e-05	-0.834495			Atp5mg	2.60005e-11	-0.59993
	RT1-S3	3.02532e-07	0.760096			Rad1	1.26173e-05	-0.266888			Ly6h	3.60108e-11	0.790215
	Dhx58	3.98107e-07	0.756327			Calr	1.29934e-05	-1.06647			Cox7c	3.6232e-11	-0.612726
	Gabrg3	6.95094e-05	0.739679			Msi2	1.40445e-05	-0.702127			Tap1	3.64583e-11	1.09514
	Atf4	0.000226261	0.726479			Wipf2	1.58349e-05	-0.37568			Sncb	3.76785e-11	-0.53024
	Psme1	5.83249e-06	0.698892			RGD1562378.2	1.69941e-05	-0.291528			Snap25	3.83637e-11	-0.343978
	LOC100363469	2.13435e-07	0.695443			Rrbp1	1.71242e-05	-0.577604			Rps29	6.34576e-11	-0.64944
	Cox6a2	0.00481558	0.694566			Agfg2	1.87524e-05	-0.326591			RT1-S3	6.56705e-11	1.52264
	RT1-M3-1	1.51405e-05	0.681378			Mvd	2.22801e-05	-0.564886			Cox7b	7.0303e-11	-0.640513
	Fstl4	0.000164869	0.670879			Tram1	2.57282e-05	-0.636279			Irf1	8.15547e-11	0.894142
	Gsta4	1.07738e-07	0.667895			AABR07052897.2	3.06979e-05	-0.335575			Mx2	8.15547e-11	1.92896
	Adcy2	8.72773e-07	0.665895			Ccdc43	3.36558e-05	-0.251267			Nlrc5	8.15547e-11	0.733251
	Jund	3.77012e-07	0.664203			Rnf152	3.8843e-05	-0.257426			Rps11	9.71948e-11	-0.667262
	Psd3	7.9844e-06	0.652035			Lamb1	4.35934e-05	-0.533206			Igtp	1.06278e-10	1.33952
	Junb	0.00104969	0.648858			Ttc39b	4.69655e-05	-0.358672			Samd9	1.22597e-10	1.19528
	LOC100363452	3.47882e-06	0.642239			Dpysl4	5.55804e-05	0.75392			Akap12	1.87301e-10	1.33317
	Herc6	3.73516e-05	0.630652			Golph3	5.64291e-05	-0.397902			C1ql2	2.11453e-10	-0.52346
	Dgkb	0.00240153	0.623836			H3f3a	5.77779e-05	0.505678			Ifi47	2.15371e-10	1.0842
	Oas1f	0.000112808	0.611708			Idi1	6.33523e-05	-0.741462			App	2.3628e-10	0.566921
	Cnp	2.00113e-07	0.609638			Fth1	6.86928e-05	0.539215			Nnat	2.45947e-10	1.37342
	Tmem140	0.000140288	0.602055			Tmem87a	7.03265e-05	-0.291825			Mt-nd2	2.5286e-10	-0.430605
	Ifi47	3.73516e-05	0.596109			Atp11a	7.29443e-05	-0.34578			Uqcr10	3.41367e-10	-0.654802
	Apol9a	3.73516e-05	0.593663			Hmgcs1	7.72077e-05	-0.757794			Herc6	3.48335e-10	1.26801
	Yars	1.22039e-05	0.589198			Tab1	7.95803e-05	-0.362364			Usp18	3.48335e-10	1.06685
	RT1-CE1	1.04458e-05	0.58901			Hsd17b4	8.06055e-05	-0.527679			Ifi27l2b	4.70661e-10	2.55778
	Nkain2	0.000290823	0.585446			Prkar1b	8.3995e-05	-0.304782			Cox4i1	4.83973e-10	-0.43513
	Luzp2	0.00095292	0.585009			Entpd3	8.90688e-05	-0.368118			Mrps35	5.34058e-10	-0.558591
	Rd3l	0.0195033	0.583763			Pcyox1l	9.02133e-05	-0.31018			AABR07025140.1	5.61615e-10	1.18724
	Ubc	6.96182e-07	0.581808			Palmd	9.14857e-05	-0.521606			Ndufa2	6.62814e-10	-0.642394
	Usp18	0.00015677	0.578998			Cep63	9.35937e-05	-0.360814			RT1-CE10	9.30265e-10	1.23881
	Zfp385d	0.000138363	0.578424			Tgfbr3	0.000109452	-0.281448			Ldha	9.61089e-10	-0.603238
	Cttnbp2	4.39041e-05	0.570613			Uqcc1	0.000112366	-0.388044			LOC100364435	1.07234e-09	0.780147
	Slc3a2	0.00103065	0.566799			Cenpv	0.000112733	-0.317159			LOC100360522	1.31375e-09	-0.698821
	AABR07019341.1	2.61604e-05	0.565876			LOC100364435	0.000118298	0.983793			AABR07059663.1	1.35389e-09	1.06589
	Rps13	4.992e-05	0.558303			Abcc4	0.000125336	-0.485709			Isg15	1.4464e-09	2.90358
	Egr1	1.04742e-06	0.55356			Cmtm4	0.00012743	-0.26252			Mx1	1.4464e-09	1.87271
	AABR07040864.1	0.00718302	0.549418			Gga3	0.000140406	-0.457569			Aldoc	1.58453e-09	-0.469243
	Ddit3	0.00230586	0.546377			Tmsb4x	0.000150777	0.417282			Lgals3bp	1.7291e-09	1.00673
	S100a1	9.63952e-07	0.544237			Fam8a1	0.000152078	-0.319875			Capn13	1.82025e-09	-0.63595
	Rps10l1	2.56311e-06	0.542836			Zfp385c	0.000162933	-0.502547			Cox5b	1.91806e-09	-0.54352
	Rps15	4.07882e-05	0.542762			LOC108348078.1	0.00017112	-0.279922			Tomm7	1.93025e-09	-0.601092
	Ybx1-ps3	0.000578005	0.536443			Nhlrc2	0.000177263	-0.298223			Atp5mc1	1.98935e-09	-0.558111
	Sesn2	0.0223615	0.534099			Ttc39c	0.000185593	-0.303457			LOC100360841	2.03117e-09	-0.597663
	Ube2l6	0.000536907	0.53106			Kcnab2	0.000203668	-0.460306			Tmem270	2.31059e-09	0.856077
	Neto1	0.00502249	0.528988			AABR07044049.1	0.000207228	-0.350997			Uqcrq	2.35344e-09	-0.604216
	AABR07025140.1	6.65505e-05	0.527268			Gfod1	0.00023267	-0.689963			Eef1a2	2.59509e-09	-0.6307
	Cmpk2	0.000705327	0.5226			Scd2	0.000241736	-0.704737			Uqcrh	2.74972e-09	-0.567966
	Nlgn1	0.000354822	0.520937			Slc7a5	0.000265797	-0.431396			Parp9	2.87971e-09	0.797434
	LOC100360841	1.61827e-05	0.520195			Lgals8	0.000269822	-0.351437			Trim21	2.95389e-09	0.717135
	LOC103689961	2.73737e-05	0.519551			LOC108348172	0.000282106	0.829465			H3f3a	7.23232e-09	0.322802
	AABR07059663.1	6.65505e-05	0.518272			P4hb	0.000282338	-0.487139			Slc25a4	8.02286e-09	-0.439721
	Hs2st1	0.000332549	0.511044			Rps6kc1	0.000283377	-0.48334			Oasl2	9.35318e-09	1.45744
	AABR07000398.1	1.14369e-05	0.510958			Fstl4	0.000293914	-0.74267			Enc1	1.01739e-08	-0.555257
	Rpl37	2.76729e-05	0.506823			Asap1	0.000304044	-0.306609			Atp5mf	1.08187e-08	-0.619031
	Trim21	4.50895e-05	0.504964			Ust	0.000304416	-0.378878			Mt-nd4l	1.22999e-08	-0.538493
	Rpl23	2.00032e-05	0.504033			Creld2	0.0003067	-0.294439			Apol9a	1.46053e-08	0.808088
	Lyrm4	0.000319258	0.50011			Crtc1	0.000319807	-0.315725			Park7	1.69573e-08	-0.456996
	Cebpb	0.00494187	0.500015			Gnb5	0.000332382	-0.255452			Myl6	1.81013e-08	-0.588303
	RGD1562402	6.4818e-05	0.499735			Rhobtb2	0.000338644	-0.512909			Grm2	1.94588e-08	-0.549896
	C1ql1	2.1304e-08	0.499488			Dkk3	0.000353517	-0.531301			Ndufc2	2.35644e-08	-0.454338
	AC128960.1	1.88421e-05	0.498681			Herpud2	0.000353579	-0.355513			Rpl41	2.52384e-08	-0.444863
	Irf1	2.18589e-06	0.497391			Itch	0.000373774	-0.358849			Ckb	2.56527e-08	-0.38464
	Samhd1	2.19733e-05	0.494865			Tbl2	0.000374739	-0.348841			Clvs1	2.82024e-08	-0.769333
	Nfrkb	8.66997e-05	0.493606			Isyna1	0.000395014	-0.310122			Stat2	3.74882e-08	1.1919
	Tacc1	0.00146589	0.493535			Serinc1	0.000402109	-0.297144			Gprc5b	4.14922e-08	-0.567559
	AABR07042936.1	0.00137796	0.491382			Pgm3	0.000407294	-0.271798			LOC108351137	5.54027e-08	-0.476584
	Prpf4b	0.00129081	0.491113			Cav2	0.000425501	-0.256898			LOC100910979.1	5.64806e-08	0.846247
	Ppp3ca	0.00028053	0.490985			AC141169.2	0.000434605	-0.394703			Mt-nd3	6.29308e-08	-0.706866
	Tubb3	0.000135981	0.490486			Anp32a	0.000435126	-0.402524			Dynll1	6.3381e-08	-0.498481
	Epha3	0.0213946	0.489912			Mt-co2	0.000436492	-0.305458			Oas1f	6.44494e-08	0.7052
	Pea15	8.40679e-05	0.488498			Cnpy2	0.00044174	-0.421918			AABR07033882.1	7.13127e-08	0.999296
	Samd9	0.00011803	0.486424			Tmem181	0.000464977	-0.269207			Ubl5	7.8696e-08	-0.555312
	Fbxo2	0.000331917	0.484883			Prkaa1	0.000464977	-0.289977			LOC687780	8.96956e-08	-0.502053
	Sphkap	3.50873e-05	0.483872			Pip4k2c	0.000485734	-0.343694			Xaf1	1.21737e-07	0.702287
	Pak3	0.000222806	0.482886			Creb3l1	0.000489869	-0.267683			Rnf213	1.26895e-07	0.73614
	Rpl27a	0.000328324	0.482775			Jade3	0.000489869	-0.386772			Dtx3l	1.37223e-07	0.520881
	LOC100910979.1	0.00112204	0.482599			Ksr1	0.000498957	-0.500836			Ube2l6	1.94354e-07	0.761976
	Zfand5	0.00029948	0.482336			Fuz	0.000499807	-0.352964			Parp14	2.13019e-07	0.575286
	Dpysl4	2.6078e-05	0.482303			Chgb	0.000499963	-0.535197			Jun	2.64063e-07	1.10993
	Nlrc5	1.92673e-06	0.481069			Pkm	0.000501499	-0.351551			AC141489.1	2.78505e-07	-0.534745
	Caln1	0.00830742	0.48079			Gramd1b	0.000514735	-0.368908			Ndufs5	3.00049e-07	-0.523764
	Cd59	0.000245414	0.479613			Ldlr	0.000530265	-0.409226			Stat3	3.72246e-07	0.683462
	Cdh12	0.00111582	0.478104			Fem1a	0.000577465	-0.294255			LOC108348144	3.93335e-07	-0.517545
	Stmn4	0.000499801	0.476193			Manf	0.000580153	-0.912674			Ndufb2	4.20102e-07	-0.510562
	Rps27a	0.000270208	0.473449			Spata2L	0.000583553	-0.279598			LOC100911713	4.75969e-07	-0.556944
	Chrnb3	0.000970274	0.472648			Brpf3	0.000583553	-0.254586			Gabra1	5.48049e-07	-0.38638
	Fosb	0.0523223	0.471607			Vps13a	0.000601947	-0.449275			Cops9	5.50083e-07	-0.506194
	Pir	0.000404538	0.471417			Aff1	0.000655441	-0.3743			Pex11a	5.75066e-07	-0.538617
	AC094217.1	1.41912e-05	0.470471			Prr14l	0.000702766	-0.349272			Dhx58	5.99935e-07	0.896633
	Purb	2.57658e-05	0.469816			Snca	0.000715353	-0.558636			Shisa5	7.69381e-07	0.782673
	Stmn2	0.00118542	0.46891			Rpl17	0.000726378	-0.622544			Pgls	7.72353e-07	-0.527438
	Scrg1	5.33896e-05	0.466423			Zswim3	0.00077229	-0.34226			Cnp	1.18721e-06	0.676081
	AABR07044362.4	0.00090091	0.465431			Ddx18	0.00077947	-0.271244			Tnr	1.32535e-06	0.738484
	Rpl17	6.53979e-05	0.465072			Supv3l1	0.000785399	-0.278563			Ndufa7	1.33161e-06	-0.506442
	2022-03-02	0.000679195	0.463503			Ophn1	0.00078623	-0.431578			Sh3bgrl3	1.33615e-06	-0.514511
	Vps39	0.00186067	0.460971			Tmem67	0.000787029	-0.360689			S100a4	1.45975e-06	0.663006
	Kcnj3	0.146766	0.459615			Hsdl2	0.000802231	-0.265115			Cacna1d	1.46575e-06	-0.361344
	Mtch1	4.17819e-05	0.455157			Wiz	0.000828508	-0.33722			Eno1	1.47664e-06	-0.482694
	RGD1305733	0.000179849	0.4529			Plk2	0.000872079	-0.2719			Tmem140	1.55617e-06	0.626732
	AABR07068955.1	8.22424e-05	0.452089			Rps6kl1	0.000874249	-0.33826			Atp5pf	1.56908e-06	-0.511106
	Rpsa	0.000263888	0.451818			Slc6a11	0.000908535	-0.600755			Uba7	1.84641e-06	0.439604
	Nck2	4.74447e-05	0.445861			Dnajc27	0.000925625	-0.389063			Rpl35	1.97839e-06	-0.44839
	Comtd1	6.76708e-05	0.443527			Ranbp3	0.000949161	-0.325788			Hpcal4	2.07933e-06	-0.47708
	S100a4	0.0100812	0.443182			LOC498154	0.000970417	-0.290956			LOC100910506	2.33394e-06	0.750235
	AC132539.1	0.0112723	0.442461			Nudt16	0.00101627	-0.252894			Prdx2	2.62636e-06	-0.378775
	Farp1	0.00059381	0.441732			Basp1	0.00101951	0.422364			Atp5pd	2.79431e-06	-0.409201
	Rerg	5.41204e-05	0.439574			Cabin1	0.0010251	-0.265083			Irgm	2.82247e-06	0.415463
	Csrp2	7.21992e-05	0.439172			Hsp90b1	0.00105475	-0.797637			Tmem256	2.86327e-06	-0.511652
	Sema3e	0.00474623	0.437995			Fkbp2	0.0010621	-0.401029			Trafd1	3.28669e-06	0.654255
	Hpca	0.00190624	0.437455			Exoc5	0.00109125	-0.305743			Cplx3	3.34258e-06	-0.399248
	LOC100361934	0.000564449	0.437093			AABR07019086.1	0.00111915	-0.258835			Ppp3ca	4.03862e-06	0.652234
	Eef2	0.000714865	0.436754			Zc3h7a	0.00114342	-0.370896			RGD1309362	4.30413e-06	0.655111
	Rps8	0.000481183	0.436424			Lamc3	0.00117397	-0.530887			Uqcr11	4.84775e-06	-0.420118
	Tmem270	6.65505e-05	0.434658			Bdh1	0.00120436	-0.361617			Snrnp70	4.95899e-06	0.46883
	Sumo1	0.000194036	0.43167			Gprasp2	0.00122446	-0.444544			Gad1	4.99376e-06	-0.313822
	Dusp26	0.00544333	0.428248			AC095390.2	0.00125034	-0.336388			Pgk1	5.05403e-06	-0.388954
	Fndc3a	0.0228473	0.427673			Mtmr4	0.00125158	-0.278294			Ndufa5	6.10706e-06	-0.505811
	Slc4a5	0.000459789	0.427604			Creb3l2	0.00128801	-0.3413			Chn2	6.30237e-06	-0.306627
	Nars	0.0332092	0.427414			Tulp4	0.00135914	-0.368125			Nedd8	6.42137e-06	-0.373532
	Cd274	0.00125939	0.427245			Fmod	0.0013679	-0.477882			Cox6c	6.49031e-06	-0.374689
	Rbm3	0.00133104	0.426306			Spcs3	0.00139241	-0.354859			Rerg	6.53302e-06	0.67212
	LOC100360573	0.000216472	0.424959			Kpna5	0.001421	-0.28608			Serping1	6.54811e-06	0.451856
	Parp12	0.0015074	0.42255			Npat	0.00143496	-0.356169			Dbp	7.07285e-06	-0.417361
	Psma7	0.000594464	0.422011			Nrg1	0.00145908	-0.494195			Rab3a	7.94321e-06	-0.346043
	AABR07033882.1	0.0900468	0.42176			Gpr158	0.00146733	-0.437577			Cltc	8.08398e-06	-0.407405
	Nt5c3a	0.000330484	0.42147			Pi4kb	0.00148481	-0.331628			Adcy2	8.15772e-06	0.577475
	Elob	0.000140576	0.419453			Atp2a2	0.00151619	-0.590792			LOC100362149	9.58798e-06	-0.386626
	Rnd3	0.000235297	0.418199			Mt-nd3	0.00153458	-0.499146			Atp1a3	9.99838e-06	-0.381463
	Slamf7	0.00227385	0.416991			Sipa1l3	0.00155883	-0.562294			C1s	1.02289e-05	0.455072
	RGD1308428	0.0305756	0.416546			Mtch1	0.00158717	0.567637			Dpysl4	1.10045e-05	0.435932
	Dctn2	0.000135918	0.416336			Bcl9	0.00158772	-0.253094			Chgb	1.18169e-05	-0.45487
	Rnf187	0.000369977	0.4136			Sdf2l1	0.00159337	-0.688577			Cntn3	1.35806e-05	0.955356
	Gpr158	0.0129982	0.410738			Psen2	0.00164108	-0.318115			Bex2	1.38129e-05	-0.393323
	LOC108348287	1.79694e-05	0.410722			Cgn	0.0016418	-0.265055			Sec61g	1.38373e-05	-0.332257
	Rtp4	0.00011803	0.410531			Rps16	0.0016688	0.65676			Stmn4	1.45454e-05	0.606819
	Parp9	1.15938e-05	0.409963			Acta1	0.00170335	-0.261517			Thrsp	1.50454e-05	-0.265662
	Eif5a	0.000361249	0.409894			Fasn	0.00171222	-0.557301			Tenm4	1.5517e-05	-0.427222
	Necab2	0.0162096	0.409868			Cep120	0.00176002	-0.322603			Acyp2	1.62306e-05	-0.48488
	Mt-nd4l	0.000392339	0.405649			Cd320	0.00180939	-0.337276			Atp5me	1.63503e-05	-0.402108
	Prnp	3.0241e-05	0.405213			Pam	0.00185586	-0.436101			Nsg2	1.71102e-05	-0.481242
	Zfp608	0.0370302	0.4046			Arhgap26	0.0019399	-0.404652			S100a1	1.74146e-05	0.837708
	Reps2	0.000549593	0.403206			Rgs8	0.0019642	-0.579527			Fndc3a	1.78474e-05	0.713532
	AC134224.3	1.31141e-10	0.401318			Adam11	0.00198914	-0.389456			Trappc1	1.80422e-05	-0.417559
	LOC690468	0.000577109	0.399746			Vps13d	0.00200095	-0.448125			Ddt	1.82126e-05	-0.490229
	Asns	0.000243832	0.399742			Stmn1	0.00203429	0.719205			Ndufa11	1.84169e-05	-0.435939
	Rmnd1	0.0631677	0.399519			Tmem87b	0.00213268	-0.552788			Ndufb8	1.87649e-05	-0.388438
	Atp5if1	6.77465e-05	0.398376			Rhbdl3	0.00214764	-0.535653			Parp12	2.02762e-05	0.519516
	Pdia6	0.0971652	0.398283			Snd1	0.00214795	-0.475639			Akr1a1	2.03811e-05	-0.37361
	Tubb2b	0.000938076	0.39783			Sptlc2	0.0021533	-0.295937			Cend1	2.15889e-05	-0.458017
	Ktn1	0.00842541	0.397782			Dlgap1	0.0022987	-0.357154			Spag7	2.16398e-05	-0.440311
	Lmo4	0.000178048	0.397315			Acad9	0.00238927	-0.358727			Mab21l1	2.45281e-05	-0.451593
	Abracl	0.000820991	0.397163			Fos	0.0024231	-0.349704			Eif4a2	2.58356e-05	-0.461694
	Ranbp17	0.00121823	0.396678			Pex2	0.0024402	-0.46857			Rasa4	2.61466e-05	0.603451
	Tspyl1	0.00296561	0.396631			Ephb2	0.00248245	-0.349381			Asna1	2.75731e-05	-0.458581
	Arrb1	0.00152202	0.396017			Kat6a	0.00249392	-0.416037			Nptx1	2.82138e-05	-0.471509
	Lgals1	0.0120165	0.39522			Fbxo33	0.00265932	-0.279082			Hist3h2ba	3.06108e-05	-0.443826
	Ly6e	0.0275034	0.394394			Specc1	0.00271255	-0.42439			Pyurf	3.16427e-05	-0.346669
	LOC103693323	0.00153389	0.393892			Ly6h	0.00273198	0.845536			Prnp	3.27945e-05	0.384418
	Crbn	0.000920796	0.393501			Tbcel	0.00276293	-0.298792			RGD1562987	3.32981e-05	-0.313665
	Uba52	0.000111094	0.393465			Nppa	0.00276441	-0.739165			Cptp	3.40959e-05	-0.298883
	Nme2	0.00112981	0.393144			Cacna1a	0.00279069	-0.45293			Ifi35	3.42997e-05	0.303762
	LOC108349606	0.00149412	0.392411			Ubox5	0.00279624	-0.292116			Trim5	3.49848e-05	0.523812
	H3f3a	8.67958e-06	0.392035			Slc1a1	0.00285934	-0.529149			Tcte1	3.79658e-05	-0.309308
	Dut	0.00390201	0.391955			LOC100360522	0.00289942	-0.492552			Rnf114	3.9333e-05	0.581035
	Dtx3l	0.000208427	0.391605			Caln1	0.00296363	-0.550033			Atp5mc3	4.06261e-05	-0.378405
	Mxra7	0.00279957	0.391581			Trim9	0.00298248	-0.552113			Txn2	4.07551e-05	-0.398899
	Hdgfl3	0.00942483	0.390837			Fundc2	0.00299253	-0.285426			Gng2	4.12776e-05	-0.423691
	AC141489.1	0.000358861	0.39008			Msantd2	0.00304971	-0.387817			Nop10	4.4684e-05	-0.404797
	Sars	0.0177295	0.389793			Spred1	0.00307656	-0.379081			Pfdn1	4.98986e-05	-0.383813
	Limch1	0.0556878	0.388483			AABR07035946.1	0.0030978	-0.513706			Hpca	5.1217e-05	0.59182
	Ghitm	0.0352681	0.388313			Ctnnd2	0.00312302	-0.511306			Cstb	5.17309e-05	-0.385537
	Rpl10	0.00126615	0.387754			Asphd1	0.00321887	-0.325627			Gria3	5.24227e-05	0.673633
	Epha5	0.00137018	0.386308			Unc13b	0.00321887	-0.259999			Mxra7	5.24977e-05	0.432514
	Dynll2	0.000799365	0.385413			Mlst8	0.00328058	-0.279565			Atp6v0c	5.32984e-05	-0.279818
	Rbm46	0.0133018	0.383783			Pofut2	0.00328452	-0.263095			RT1-T24-4	5.38006e-05	0.348215
	Asrgl1	0.00252043	0.383576			Rif1	0.00347025	-0.312699			Arl4d	5.56586e-05	-0.428092
	Pard3	0.00994765	0.383157			Ppp1r16b	0.0035326	-0.345449			Tm7sf2	5.63543e-05	-0.358427
	Atp23	0.00487392	0.38254			Capn15	0.0035326	-0.304133			Prdx5	5.75743e-05	-0.391559
	Klf6	0.00474843	0.381874			RT1-A1	0.00355869	1.68911			Elavl4	6.03079e-05	-0.430612
	Gstm2	0.00527658	0.381271			Clta	0.0036407	0.437298			Zc3hav1	6.18688e-05	0.43456
	Fbxw7	0.00204902	0.381237			Lmo4	0.00364097	0.516518			Cox4i2	6.41832e-05	-0.382081
	Gria3	0.00137222	0.380964			Itpk1	0.0037741	-0.432609			Vopp1	6.48584e-05	-0.438044
	LOC103694169	0.00178452	0.38084			Egfr	0.00380299	-0.297613			Ndufb3	6.48674e-05	-0.370045
	Tbc1d32	0.00429255	0.379522			Coq8b	0.00384941	-0.285439			Mapkapk2	6.48749e-05	0.568916
	Tpd52l1	0.000850675	0.379311			AABR07021536.1	0.00391576	-0.43522			LOC100363502	6.81538e-05	-0.397216
	Rab26	0.00728135	0.379239			B2m	0.00402107	2.43667			Sod2	6.87797e-05	-0.378483
	Adss	0.00214871	0.377517			Rpsa	0.00422612	0.598579			Arhgap20	7.38733e-05	-0.340993
	Shtn1	0.00215648	0.376211			Tmem127	0.00423487	-0.275829			Bnip3	7.39314e-05	-0.418554
	Atf7ip	0.00096212	0.375229			Casc4	0.00427736	-0.440786			Hgf	7.95245e-05	0.349908
	Gstp1	0.0019508	0.374733			Dlst	0.00437521	-0.32512			Atp6v0d1	8.12518e-05	-0.318621
	Eid1	0.00133961	0.374251			Cldn12	0.00438737	-0.329587			Atp5mc2	8.25449e-05	-0.330727
	Fkbp1a	0.00627553	0.371138			Nsg2	0.00445922	-0.572931			Mrpl20	8.41941e-05	-0.369504
	Ift20	0.00337114	0.370872			Rps10l1	0.00451789	0.517373			AABR07021536.1	8.67707e-05	0.639614
	Eif2s2	0.0118436	0.370778			Vapa	0.0045181	0.447489			S100a13	8.74472e-05	0.574896
	Rnf6	0.00201097	0.369368			Sec61a1	0.00478787	-0.274207			Ifi27	8.96667e-05	0.740312
	Sp110	0.000642375	0.36891			2022-03-05	0.00481972	-0.326769			Uqcrb.1	9.18629e-05	-0.359169
	Nae1	0.000731066	0.367892			Fam126b	0.00482412	-0.374633			Yars	9.46203e-05	0.587204
	Ctsf	0.000581543	0.367831			Surf4	0.00488111	-0.279429			Atp6v1a	9.50435e-05	-0.356429
	Parp14	3.73516e-05	0.367711			Dnaja3	0.00489911	-0.303177			Elob	0.000100177	-0.366671
	Xaf1	0.000208427	0.367678			Faim2	0.00509309	-0.622725			Mat2a	0.000101164	-0.256482
	Pja1	0.00339046	0.367472			Srsf7	0.00519028	0.564611			Hacd3	0.000106647	-0.395871
	LOC100360117	0.00248047	0.366534			Ttc37	0.00520476	-0.267629			Tubb4a	0.000115536	-0.475665
	Rnf213	0.000262848	0.365987			Tubb2a	0.00520493	0.462301			Map1lc3a	0.000116026	-0.346083
	Etnk1	0.0134818	0.365397			Cxcl14	0.00525764	-0.466576			C1r	0.00011621	0.312955
	Ddah2	0.029863	0.364938			Insig1	0.00529246	-0.413419			AABR07025272.1	0.00011621	0.304767
	Dpagt1	0.0137716	0.364875			Tpp1	0.00557418	-0.450622			Tpi1	0.000120599	-0.416718
	Tmsb4x	0.000229991	0.364838			Qdpr	0.00592581	-0.383887			Mov10	0.000121745	0.311996
	Fig4	0.00396578	0.364347			Akap12	0.00606741	1.04799			Rsad2	0.000121745	0.380359
	Efhc2	0.00526459	0.364237			Rwdd4	0.00635142	-0.281681			Fam151b	0.000121825	-0.348189
	AABR07012054.1	0.000431639	0.36402			Psap	0.00640603	-0.399362			Atp1b2	0.000128712	-0.404167
	Eml6	0.00481432	0.362074			Agap1	0.00643281	-0.391866			RT1-CE1	0.000131096	0.333795
	Shisa5	0.00827605	0.361357			Dab1	0.0064586	-0.48455			Stmn3	0.000135187	-0.303394
	Snap91	0.00116244	0.360341			LOC297756	0.00647109	-0.323662			Ccdc12	0.000137846	-0.414823
	Pole4	0.0159811	0.358057			Ergic3	0.00651481	-0.257607			LOC690468	0.000139895	-0.422915
	LOC103693430	0.00530809	0.357582			Ece1	0.0065658	-0.407449			Nkain3	0.000142548	-0.297421
	Eps8	0.024388	0.356324			Schip1	0.00663768	-0.395029			Atp5f1b	0.000144893	-0.352637
	LOC100362027	0.00265359	0.356286			Arf2	0.00665915	-0.256408			Rpl19	0.000162987	-0.311923
	St5	0.00108012	0.354263			Dnajc3	0.00673059	-0.441533			Arhgap15	0.000164041	0.614506
	AABR07026997.1	0.00750736	0.353599			Canx	0.00676975	-0.483425			Rdh11	0.000164882	-0.263988
	Vgll4	0.00276693	0.353316			Acsl4	0.00678674	-0.269731			Trappc2l	0.000164997	-0.380206
	Trim44	0.00755606	0.353272			Smurf1	0.00682869	-0.42237			Dkk3	0.000169556	-0.474677
	Cmss1	0.00456991	0.35304			AABR07026125.1	0.00683553	-0.359108			Mrpl34	0.000169981	-0.326792
	Arl2	0.0183543	0.352847			Csnk1g1	0.00684574	-0.362981			AABR07036640.1	0.000173895	0.26804
	Sulf1	0.00689057	0.351308			Rpn1	0.00685818	-0.489063			Suclg1	0.000175382	-0.343052
	Stub1	0.000835338	0.350995			Ankrd10	0.00695489	-0.376865			Eef1e1	0.000176306	-0.332505
	Txnl4a	0.00079947	0.350344			Serp2	0.00698911	0.511274			Tma7	0.000178543	-0.310194
	Gng10	0.0072651	0.348556			Ltn1	0.00707377	-0.26239			Lrrc73	0.000182809	-0.343569
	Cdk2ap2	0.0391215	0.348183			Inpp5b	0.00714564	-0.328204			Cfl1	0.000189303	-0.293487
	Rec114	0.00030997	0.34747			Ago3	0.00714564	-0.332297			Idi1	0.000200028	-0.510353
	B3gat3	0.0104483	0.346968			Eepd1	0.00717257	-0.457236			Mrpl54	0.000202572	-0.343839
	Raly	0.00513308	0.34662			Tmem192	0.00723362	-0.26519			Tmed9	0.00021411	0.377439
	AABR07016141.1	0.00718844	0.346502			Mt-nd5	0.00725019	-0.403545			Qdpr	0.000219151	-0.325207
	Rps16	0.00224799	0.346171			Pdcd4	0.00728955	0.681251			Lrrtm4	0.000219752	0.745113
	Irgm	0.000366578	0.345552			AABR07006860.1	0.00735377	-0.351893			Aven	0.000230759	-0.314192
	Eif4h	0.0118862	0.345205			Snap25	0.00745487	-0.260037			Sec62	0.000236373	-0.313276
	AABR07072078.1	0.00162646	0.345186			Dlg3	0.00748791	-0.253152			Nap1l5	0.000240271	-0.324504
	Rpl37a	0.0199192	0.345182			Gsk3a	0.00760232	-0.354331			Lamb1	0.000243116	-0.333312
	Jpt1	0.00203007	0.344717			Chd8	0.00762692	-0.256338			Ifit2	0.000259774	0.385631
	Kif21a	0.0056077	0.344285			Ddhd2	0.00765844	-0.387984			Rnf19b	0.00026113	0.527663
	LOC100365839	0.00757096	0.343916			Epc2	0.00771063	-0.336147			Syt12	0.000272698	-0.312317
	Rps28	0.000708423	0.343004			Slc25a11	0.00778617	-0.410817			Romo1	0.000275943	-0.413133
	Aamp	0.0125899	0.342458			Hs3st2	0.00778691	-0.529106			Lgals9	0.00027659	0.395794
	Ptprs	0.00131731	0.342277			Rcn3	0.00781946	-0.282551			Atp5po	0.000286073	-0.342605
	Tcp1	0.00554785	0.341095			Btbd11	0.00793194	-0.389962			Egr1	0.000292056	0.462068
	Rnf19b	0.0053879	0.34091			Slc7a8	0.00797322	-0.284245			Glo1	0.00031204	-0.328602
	AABR07066379.1	0.013558	0.340372			Tbc1d5	0.00801181	-0.444			Adgrb3	0.000320079	0.705924
	Ndufb6	0.0076272	0.339721			Slc25a21	0.00806086	-0.290593			AABR07040864.1	0.000321289	-0.61704
	Gng2	0.0044471	0.339499			Gse1	0.00806086	-0.303245			Pfkl	0.000332241	-0.338722
	S100a13	0.00383617	0.339498			Hm13	0.00810917	-0.462696			Faim2	0.000346663	-0.292964
	Mageh1	0.00415864	0.339115			Lama4	0.00811479	-0.400277			Fos	0.000351133	0.561111
	Dnajb14	0.00147224	0.33862			Zbtb22	0.00816843	-0.319446			Arrb1	0.000352149	0.51219
	Crem	0.107477	0.338284			G3bp2	0.00820431	-0.281308			Nlgn1	0.00035262	0.63775
	Steap3	0.00528879	0.337775			Fcho2	0.00831266	-0.342479			Kdm4b	0.000379264	-0.277822
	RGD1311703	0.00175935	0.337567			Ccpg1	0.00832108	-0.300895			Ifih1	0.000387457	0.284026
	Wdr83os	0.00247703	0.337295			Kat6b	0.00835353	-0.35381			Pde7b	0.000394476	0.580285
	Rpl32.1	0.000745045	0.334665			Sorcs1	0.00841551	-0.52291			Cdkn1a	0.000398767	0.386238
	Vps37d	0.000683681	0.334588			Slc37a3	0.00855245	-0.266289			Nppa	0.000404589	-0.547405
	Cbln1	0.00694827	0.334216			Ppargc1b	0.00859838	-0.369989			Ddx58	0.000410632	0.265117
	Ncl	0.00376153	0.334127			Rplp0	0.00881697	0.517068			Ndufb5	0.00043186	-0.305682
	AABR07052430.1	0.00709029	0.333378			Yipf5	0.00889087	-0.383838			Sp110	0.000446942	0.394851
	Gpsm3	0.00335497	0.333168			Zfx	0.0091084	-0.301515			LOC100362027	0.000449368	-0.291734
	Il1rapl1	0.084506	0.332279			Atcay	0.00916795	-0.415995			Dbi	0.000451022	-0.336609
	Scn5a	0.0205748	0.332085			Psmb5	0.00923707	0.36145			Fdx2	0.000461061	-0.33838
	LOC100362339	0.00552629	0.331595			Xkr4	0.00923851	-0.423583			AABR07026125.1	0.000475714	-0.329598
	Rps18l1	0.00524883	0.33118			Gmds	0.00924487	-0.424547			Ldhb	0.000480292	-0.299368
	Stxbp5	0.00089137	0.331066			Ubr5	0.00926758	-0.365813			Fabp3	0.000493021	-0.375572
	Arl15	0.00795982	0.330758			Esrrg	0.00936218	-0.312319			Ube3d	0.00049335	-0.315335
	Nupl2	0.0191693	0.330503			C1ql1	0.00936265	0.321696			Ascc3	0.000497163	0.633977
	Sult1a1	3.13353e-05	0.330472			Mmd	0.00938349	-0.412484			S100a3	0.000499234	1.02752
	Pmm1	0.00666075	0.329976			Topors	0.00943318	-0.339826			Mrpl13	0.000503347	-0.335848
	LOC297756	0.0145706	0.329867			Cd81	0.00945194	-0.435412			Ifngr2	0.000524745	-0.308125
	Ppdpf	0.00241855	0.329821			Tenm4	0.00947859	-0.351873			Mmd	0.00055932	-0.410496
	Nfx1	0.0156339	0.329784			Rps4x-ps9	0.00973036	0.476506			Rpl22l1	0.00057083	-0.291541
	AABR07060778.1	0.0156138	0.329588			Epb41l2	0.00988401	-0.388713			Tpt1	0.000604338	-0.293369
	Itgb1bp1	0.00708105	0.329476			Map7	0.0100113	-0.411609			Smim10l1	0.000622432	-0.311075
	Eif3a	0.0328441	0.329394			Coq10b	0.0100335	-0.30725			Hap1	0.000627093	0.462276
	Galnt16	0.0025049	0.329051			Dip2a	0.0100781	-0.397005			Fam162a	0.000649569	-0.323424
	Xpnpep1	0.00664784	0.328919			Rasl11b	0.0101214	0.801759			Ly6e	0.000655663	0.612352
	Pex5l	0.00262718	0.328847			Atp5mc3	0.0101268	0.499256			Dpp7	0.000661776	-0.309904
	Olfm2	0.00990419	0.328628			Reep5	0.0101947	-0.38202			Gpi	0.000661946	-0.275537
	Golga4	0.0140865	0.328158			Pde3a	0.0102675	-0.286565			Cyc1	0.000666763	-0.273614
	AABR07034315.1	0.0174594	0.327645			Art3	0.0105017	-0.286079			Atp6v1e1	0.000677537	-0.304784
	Rps3	0.0024997	0.327617			Rab35	0.0107929	-0.258068			Rpl26	0.000678944	-0.324252
	Jak1	0.00372897	0.326865			Ndufa4	0.0108187	0.325893			Hdgfl3	0.000697681	0.485783
	LOC103694210	0.00979053	0.326848			Psmd6	0.0109653	0.614949			Psme1	0.000706771	0.612775
	Cct8	0.00582454	0.326784			LOC691113	0.0110863	-0.269182			Atf4	0.000710805	0.449203
	Lingo1	0.00849734	0.326541			Kdm5d	0.0111246	-0.275354			Bsg	0.000735612	-0.276479
	Csnk2a1	0.00407893	0.326347			Dpagt1	0.0111347	-0.307102			G6pd	0.000770613	-0.265734
	Grina	0.0358023	0.325426			Atf6	0.0111591	-0.364584			Fnbp4	0.000772537	0.541789
	Bcas2	0.00204828	0.324718			Dnajb9	0.0115997	-0.558248			Gtf2h5	0.000784458	-0.30496
	Fgf13	0.0149979	0.324524			AABR07028839.1	0.011799	-0.26537			Bcat1	0.000787888	0.301291
	Sema6a	0.0610851	0.324413			Clstn2	0.0119782	-0.394437			Sf3b5	0.000808129	-0.34333
	Dnajc3	0.00402552	0.323966			Ano4	0.0119948	-0.468743			H2afv	0.00082339	-0.328574
	Rnf114	0.0362452	0.323168			Wdr70	0.0124619	-0.298878			Caly	0.000845176	-0.321262
	Cmc1	0.0221842	0.322746			Nrsn2	0.0125685	-0.2816			Stx16	0.000846667	-0.305387
	Scyl2	0.0684519	0.321709			Hexa	0.0125788	-0.296233			Dapk3	0.000847221	0.466498
	Nyap2	0.116293	0.321568			Nr3c2	0.0130438	-0.306745			Zfp385d	0.000852613	0.563921
	Shisa6	0.0089552	0.32148			Scaf8	0.0131041	-0.288454			Cyb5b	0.000863043	-0.307465
	Cndp2	0.00543249	0.320846			Hnrnph2	0.0134008	-0.269756			Mllt11	0.000865138	-0.301688
	Bag1	0.0149462	0.320678			Rpn2	0.0134161	-0.39934			Anapc13	0.000866517	-0.395029
	Zfp771	0.0173811	0.320175			Jpt1	0.0134378	0.549466			Chn1	0.000874036	-0.264657
	Trafd1	0.0726802	0.319912			Klhl29	0.0136532	-0.545548			Mrps21	0.000900408	-0.338448
	Apba2	0.0364896	0.319464			Dnm3	0.0137322	-0.370439			Rpl18	0.000909243	0.349545
	Tmem178a	0.00190135	0.319447			Tasp1	0.0137477	-0.304242			Lsm5	0.000911227	-0.348737
	Mpdz	0.00268546	0.318466			Phf3	0.0138489	-0.44547			Snrpe	0.000912669	-0.327072
	Ifih1	0.000642375	0.318407			Ralgps1	0.0139448	-0.346123			Mtss1	0.000915806	0.4458
	Rpl14	0.000930448	0.318266			Sec63	0.0139698	-0.285295			Ywhaz	0.000932955	-0.309379
	Dph3	0.00115665	0.318183			Camta1	0.0139795	-0.377819			Sycp1	0.000939716	-0.292958
	2022-09-06	0.00523424	0.318046			Eid1	0.0139795	0.444597			Mrps15	0.000942232	-0.335726
	Naa20	0.0044058	0.317382			Oxct1	0.0141416	-0.346651			Sfrp2	0.00094318	-0.287651
	Phf5a	0.00235356	0.316406			Gad1	0.0141664	-0.281601			Lhx9	0.000945954	0.373246
	AABR07031089.1	0.0192909	0.316079			Zranb2	0.0142037	-0.499134			RGD1308134	0.000962324	-0.317437
	Mllt6	0.00773037	0.315982			Pnisr	0.0142924	-0.327699			Fbxw7	0.000972684	0.497476
	Rrbp1	0.0838565	0.31582			Ryr2	0.0143463	-0.536145			B3galt5	0.0010096	0.342855
	Kcnh7	0.0436319	0.315767			Sel1l	0.0143902	-0.304186			Rbm4b	0.0010128	-0.295649
	Mycn	0.0141043	0.314638			Strada	0.0146164	-0.34653			Ost4	0.0011116	-0.31012
	Rpl22	0.0136086	0.314512			Nrg2	0.0150149	-0.393581			Tmem91	0.00111594	0.322273
	AABR07027870.1	0.0351378	0.314396			Cse1l	0.0150835	-0.253548			Itgb3bp	0.00113623	-0.256455
	Grpel1	0.00830855	0.314054			Sparcl1	0.0150866	-0.358361			Epha5	0.00114384	0.386303
	RT1-T24-1	0.00165737	0.313652			Plekhm3	0.015218	-0.391874			Spred1	0.00117316	-0.288548
	Rpl41	0.00230613	0.313403			Itm2c	0.0154662	-0.331662			Ndufa13	0.00122767	-0.311214
	Zfp277	0.0369584	0.313359			Itsn1	0.0156096	-0.286713			Ndufs7	0.00125499	-0.33092
	Calm3	0.00301918	0.313078			2022-03-04	0.0158884	-0.365085			Rps28	0.00125822	-0.296041
	Med4	0.0113937	0.312902			Bud31	0.0161736	-0.276946			Nrxn3	0.00126337	0.4928
	Ankrd50	0.00316223	0.312733			Suds3	0.0162428	0.633557			Pcyt2	0.00128685	-0.2777
	Slc32a1	0.00574955	0.312689			Unc79	0.0163173	-0.380363			Eif2ak2	0.00132323	0.592239
	Csnk1a1	0.00211741	0.312236			Rlf	0.0163281	-0.278818			Mrps14	0.00132631	-0.268049
	Snca	0.0182924	0.31125			Igf1r	0.0164331	-0.488371			Id4	0.00134192	-0.31551
	Cast	0.00697227	0.311228			Tmem165	0.0165137	-0.252169			Slc25a5	0.00134617	-0.313968
	Igf2bp2	0.016424	0.311186			Cpeb3	0.0165907	-0.329051			Il18bp	0.00134869	0.3346
	Rpl35	0.0123689	0.31081			Lrrc61	0.0167369	-0.301308			Akirin2	0.00138617	0.427596
	Atf6	0.0417592	0.309628			Wac	0.0168407	-0.310287			Psap	0.00139041	-0.284439
	Gab1	0.00375898	0.309622			Id4	0.0169005	-0.474605			Mettl18	0.00139614	0.322381
	Map7d1	0.00580955	0.309504			Tpi1	0.0169345	-0.344616			Pfdn5	0.00140409	-0.302692
	Dnpep	0.00660007	0.309195			Rap1gap2	0.0169393	-0.404316			Sez6	0.00143594	-0.323136
	AABR07021871.1	0.00532573	0.309134			Eif4a2	0.01704	-0.366295			Rprml	0.00145641	0.272841
	Ptprd	0.00331682	0.308765			Dlg2	0.0170877	-0.314939			Rpl28	0.00151037	-0.313212
	Ddx31	0.00494021	0.308335			Abhd18	0.0172409	-0.25123			Fosb	0.0015369	0.669866
	Nosip	0.00241201	0.3074			Cnot1	0.0175359	-0.285509			Ntrk1	0.00153921	0.476297
	AABR07032622.1	0.00487684	0.307208			Cit	0.0178128	-0.376946			Ubtf	0.00154062	-0.305701
	Cox7c	0.00592594	0.306803			Rbm5	0.0178328	-0.408833			Mtmr9	0.00154243	-0.398374
	Uba7	6.65505e-05	0.306635			Tmf1	0.0180809	-0.269144			Znhit1	0.00160737	-0.287658
	Csgalnact1	0.0263699	0.306605			Dcun1d4	0.0183748	-0.271686			Ddrgk1	0.00161502	-0.259062
	Chrna4	0.00115767	0.306558			Grm8	0.0186233	-0.259302			Slc43a2	0.00162171	-0.298646
	Gpx4	0.00322915	0.306164			Bax	0.0186701	0.680064			Ndufb10	0.00163447	-0.315368
	Rapgef6	0.0156171	0.305641			Slc12a5	0.0187505	-0.281561			LOC108350501	0.00170654	-0.275305
	Ankrd11	0.0054959	0.305584			Lin7a	0.0188512	-0.320428			Eef2	0.0017095	0.401419
	Ubxn4	0.0143691	0.305583			Smad1	0.0193719	-0.258326			Ndufa6	0.00175063	-0.263383
	Rpl36al	0.008723	0.305577			Ube2k	0.0194911	-0.371491			B3galt2	0.00177469	-0.41485
	Zdhhc17	0.0414456	0.305029			Tmem160	0.0195894	0.640919			Btbd8	0.0017952	-0.324948
	Scn1a	0.0106193	0.304691			Sla2	0.0196407	-0.349359			Eif3d	0.00187532	0.383074
	Eif6	0.0144683	0.304244			Msmo1	0.0197117	-0.569956			2022-09-04	0.00187854	-0.336613
	Socs1	0.00724943	0.303946			Trmt61a	0.0197168	-0.250492			Sez6l2	0.00198612	-0.319402
	Ssbp4	0.00614399	0.303721			Grin2a	0.019918	-0.521773			Ufc1	0.00198751	-0.329075
	Usp38	0.051905	0.303473			Faf1	0.0199501	-0.29097			Ncam1	0.00199791	0.336293
	Rbm8a	0.00382625	0.303428			U2surp	0.0199621	-0.263638			Zfyve28	0.00202617	0.380294
	Rps29	0.0182664	0.302944			Frmd3	0.0200746	-0.459022			Atp5f1c	0.0020374	-0.289401
	Rbm27	0.0436649	0.302441			Far1	0.0204406	-0.305323			Ppat	0.00204447	-0.273701
	Cib2	0.0031552	0.302235			Snx24	0.0205443	-0.362508			Enah	0.00207292	-0.307201
	Ywhab	0.005349	0.302006			Tesk2	0.0208133	-0.276729			Atp6v1d	0.00213297	-0.253415
	Kif5c	0.0033482	0.301959			Cyp51	0.0208165	-0.396013			Fam81b	0.00214224	0.304669
	Actr10	0.0102497	0.301355			Rbm8a	0.0209024	0.586335			Dpcd	0.00215421	-0.307633
	Gmps	0.0132343	0.301333			Ndufb9	0.0212794	0.390084			Fus	0.00216413	0.328797
	Zfp638	0.0207489	0.301202			Cacng2	0.0213574	-0.314736			AABR07044711.1	0.00218571	-0.277396
	Plekhb2	0.0222119	0.299512			Mpped2	0.0213676	-0.465384			Atp8a1	0.00225176	0.484111
	Akt1	0.00571559	0.29946			Ankib1	0.0215613	-0.337954			Use1	0.0023019	-0.314389
	Rpl24	0.0112209	0.299128			Klhl32	0.0215969	-0.433686			Trappc11	0.00233014	-0.269086
	Ak2	0.00838644	0.299107			Abcg1	0.0217385	-0.336169			Fam135a	0.00233378	0.375519
	Snx24	0.0103953	0.298658			LOC100364457	0.0217527	0.538702			Cdipt	0.00233392	-0.332551
	Vdac2	0.00440966	0.298115			Fdft1	0.0219161	-0.356803			LOC498555	0.00237235	-0.263274
	Rabepk	0.023146	0.297983			Ssbp3	0.0219341	-0.277055			Isca2	0.00239317	-0.258627
	LOC100360491	0.00683812	0.297974			Osbp2	0.0220602	-0.287059			Rexo2	0.00239829	-0.258991
	LOC100362830	0.00504255	0.297618			Igbp1	0.0225352	-0.302569			Srsf12	0.00242241	0.422979
	Rpl7	0.0120395	0.297597			Rpl14	0.0225934	0.359385			Tex264	0.00245092	-0.306452
	Ifrd1	0.00167186	0.297383			Snx5	0.0227793	-0.316947			Pold2	0.00251832	0.295797
	Crtac1	0.0059782	0.297059			Erh	0.0229458	0.461253			Necab3	0.00253561	-0.303176
	Dtx3	0.0197741	0.296982			Nsdhl	0.0232051	-0.365031			Kif1a	0.0025365	0.374518
	Nrsn2	0.0546892	0.296863			Dnajb11	0.0232142	-0.374493			Lrp11	0.00255279	-0.267145
	Ppp1r14c	0.0021088	0.296748			Trim17	0.0234841	-0.250438			Cdh12	0.00257674	0.598198
	Rps23	0.0164848	0.296482			Ddx10	0.0236244	-0.26289			Cep97	0.00260608	0.391216
	Adamts6	0.0206055	0.296356			Pigu	0.0237733	-0.447959			Imp3	0.00261629	-0.310573
	Dtymk	0.00486299	0.29594			Crabp1	0.0239726	0.548312			Timm17a	0.00273383	-0.291488
	Dynlt3	0.00221102	0.295917			AABR07072400.1	0.0240888	0.533704			Uchl1	0.00274781	0.283265
	Smim19	0.00415028	0.295139			Ssh2	0.0241006	-0.31396			Nova1	0.00281111	-0.268039
	Bok	0.0246604	0.295098			Upf2	0.024263	-0.319757			Lmbrd1	0.0028184	0.437484
	LOC102556337	0.0243452	0.294984			Kif13b	0.0244917	-0.291479			Sap18	0.00286066	-0.280635
	Dlg5	0.00567857	0.294158			Tubb5	0.0244922	0.450804			RT1-M3-1	0.00289458	0.503583
	MGC105567	0.000366578	0.294013			Cadm2	0.0248854	-0.266741			Vamp2	0.00319278	-0.266373
	Ogfr	0.0685227	0.293736			Bloc1s1	0.0250099	0.621602			AABR07007675.1	0.00323643	-0.268232
	Ncoa7	0.0554082	0.293461			Miga2	0.0252037	-0.257443			Bin1	0.00323677	0.312989
	Pmepa1	0.0218795	0.293371			Slc16a3	0.0255855	-0.306005			Vps11	0.00333145	-0.257979
	LOC108348172	0.0280963	0.293186			Mapk10	0.0258323	-0.256688			Vdac2	0.00339278	-0.259825
	Far1	0.00175069	0.293136			Etv4	0.0258945	-0.293978			Surf6	0.00344308	0.320338
	Vav3	0.0228265	0.292775			Dop1a	0.0259734	0.648415			Dazap1	0.00345125	0.30672
	Cox6c	0.00558136	0.292696			Ddit4	0.0260964	-0.365263			Nme1	0.00347362	-0.286822
	Ube2q2	0.177698	0.292658			RT1-CE10	0.0261879	1.08212			Rps8	0.00348524	-0.261425
	Stx1a	0.0327896	0.292534			Cltc	0.0265676	-0.302919			Celf2	0.00351347	0.365023
	Garnl3	0.0196921	0.292			Ube2e3	0.0266442	0.438069			Zfp629	0.00354704	-0.351526
	Thra	0.00998337	0.291837			Tvp23b	0.0268327	-0.32158			Rpp25	0.00356816	-0.276348
	Ctsb	0.00703271	0.291681			Spcs2	0.027441	-0.398593			Samhd1	0.00359372	0.252157
	Ythdf1	0.0354811	0.291517			Ralyl	0.0275911	-0.304968			LOC108349682	0.00363671	-0.304164
	Ncdn	0.00897402	0.291462			Asmtl	0.0276028	0.589723			Mrpl55	0.00366095	-0.253569
	Pdgfd	0.00246631	0.290848			Grm5	0.0277134	-0.322231			Mt-nd5	0.00369578	-0.263498
	Rpl11	0.0105939	0.290711			Abracl	0.0277169	0.553205			Ndfip2	0.00371694	0.276131
	Gkap1	0.0100113	0.290653			Asb2	0.0278137	0.693358			Sem1	0.00376947	-0.277776
	AABR07043748.1	0.00513661	0.290532			Dpysl5	0.0278492	-0.287941			Ap1s1	0.00387909	-0.297873
	Myo1b	0.00755884	0.289651			Arih1	0.0283749	-0.367672			Il1rapl1	0.00388843	0.676548
	Tpm1	0.0057011	0.289118			Rai1	0.028448	-0.340779			Cd47	0.00392397	0.354461
	Nfu1	0.0131158	0.288454			Strip1	0.0285768	-0.295629			Las1l	0.0039406	-0.251411
	Rasa4	0.0585555	0.288307			Ntrk3	0.028802	-0.333625			Insyn1	0.0039984	-0.293076
	Nbl1	0.0298485	0.288269			Fnbp1l	0.0288635	-0.281271			Ptbp3	0.00402047	0.460415
	Rarres2	0.00481686	0.288041			Chga	0.0289013	-0.425463			Atp2a2	0.00406751	-0.282601
	Gadd45a	0.182283	0.287141			Reps2	0.0291625	-0.273746			Haus4	0.00407574	0.255984
	Ddx24	0.0233953	0.286756			Stat4	0.02926	1.01299			Sdhc	0.00407727	-0.288057
	Suds3	0.00464912	0.286711			Tada2a	0.030014	-0.253855			RGD1306063	0.00409824	-0.267537
	Tiprl	0.0059735	0.286461			Bpnt1	0.0301093	-0.309663			Trank1	0.00420882	0.455503
	Bcas1	0.00836179	0.286195			Sik3	0.0301417	-0.378223			Cndp2	0.00425221	0.371163
	Slc48a1	0.0184622	0.285784			Efhc2	0.0303193	0.475778			Polr2k	0.00429297	-0.273337
	Lifr	0.0301901	0.285781			Rab3b	0.0303808	-0.413391			Stk32c	0.00430212	0.260532
	Dnm3	0.0216174	0.285156			Rbm18	0.0305228	-0.356629			Bloc1s1	0.00430458	-0.256486
	Crot	0.00793078	0.285145			Hspa5	0.0307606	-0.681335			Agfg1	0.00431539	0.429519
	Slc12a5	0.0144724	0.284942			Abcc5	0.0307619	-0.372783			Trpc1	0.0043263	-0.275461
	Gtf2h1	0.0396882	0.284362			LOC102556337	0.0308215	0.492358			Rbm3	0.00434219	-0.306801
	Sel1l3	0.0213048	0.284336			Slc39a11	0.0308863	-0.392109			Hccs	0.00438696	-0.337907
	Tmed9	0.0293328	0.28414			Pde4dip	0.0309573	-0.319625			Rfc3	0.00439784	0.275775
	Brdt	0.159272	0.283872			Taok3	0.0312661	-0.255242			Cntnap5c	0.00445162	-0.2745
	Ppp2r5b	0.000984381	0.283839			Trim67	0.0312708	-0.262795			Tuba8	0.00462178	0.383105
	Cars2	0.0150581	0.283658			Rnf187	0.0318527	0.39723			Add3	0.00463817	0.346314
	Rpl18a	0.031383	0.283124			Nsg1	0.0318601	0.488207			Taf10	0.00464963	-0.286441
	Hdac1	0.00436631	0.282476			Galnt9	0.0319677	-0.282363			LOC100361934	0.00468699	-0.25434
	Clpx	0.00622227	0.281907			Tspan17	0.0322045	0.620153			LOC100360117	0.00472495	0.333814
	Tmem164	0.011209	0.281723			Prmt2	0.032219	-0.319005			Hs2st1	0.00478924	0.439495
	Gnb3	0.0572765	0.281489			Slc33a1	0.0322621	-0.276356			Zfp827	0.00484779	0.494827
	Itga1	0.11238	0.281485			Clmp	0.0325166	-0.33018			Sft2d1	0.00496816	0.371673
	Ripor2	0.0480448	0.281422			Plppr3	0.0325686	0.606674			Cystm1	0.00502569	-0.300684
	P3h4	0.00512551	0.281342			Slc35b1	0.0330365	-0.321973			Spon1	0.00507847	0.365909
	Sh3glb1	0.0368311	0.281132			LOC103689961	0.033096	0.401116			Akr7a2	0.0051358	-0.274845
	Snw1	0.029997	0.280699			Casz1	0.0333445	-0.286643			Car11	0.00528385	0.371435
	Zfp180	0.00351551	0.280409			Prkca	0.0335328	-0.352892			Cox17	0.00532324	-0.287388
	Pdlim7	0.0350111	0.280131			Sqle	0.0338926	-0.326588			Laptm4a	0.00536157	0.271792
	Cdc37	0.0129408	0.279679			Ddx3	0.0340957	0.505902			LOC500956	0.00554816	0.408056
	Pax6	0.0166307	0.279105			Ebag9	0.0341728	-0.34041			Grik1	0.00554894	0.411122
	Tp53i11	0.000290839	0.278683			Stmn2	0.0342733	0.638275			Grm7	0.00555246	0.581867
	Commd2	0.0221421	0.278341			Adarb1	0.0342814	-0.262411			Babam1	0.00558115	-0.252345
	2022-03-03	0.144604	0.278137			Psma2	0.0342934	0.46605			Mars	0.00564677	0.442714
	Ndufb4	0.00388359	0.277905			Desi1	0.0343108	-0.263112			Adamts6	0.00564785	0.327942
	Trim24	0.0208626	0.277731			Psmc4	0.0345241	-0.286279			mrpl11	0.00573509	-0.354648
	Gpx3	0.00336977	0.277524			Fam193b	0.0345368	-0.304515			Rps27	0.00579669	-0.25057
	Zfp711	0.0241139	0.276886			Psmb9	0.0346805	0.691092			Ppm1b	0.0059124	0.300717
	Pex11a	0.00372895	0.276843			Ptpro	0.0358603	-0.264161			Paip2	0.00608789	-0.257202
	Enpp5	0.0265336	0.276443			Adcy8	0.0360488	-0.305029			Cfap97	0.00613925	-0.293739
	Rps10	0.10612	0.276303			Jmjd6	0.0360862	-0.265363			LOC103694169	0.00627279	-0.284509
	Hint1	0.00756959	0.276199			Pik3c2a	0.0363324	-0.257368			Alkbh7	0.00637249	-0.298978
	Fgf12	0.0475301	0.276059			Xpo6	0.0363963	-0.265827			Pros1	0.00642717	0.262925
	Arhgap15	0.00496971	0.275642			Mlec	0.0366497	-0.27335			Cacna2d4	0.00643818	-0.350259
	Odc1	0.105674	0.275434			Ubl5	0.036793	-0.370341			Kif3c	0.00644721	0.342229
	Elavl3	0.0155517	0.275415			Uvrag	0.0369862	-0.361155			Kcnj9	0.00645061	-0.254791
	AC120310.1	0.015235	0.275216			Bdp1	0.0370332	-0.297284			Btg2	0.0065102	0.389047
	Itgb1	0.0242923	0.274894			Olfm3	0.0370936	-0.425304			Nap1l1	0.00651265	-0.258691
	Nt5dc1	0.0869179	0.274537			Cttnbp2	0.0372489	0.565497			Esrrg	0.00658611	-0.25115
	Rassf1	0.0154956	0.274489			Acly	0.0372617	-0.303197			Setd7	0.00676247	0.37833
	Mapk9	0.103417	0.274295			Fnbp4	0.0373862	-0.274438			Cog2	0.00678419	0.283338
	Celf2	0.0643139	0.274189			S100a1	0.0376844	0.539905			Got1	0.00688536	-0.253119
	Dpp8	0.0101372	0.274084			Rragd	0.0376844	0.464474			Myo6	0.00704141	0.381594
	Rasgrp1	0.0335171	0.27366			LOC100365839	0.0378991	0.436804			Cebpb	0.00716454	0.416854
	Ctps2	0.0672365	0.273658			AABR07033720.1	0.0380457	-0.346607			Oca2	0.00743488	0.323068
	Nudt9	0.0696259	0.273399			AABR07040864.1	0.0381909	-0.379381			Lage3	0.00748781	-0.269333
	Canx	0.0450735	0.273177			Ctsb	0.0383348	-0.303915			Rasl11b	0.00749888	0.45029
	Wdyhv1	0.00870984	0.272702			Nbas	0.0386441	-0.291836			Cxcl14	0.00797788	-0.319258
	Rab7a	0.0126116	0.272439			Hadha	0.0387013	-0.282334			Tmsb4x	0.00810776	-0.286613
	Dach1	0.0585862	0.272429			Fam168a	0.038848	-0.294698			Zfp385c	0.00825986	-0.277219
	Ube2m	0.0270929	0.272403			Cnbp	0.039142	0.420675			Mrpl35	0.00829302	-0.301993
	Zc3h13	0.0192663	0.272287			Myo16	0.0392875	-0.259911			Ccdc28b	0.00837661	-0.260976
	Slc6a1	0.00437472	0.271752			Jund	0.0400781	0.562368			Rab40b	0.00843735	0.284517
	Bbof1	0.0161264	0.271391			Cux2	0.040324	-0.25013			Nkain2	0.00844437	0.454176
	Zbtb22	0.00742576	0.271358			Herpud1	0.0403387	-0.469486			Taf1d	0.00847494	0.336353
	Hpf1	0.00884289	0.271232			Eif3j	0.0405952	0.521155			Mtch1	0.00847761	0.278784
	Lsamp	0.0840328	0.270835			Ppard	0.0413474	-0.259759			Camkk2	0.00850628	0.325335
	Dennd4a	0.0394419	0.270703			Rab26	0.0414717	0.602195			Nup98	0.00860404	0.403233
	U2af1	0.0802305	0.270277			Rpl3	0.0418731	0.412381			Pura	0.00862733	0.340201
	Xrcc5	0.06921	0.270017			Abi2	0.0418962	-0.297503			Impact	0.00863283	-0.290121
	RT1-T24-3	0.00365203	0.269285			Ahcyl2	0.0426238	-0.454781			Ptprt	0.00879585	0.423192
	AABR07044362.3	0.130508	0.26917			Psme4	0.0428577	-0.290938			Dab1	0.0090466	0.311557
	Sorcs1	0.00751492	0.269012			Trim32	0.0429009	-0.260905			Adgrg6	0.00912143	-0.29693
	Vps13c	0.0286646	0.268485			Ldlrad4	0.0436655	-0.26045			Wscd1	0.00916118	0.407702
	Nampt	0.0256817	0.268296			Slc12a6	0.043903	-0.269799			Tspan5	0.00916395	0.451479
	Arpc2	0.0226494	0.267986			Sec11c	0.0440707	-0.331818			Rell2	0.00921806	-0.264551
	Ak6	0.0248011	0.267758			Nme2	0.044203	0.36065			Dtnbp1	0.00924211	-0.268402
	Arl6ip5	0.0549046	0.267679			Wdr20	0.0450453	-0.260217			Usp25	0.00934988	0.353851
	Minos1	0.0377286	0.26728			LOC691995	0.0455809	0.595233			Igf2bp2	0.00937749	0.5804
	Mum1l1	0.0150314	0.266834			Rabggtb	0.0457668	0.431386			Mea1	0.00945801	-0.282313
	Bloc1s5	0.0428818	0.266831			Srrm4	0.0466485	-0.414514			Crem	0.00946955	0.350549
	2022-03-11	0.019906	0.265792			Cacna1d	0.046667	-0.256163			Fat3	0.00962008	0.400598
	Selenof	0.00778278	0.265666			Nap1l5	0.0467149	-0.27419			Phactr2	0.00964645	0.33622
	Hmox2	0.0392385	0.265295			Ifi27	0.04678	1.00077			Chmp6	0.00966676	0.259402
	Pde7b	0.0743046	0.265253			Tmtc2	0.0470717	-0.306502			Gsk3b	0.00981209	0.266919
	AABR07071891.2	0.0404831	0.26479			Tnks	0.047642	-0.30056			Ern1	0.00985804	-0.252295
	Sapcd1	0.0303689	0.264711			Mat2a	0.0476612	-0.261197			Opcml	0.00987447	0.524665
	Rpl22l1	0.024959	0.26471			Samd12	0.0478713	-0.300136			Myl12b	0.0104658	-0.251208
	Tspyl4	0.0102616	0.264511			Exoc2	0.0478808	-0.28794			Ybx3	0.0107037	0.291957
	Btg2	0.0755436	0.2643			Cyb5r3	0.0481995	0.405698			Gpr158	0.0111225	0.474901
	Tmem160	0.0028851	0.264116			Cabp1	0.0485368	-0.257139			Cul5	0.0111354	0.283414
	Ngdn	0.000864311	0.263974			AABR07035916.1	0.0486972	-0.322495			LOC100911295	0.0112312	0.340897
	RGD1565641	0.0166786	0.263717			Sumo1	0.0487066	0.358521			LOC100909548	0.0113161	-0.257932
	Zranb2	0.084238	0.26365			Fbxo2	0.0489613	0.529719			Amotl2	0.0115247	0.292274
	Tent5a	0.000642375	0.263549			Kdm5b	0.0493075	-0.299453			Ndufab1	0.0120787	-0.269103
	Nln	0.003543	0.263454			Cct7	0.0500186	0.417726			Ank2	0.012121	0.365446
	Pex26	0.0242977	0.263121			Ubc	0.0502715	-0.261908			AC094217.1	0.0121491	0.335121
	Ntrk1	0.119967	0.262969			Hnrnpk	0.0504453	-0.251105			Raly	0.0122096	0.287592
	Crcp	0.0354153	0.262317			LOC100360117	0.0513555	0.320955			Atp2b4	0.0122395	-0.271026
	Ppp6c	0.045285	0.26221			Vdac2	0.051375	0.309779			AABR07019341.1	0.0125184	0.363678
	Slc7a3	0.00441275	0.26213			RGD1565616	0.0514839	-0.289943			Ipo9	0.0125925	0.335567
	Rps4x-ps9	0.0141954	0.261979			Cc2d1a	0.0522691	0.353502			Ankrd12	0.0126562	0.364565
	Pros1	0.00112204	0.261956			Eif2b2	0.0522735	0.476285			Cplx1	0.0128043	-0.261831
	Psma6	0.0168147	0.261771			Aff3	0.0524071	-0.296909			Ppp1r11	0.0129476	-0.267717
	Tmem169	0.0275581	0.261762			Stmn4	0.0530056	0.515183			Slc7a5	0.0129546	0.339036
	Rps19bp1	0.0210918	0.26168			Mkrn1	0.0530643	0.548051			Hdlbp	0.0130439	-0.250445
	Ppil1	0.0148488	0.261538			Phlpp1	0.0535969	-0.271118			Btg3	0.0134708	0.270895
	Ndfip1	6.86653e-06	0.261221			Atf2	0.0540394	-0.262404			Cdc42bpa	0.0136182	0.340212
	Borcs8	0.0252528	0.261176			Csrp2	0.0540769	0.485306			Zfp692	0.0136325	0.319794
	Ahi1	0.0147871	0.261172			Trafd1	0.0540769	0.491386			Cenpc	0.013669	0.331011
	Sgk1	0.072057	0.261097			P4ha1	0.0542717	-0.259407			Fermt2	0.0137311	0.339474
	Mknk1	0.00964149	0.260603			Ddit3	0.0543962	-0.420338			Phf3	0.0138989	0.367249
	Uchl1	0.0214325	0.260411			Atp6ap1	0.0544458	-0.361669			Arnt	0.0143001	-0.337019
	Pacsin1	0.0604897	0.260028			Hmox2	0.0544513	0.485608			Scg5	0.014348	-0.254028
	Fam174a	0.162653	0.259472			Peg3	0.0545341	-0.356959			Socs1	0.0145484	0.387292
	Eci3	0.042066	0.258625			Syn3	0.0547484	-0.284373			Mrpl41	0.0145864	-0.263929
	Fkbp4	0.0290788	0.258588			2022-09-11	0.0547757	-0.326145			Nudt9	0.0148457	0.35119
	Grm7	0.0880641	0.258546			Tnik	0.0552715	-0.315481			Elp1	0.0149497	0.283507
	Vapa	0.0124028	0.258177			Cops9	0.0553461	-0.341811			Ptprs	0.0149733	0.316964
	Tmed2	0.0751245	0.257945			Lhx9	0.055358	0.51506			Taf7	0.0151881	0.267234
	Tial1	0.0344676	0.256943			Cep290	0.0553644	-0.280841			Isyna1	0.0153879	0.310017
	Entpd4	0.0205834	0.256811			Itsn2	0.0554162	-0.286255			Nars	0.0154401	0.292457
	LOC687780	0.0724624	0.256503			Hsd17b12	0.0560065	-0.274373			Tmbim4	0.0154504	0.300481
	Galnt13	0.0152493	0.256428			Oxa1l	0.0563296	-0.29749			Mien1	0.0154935	-0.268046
	Hnrnpa2b1	0.0294072	0.256116			Ifi27l2b	0.0566566	0.948195			Rbm5	0.0161214	-0.250091
	Fam241b	0.0349018	0.256103			Ankrd55	0.0568546	-0.329649			Pknox1	0.0161592	0.287086
	Msantd4	0.0296586	0.255799			Rpl13a	0.0572215	-0.334804			Uhrf1bp1l	0.0163121	0.341604
	Hexb	0.0396638	0.255685			Sqstm1	0.057373	-0.257797			Scand1	0.0165059	-0.253265
	Esd	0.0184903	0.255672			Dhrs7b	0.0576072	-0.293124			Myt1l	0.0165908	0.363
	Wasf1	0.0259183	0.255614			Tcf12	0.0576533	-0.266524			Necab2	0.016785	0.381908
	Apc	0.0889369	0.255194			Six6os1	0.0589331	-0.284235			Tmem169	0.0169641	0.31679
	Rundc3a	0.0356367	0.254303			Nae1	0.0591739	-0.278241			AABR07060778.1	0.016966	0.296458
	AABR07072400.1	0.0395743	0.253899			Sufu	0.0594231	-0.343607			Mrpl23	0.0172166	-0.309579
	Aars	0.040341	0.253126			Usp9x	0.0594238	-0.260958			Smc3	0.0172519	0.310396
	Cdc42	0.00322285	0.25276			Scg5	0.0600919	-0.303205			Pde7a	0.0172792	0.347334
	Laptm4b	0.0146936	0.252554			Csde1	0.0600959	0.553932			Abcg1	0.017291	0.317808
	ST7	0.0271738	0.252511			Mllt11	0.0606268	0.338476			Eml6	0.0172942	0.395923
	Phax	0.0266091	0.252386			Foxn3	0.0606753	-0.28853			Mpzl1	0.0174618	0.334827
	Srrm1	0.0315569	0.252279			Trim33	0.0610155	-0.294603			Oat	0.0176079	0.309614
	Pcbp4	0.0831429	0.252204			Chd2	0.0613842	-0.352626			Sec63	0.0176604	0.355008
	Rps5	0.0439859	0.251739			Tap1	0.0613855	0.449836			Magi1	0.0177713	0.303516
	Galk2	0.10248	0.251707			Scoc	0.0619311	-0.30331			Cct4	0.0181715	0.300863
	Pard3b	0.0158919	0.251705			Gabrb2	0.0624408	-0.336326			Vipr2	0.0185601	0.377941
	Clta	0.00443622	0.251654			Tmem41b	0.0629101	-0.277576			Ppp2r2a	0.0186658	0.378421
	Msi1	0.0931157	0.251529			Wdr7	0.0630952	-0.326009			Psme2	0.0186862	0.281654
	Ccdc107	0.0134396	0.251396			Cwc27	0.0635593	-0.335971			Grik2	0.0186977	0.429401
	Pdcd4	0.0406709	0.25139			Pogz	0.0638699	-0.254125			Nyap2	0.0187171	0.466192
	Arfip2	0.0183243	0.251319			Atxn2l	0.064511	-0.251138			Negr1	0.0187565	0.428501
	Eloc	0.0410753	0.250683			Grik5	0.0649712	-0.289823			Ntrk3	0.0188436	0.408919
	Arl8a	0.0434647	0.250628			Sipa1l2	0.0650201	-0.279701			RGD1560394	0.0188871	-0.258803
	Cyfip1	0.0117891	0.250577			Hlf	0.0655316	-0.364614			Iqsec3	0.0189124	0.277586
	Calm2.1	0.0454284	0.250403			Dhfr	0.0664816	0.335962			RGD1309104	0.018916	0.34415
	Rnf207	0.0378833	0.250256			Gpc1	0.0664816	0.343855			Ptprd	0.0192893	0.400371
	Mrps18a	0.0155332	0.250165			Cul1	0.0665429	-0.293436			Calm2	0.0196059	0.301384
	5330417C22Rik	0.0324511	0.250154			Tmco1	0.066572	-0.343944			Rnd3	0.0196845	0.355927
	Eif3g	0.0747082	0.250049			Dis3l2	0.0665746	-0.276946			Fmnl2	0.0197129	0.343675
	Capn2	0.0606037	0.250028			Cpsf6	0.0669971	-0.26412			RGD1311847	0.0197236	0.298329
	Dlk2	0.00530828	-0.250379			Camkmt	0.0671594	0.527713			Dars	0.0198413	-0.255849
	Elavl4	0.0784804	-0.25075			Tmx4	0.0674014	-0.262974			AC134224.2	0.0198757	0.474048
	Zswim5	0.186772	-0.250991			Rfk	0.0676429	0.548485			Mtdh	0.0201455	0.316403
	Thoc6	0.0189795	-0.251651			Ate1	0.0688439	-0.317936			Ppp1r2	0.0204651	0.257644
	Ltn1	0.0156149	-0.251728			Enah	0.0691026	-0.257411			Mesd	0.0205552	0.284483
	Pfkl	0.0639805	-0.251734			Fosb	0.0695184	-0.377159			Nrsn1	0.0205674	-0.263707
	Tmem254	0.00700091	-0.25232			Cltb	0.0695697	0.356143			Spock3	0.0206411	0.409409
	Abhd6	0.0497786	-0.252374			Calm3	0.070272	0.447023			S100a16	0.0210321	0.597124
	Msrb2	0.0540686	-0.252587			Rpl28	0.0706716	-0.28254			Tmem130	0.0211362	0.287048
	Tsc22d3	0.0487142	-0.253397			Bloc1s5	0.0706718	0.476975			Eps15l1	0.0211422	0.347079
	Pabpn1	0.0293206	-0.253506			Scp2	0.0706911	0.343138			Fcf1	0.0213862	-0.256031
	Nrg2	0.0912052	-0.254009			Ptms	0.0707039	0.277724			Slc6a6	0.0214577	0.294115
	Clptm1	0.0923295	-0.254018			Tacr1	0.0707714	-0.317609			Rgl1	0.021599	-0.286294
	Lrba	0.0345899	-0.254198			Vegfb	0.0719726	0.344105			Adgrl3	0.0220727	0.483432
	Dcaf11	0.00612451	-0.254695			Gnai1	0.0719726	0.363394			Cd274	0.0220873	0.296084
	AABR07026125.1	0.0312302	-0.255041			Nptxr	0.0720861	-0.373545			Ppm1h	0.0221131	0.337613
	Dzip1	0.0379061	-0.255323			Ttc28	0.0723019	-0.250016			AABR07060620.1	0.0221474	-0.289262
	Xpr1	0.178593	-0.25665			Vps28	0.0724244	0.439651			Arfgap2	0.0222888	0.309771
	Fam57b	0.0884105	-0.257944			Syt4	0.0725724	-0.299345			Rpl13a	0.0224983	-0.268719
	AABR07025368.1	0.0137443	-0.258537			Pdia3	0.07306	-0.451922			Cox6a2	0.022754	0.314225
	Prrt1	0.0317211	-0.258605			Srsf3	0.0731923	0.41687			Apba1	0.0237124	0.349026
	Tbcd	0.0294072	-0.259092			Nptx2	0.0734008	-0.31986			Poc5	0.0241792	0.257406
	Cdh2	0.0426652	-0.259956			Rps3	0.0735716	0.278105			Mocs2	0.0243665	0.29287
	Cluap1	0.0152314	-0.260857			Akap6	0.0741348	-0.26812			Junb	0.0244971	0.390777
	Rsph6a	0.0038264	-0.260868			Kcnh5	0.0751516	0.599824			Hmox2	0.0249183	0.320291
	Git2	0.0324599	-0.261068			Ppm1e	0.0752878	-0.268179			Farsb	0.025622	0.259274
	Tm2d1	0.010189	-0.26136			Fto	0.0756145	-0.357371			Vip	0.0257351	-0.722718
	Trpc3	0.0266161	-0.261871			Cuta	0.076555	0.463212			Eri1	0.0258781	0.322065
	Scarb1	0.0124725	-0.261929			Magi2	0.0768907	-0.284472			Tent2	0.0266808	0.27414
	Pde7a	0.0767103	-0.263238			Tspan7	0.0768907	-0.369765			Sgta	0.026683	0.253244
	Hlf	0.0954895	-0.263371			Dars	0.0768926	-0.27677			Smyd2	0.0272279	0.269848
	AABR07025010.1	0.0225056	-0.263428			Dtd1	0.0769998	0.37779			Robo1	0.027282	0.534114
	RGD1562608	0.0231525	-0.263526			Chmp3	0.0778884	0.328844			Nedd4l	0.0273497	0.329296
	Bmpr1a	0.0148987	-0.264082			Hyou1	0.0781428	-0.312423			Paxbp1	0.0273826	0.274115
	Picalm	0.0389834	-0.264242			Gtf2e2	0.0782679	0.422758			2022-09-05	0.0274884	0.278266
	Hip1	0.0691651	-0.264472			Cobl	0.0782728	-0.345559			Cd59	0.028351	0.252375
	Wnk2	0.029433	-0.265492			Fbxo34	0.0783162	-0.320607			Pbx2	0.0285087	0.266416
	Rab11fip3	0.00779275	-0.265652			LOC108351043	0.0788799	0.369157			Cars	0.0289202	0.294621
	Nup98	0.0517012	-0.265716			Kcnb1	0.0791764	0.465391			Pcbp4	0.0293141	0.268752
	Apc2	0.0343298	-0.266165			B3galt2	0.079825	-0.31413			Pdia6	0.0296366	0.312629
	Zfp385c	0.0752324	-0.26678			Ctsa	0.0800889	-0.303685			Ctps1	0.0298908	0.291871
	Sesn3	0.145774	-0.267808			Rpl7	0.0804089	0.344089			LOC108349606	0.0301607	0.330578
	mrpl24	0.0392794	-0.267816			Dnajc12	0.0816249	0.523106			Hnrnpul1	0.0307053	0.285535
	AABR07035916.1	0.0844715	-0.268439			Cntn3	0.0818228	0.669744			Eif4h	0.0308212	0.252573
	Hmg20a	0.0915856	-0.268783			Hlcs	0.0819597	-0.258627			Plcg1	0.0314075	0.260341
	Alg14	0.00420811	-0.269794			Etf1	0.0822214	-0.340326			Sema6a	0.032357	0.328291
	Uxt	0.0083918	-0.269857			Ap4s1	0.0827551	-0.291973			Mgll	0.0324135	0.326465
	Cox4i2	0.00332779	-0.271055			Gnb2	0.0835845	0.368937			Naa30	0.0328891	0.254664
	Slc22a23	0.0317075	-0.27108			Vps18	0.0842616	0.290222			Pip5k1b	0.0329062	0.319493
	Cox18	0.00611237	-0.271166			Tmem53	0.0842616	0.326792			AABR07030521.1	0.0331543	0.284703
	Foxn3	0.187983	-0.271278			Plec	0.0842616	0.315033			Spop	0.0336314	0.285196
	Slc4a10	0.00786887	-0.271324			RT1-T24-1	0.0842616	0.353571			Pik3r2	0.0339149	0.301149
	Zmym6	0.120245	-0.271794			Eps8	0.0845463	0.46984			Nab2	0.0347822	0.256526
	Nav1	0.048633	-0.271856			Naca	0.0847549	0.292648			Rfx7	0.0348634	0.378008
	Dzank1	0.0466659	-0.272187			Neto2	0.0847573	0.436753			Dgcr6	0.0349248	0.258858
	Klhl29	0.0317205	-0.272499			Pmm1	0.0849447	0.472344			Ctnnbl1	0.0350107	0.306321
	Btbd11	0.0992239	-0.272505			Retreg2	0.0850643	0.432032			Micu1	0.0353273	0.290594
	Letm2	0.0131812	-0.272521			Inafm1	0.0852994	0.404166			Rpap3	0.0358778	0.278203
	Xpo1	0.00660522	-0.273955			Apoo	0.0858861	-0.578475			Bach2	0.0363291	0.338664
	Cyb5b	0.0135259	-0.27398			Opcml	0.0868023	0.526752			Tbc1d8	0.0363932	0.285733
	Ngb	0.00117969	-0.274247			Prima1	0.0870024	-0.254926			Crabp1	0.0365027	0.274255
	Fut8	0.0140259	-0.274331			Pik3ca	0.0871197	-0.277256			Parp1	0.036724	0.293809
	Atxn1	0.14064	-0.274995			Stx12	0.0874165	0.40672			Lox	0.0368398	0.265327
	Arhgef26	0.0669609	-0.275193			H2afv	0.0874315	0.425794			Fam13c	0.0374847	0.327385
	Magohb	0.000515241	-0.275494			Use1	0.0874865	0.462172			Cops8	0.0377614	0.298019
	Insyn1	0.0414275	-0.275506			Echdc1	0.0881071	0.502554			Trim11	0.0381592	0.291545
	Arhgef12	0.180486	-0.275689			Dtnbp1	0.0881718	0.346374			Khdrbs3	0.0385619	0.254801
	Thoc1	0.00845038	-0.276023			Psmb1	0.0883063	0.389436			Cbx7	0.0386241	0.264177
	U2af1l4	0.0221827	-0.276191			Guk1	0.0886438	0.295127			Agap3	0.0392801	0.287299
	Gphn	0.0151439	-0.276811			Asah1	0.0892468	-0.25262			Farp1	0.0395078	0.387594
	Egln2	0.0258809	-0.276876			Nmt2	0.0893065	0.402225			Pclo	0.0397917	0.336685
	Klf12	0.0346721	-0.277152			Morf4l2	0.0894436	-0.31534			Ptges3l1	0.0401263	0.294934
	Rorb	0.0467037	-0.277278			Armc6	0.0911276	0.314203			Rars	0.0402903	0.269705
	Sqle	0.0171008	-0.277764			Pln	0.0911276	0.333139			Ddit3	0.0418667	0.324361
	Selenoi	6.20641e-05	-0.278224			Trappc9	0.0912239	-0.305193			Pdia3	0.0420352	0.267301
	Ghr	0.0237211	-0.279442			Slc16a7	0.0919711	-0.37751			Rabep1	0.0421351	0.254257
	Tmem67	0.00299841	-0.279693			Trappc6b	0.0923452	0.408271			Ubn2	0.042429	0.282057
	Tex264	0.0225925	-0.280159			Nit1	0.0923923	0.496567			Nipsnap1	0.0427192	0.25179
	Tm7sf2	0.0219207	-0.280429			Mkln1	0.0927952	-0.272965			Slc4a5	0.0428184	0.325061
	Cdh8	0.000139897	-0.280656			Psma7	0.0939651	0.418063			Fam184a	0.0430413	0.288897
	Ints8	0.0133105	-0.281351			Zc3h15	0.0948276	-0.272829			Dvl1	0.0432488	0.273779
	Tcte1	0.0136791	-0.281419			Mrps24	0.0951963	0.481593			Plcxd3	0.0434369	0.275753
	Trappc9	0.0147135	-0.281516			Large1	0.095273	-0.285181			Ubxn4	0.0434858	0.271735
	Sufu	0.0732866	-0.281825			Fubp1	0.0955261	-0.257418			Ak6	0.0440989	0.334014
	Arih2	0.0283004	-0.281871			Vmp1	0.0956293	-0.272988			Ankhd1	0.0441682	0.366152
	Fundc2	0.00469028	-0.283402			Bbx	0.0962828	-0.345957			Scpep1	0.0442862	0.305295
	Scai	0.0544465	-0.285018			Bcas2	0.0963644	0.449158			AC134224.1	0.0447905	0.48575
	Tmem266	0.0368462	-0.285228			Fam49b	0.0965481	0.460471			Rapgef6	0.0450118	0.310045
	Vegfa	0.0189603	-0.285573			Tomm22	0.0973024	0.36793			Sirt6	0.0456745	0.288833
	Snrnp25	0.0412655	-0.285839			Rpl18	0.0973911	0.287711			AABR07044362.4	0.0461101	0.316444
	Ttc39c	0.00864323	-0.287668			Npm1	0.0978747	0.364867			Cntn4	0.0461866	0.472653
	Scmh1	0.046791	-0.288245			Mtus2	0.0982094	-0.287549			Hs3st5	0.0462867	-0.335154
	Secisbp2l	0.0185791	-0.288541			Samd9	0.0985249	0.402632			Dync1h1	0.0466107	-0.262076
	Ndst3	0.0519101	-0.288646			Zbtb6	0.0985249	0.265952			Flot1	0.0470357	0.296875
	Phf21a	0.0458847	-0.289071			Slc25a19	0.0985249	0.286969			LOC100912566	0.0474871	0.266714
	Dnm1	0.000532283	-0.289276			Gab1	0.0985249	0.324231			Fstl4	0.0481844	0.361207
	Kcnma1	0.147674	-0.289423			Kctd13	0.0995131	0.448327			Slc17a5	0.0487821	0.260247
	Med13	0.0229227	-0.290004			Camk2b	0.0997775	0.377825			Pias2	0.0496525	0.287105
	Il17rd	0.0164913	-0.290241			Klhl24	0.100323	0.394338			Tmtc2	0.0498942	0.451225
	Cacna1d	0.127532	-0.29053			Evl	0.100333	0.404251			AABR07054639.1	0.0503183	0.327862
	Metap1d	0.0165236	-0.292446			Svbp	0.100372	0.471886			Tulp1	0.0510455	-0.252742
	R3hdm1	0.016172	-0.292641			Ppp5c	0.101088	0.452166			Casd1	0.0510498	0.262173
	Sec14l1	0.00301027	-0.292754			Nav2	0.102134	-0.362406			Ptk2	0.0512456	0.34488
	Sorcs2	0.0176488	-0.294604			Psenen	0.10294	-0.315152			Memo1	0.0515402	0.358211
	Grm1	0.0225676	-0.295268			AABR07060778.1	0.103355	0.417106			Erc2	0.0521046	0.384448
	Odr4	0.00423522	-0.295797			Dip2c	0.104163	-0.286268			Btrc	0.0534633	0.303234
	Tbc1d5	0.038664	-0.296509			Nvl	0.104179	0.404263			Olfm2	0.053534	0.251973
	AABR07035946.1	0.0304866	-0.298907			Cfap410	0.104179	0.427755			B3gat3	0.0538483	0.256505
	Kif5a	0.0497072	-0.29951			Uqcc2	0.104479	0.505434			Dpagt1	0.0544813	0.288101
	Arl4d	0.0257833	-0.299693			Ccdc124	0.105677	0.371331			Herpud1	0.0550543	0.343323
	Nsg2	0.00707762	-0.300983			Itgb1bp1	0.106239	0.499346			Syt4	0.0561117	0.254101
	Cpe	0.00026623	-0.301441			LOC103694902	0.106348	-0.336451			Wdfy3	0.0563074	0.298917
	Map7	0.0183487	-0.301625			Appl2	0.106496	0.262848			Btbd11	0.0565554	0.264704
	Cend1	0.0299441	-0.302429			Ppm1f	0.106496	0.279274			Jade1	0.0586983	0.266362
	Aph1b	0.0351448	-0.30304			Tsc22d1	0.10694	0.344702			LOC103693323	0.0596123	0.465803
	Klhl32	0.048537	-0.303736			AABR07015729.1	0.107174	0.469108			Aph1b	0.0602799	0.331362
	Elof1	0.111465	-0.304655			Dnaja1	0.108719	0.332202			Slamf7	0.0609111	0.263383
	Msmo1	0.0618587	-0.305104			Gabrg3	0.109323	0.281932			Cux2	0.060933	0.363007
	Fam222b	0.018087	-0.30513			RGD1311703	0.109347	0.383429			Pcmtd2	0.0617579	0.261188
	Aldoc	1.02442e-05	-0.306533			Acyp1	0.109744	0.402729			Prpsap1	0.0621318	0.283744
	Huwe1	0.174535	-0.307673			Mab21l1	0.110119	0.413234			Usp32	0.0621473	0.315195
	Ndufs7	0.00779951	-0.307731			Synpr	0.110313	-0.258298			Nbl1	0.0623966	0.333917
	AABR07017145.1	0.00423997	-0.307761			Ranbp10	0.111153	-0.267959			Kcnab1	0.0649179	0.281645
	Mospd3	0.00247136	-0.308655			Rpl18a	0.111206	0.449662			Ube2q2	0.0650606	0.287609
	Baalc	0.0213786	-0.308944			AABR07034669.1	0.111826	0.497693			Ikbkb	0.0658097	0.26376
	Spag9	0.0167005	-0.309589			Samd4a	0.112655	-0.404146			Camk2b	0.0666193	0.251912
	Abhd18	0.00380123	-0.310572			Dnm2	0.113577	-0.251429			Sphkap	0.0673021	0.305539
	Slc43a2	0.00451699	-0.311416			Nebl	0.113978	-0.316945			Als2	0.0674396	0.285962
	Olfm3	0.00357839	-0.31309			Stub1	0.115061	0.322452			Asns	0.0678146	0.372158
	Impact	0.00938342	-0.31338			Chn2	0.115085	0.266712			Usf1	0.068872	0.308823
	RGD1560925	0.0456627	-0.315145			Rassf4	0.115086	0.282331			Anapc1	0.0698824	0.30855
	Utrn	0.00456016	-0.315191			AABR07032806.1	0.115086	0.347162			Spindoc	0.0701013	0.265142
	Zfp407	0.0285608	-0.315436			Nlrc5	0.115086	0.341178			Pdcl3	0.0711781	0.264674
	Atp1b1	6.68059e-06	-0.315529			RGD1563482	0.115086	0.252136			Terb1	0.0718499	0.258211
	Tmeff1	0.000902332	-0.315647			Rtn3	0.115113	0.287842			Inpp4b	0.0719287	0.426214
	Rbm26	0.00822347	-0.318684			Dclk1	0.115227	-0.257829			Lmna	0.0719536	0.271878
	Adcy8	0.0335285	-0.319824			Ndufaf7	0.115338	0.395139			Pold3	0.0720715	0.30068
	Pde3a	0.0233698	-0.320617			Senp7	0.115563	0.424238			Gphn	0.0733953	0.279688
	Hccs	0.00852496	-0.320894			Arf4	0.116174	0.537134			Sulf2	0.0750625	0.333017
	Camk1d	0.0524235	-0.322121			Glrx2	0.116401	0.496949			Me3	0.0761419	0.366449
	Atp1b2	0.0105985	-0.325207			Gdap1	0.116441	-0.304191			Tango6	0.0777872	0.31148
	Htr2a	0.00200414	-0.32523			Fkbp8	0.1165	0.395361			Dip2c	0.0788274	0.263873
	Cacng7	0.0232099	-0.325718			Commd7	0.116852	0.510579			Mapk1	0.0797737	0.271862
	St7l	0.00962671	-0.32597			Polr3k	0.117739	0.394988			Ogfr	0.0801849	0.323395
	Map3k3	0.0419981	-0.328141			Gpx8	0.118291	0.379619			Kansl3	0.0803119	0.354863
	Peg3	0.0128669	-0.328633			Mbnl2	0.118702	-0.360281			Med1	0.0814599	0.291607
	Trim17	0.00705391	-0.328649			Necab2	0.118788	0.540563			Zmiz1	0.0814794	0.280956
	LOC108351137	0.00153287	-0.329007			Map1a	0.119179	-0.268566			AABR07007916.1	0.0827295	0.250866
	Taok1	0.0284649	-0.329592			Ddah2	0.120251	0.466551			Rtcb	0.0831282	0.290979
	Tpi1	0.0160674	-0.331025			Trnt1	0.120642	0.353535			Cop1	0.0832488	0.259292
	Por	0.000451268	-0.331146			Atp5pd	0.122616	0.331405			Clasp2	0.0832575	0.341419
	Aacs	0.00422482	-0.332902			Mrpl20	0.122658	0.361308			Trim2	0.0840521	0.322585
	Ttc3	0.000581167	-0.333875			Tubb3	0.122767	0.349166			Atf7ip	0.084168	0.28807
	Rapgef2	0.021692	-0.334002			Cdh20	0.123365	-0.252608			RGD1566099	0.0849539	0.260072
	Slc8a3	0.0164302	-0.334598			Tsks	0.124346	0.260979			Gnptab	0.0888064	0.26536
	Dlgap4	0.0239404	-0.336131			Bcar3	0.124346	0.316087			Mitd1	0.089216	0.27206
	Pin1	0.00832709	-0.338588			Plin2	0.124346	0.264181			Xpr1	0.0895816	0.297148
	Hmces	0.00257387	-0.339141			Mettl18	0.124346	0.274575			Rnf38	0.0906625	0.284763
	Rhbdl3	0.0186466	-0.339955			Mettl2b	0.124346	0.281437			N4bp1	0.0912714	0.293556
	Pgam1	0.000122597	-0.342641			Sin3b	0.124346	0.25739			Rdx	0.0917941	0.251354
	Dkk3	0.000332233	-0.343047			Ank3	0.124614	-0.263707			Fbxo2	0.0920155	0.267552
	Tpgs1	0.0237228	-0.34404			Zeb2	0.125942	-0.29422			Idh2	0.0923089	0.303988
	Fasn	0.0156771	-0.34411			Ephx4	0.127143	0.355282			Pdgfd	0.0925046	0.264379
	Ddhd1	0.00586689	-0.344647			Magt1	0.127756	-0.270333			Ripor2	0.0937971	0.346989
	Oxct1	0.00336816	-0.345089			LOC499331	0.127969	0.394831			Nfrkb	0.0939133	0.308577
	Clu	0.000788468	-0.346079			Fam92a	0.127969	0.443632			Capn7	0.0953959	0.268247
	Cadps	0.0039711	-0.348226			Ssbp4	0.128127	0.373243			Sesn2	0.0967561	0.388906
	Rbm5	0.00438703	-0.350632			Ndufa8	0.128209	0.292118			Gadd45g	0.0978045	0.628163
	Memo1	0.00342006	-0.351934			Pura	0.128957	0.446743			Cdh10	0.0982508	0.25001
	Rims2	0.0166124	-0.353072			AABR07068955.1	0.12901	0.333779			Ica1	0.0996972	0.262712
	Ptpn4	0.00332108	-0.353171			Mgst3	0.129368	0.458778			Zfp821	0.10145	0.288015
	Tspan5	0.00647213	-0.35461			Ndufb11	0.129421	0.260618			RGD1310951	0.103096	0.351568
	Ubr1	0.0104202	-0.355244			Cutc	0.129611	0.348946			Sema3e	0.103813	0.332589
	Tymp	9.23343e-05	-0.356019			Klhdc1	0.129611	0.304075			Gba2	0.10498	0.309512
	Fcho2	0.00564693	-0.356958			Tcf4	0.129611	0.434492			Nav3	0.107677	0.304266
	Dhx30	0.0230663	-0.358283			Nudt9	0.129699	0.385042			AABR07041411.1	0.108772	0.387574
	Sc5d	0.01808	-0.358977			Rab11b	0.130162	0.386863			Celf5	0.108859	0.432388
	Gnb1	0.0343318	-0.359262			Pole4	0.130588	0.382848			Mgat4a	0.109072	0.260837
	LOC103690302	0.00206828	-0.360653			Adam15	0.131313	0.334564			Zfpl1	0.109152	0.265805
	Gyg1	0.0125546	-0.360916			Adcy2	0.131391	0.375013			Hnrnpl	0.11058	0.33406
	Nme3	0.00661571	-0.361533			Ccdc107	0.132602	0.33492			Lrch1	0.112266	0.27357
	Samd4a	0.0616372	-0.362222			Nt5c3a	0.132813	0.40424			Prim1	0.112381	0.328827
	Stt3b	0.0169171	-0.362712			Fabp3	0.132837	-0.261535			Scn8a	0.114054	0.340571
	Sh3gl2	0.00323829	-0.36298			Cdk13	0.133528	-0.28495			Arhgap12	0.114369	0.290264
	Relch	0.013349	-0.364132			Rpl10	0.134027	-0.262724			Lrig2	0.115846	0.294989
	Ndufb5	0.00415423	-0.365921			Zfp110	0.134333	0.262835			Suco	0.117553	0.326283
	Akap6	0.0525471	-0.36663			Tmem91	0.134333	0.256369			Syndig1	0.119779	0.331611
	Ppp1r12a	0.004288	-0.371905			Plekhb1	0.134333	0.278069			Phf20	0.121649	0.251343
	Cald1	0.0255476	-0.373481			Isg15	0.134333	0.640649			Nceh1	0.123116	0.26995
	Pgk1	4.89602e-05	-0.374199			Cct5	0.136423	0.390919			Abcf2	0.123154	0.287216
	Trim9	0.0563791	-0.375159			Psmd7	0.137551	0.412294			Dnajb9	0.123314	0.277231
	Gria4	0.0230106	-0.377402			Ddx50	0.137948	-0.276716			Aff3	0.126662	0.352238
	Rsf1	0.0606586	-0.377455			Hdac2	0.138607	0.493724			Snd1	0.127432	0.313839
	Pld3	0.00274593	-0.378612			AABR07019341.1	0.140049	0.388758			Akap8l	0.127582	0.26462
	AABR07039806.1	0.00373804	-0.379279			Naga	0.141018	0.338144			Caskin1	0.129703	0.271913
	H2afy2	0.000479651	-0.379547			Arl16	0.141018	0.315397			Yeats2	0.129987	0.256281
	Pgls	0.00202821	-0.380122			Lamtor5	0.142316	0.319098			AC120310.1	0.13071	0.317552
	Peak1	0.00956666	-0.384016			Anp32a.1	0.14291	0.449442			AABR07033720.1	0.130749	0.395215
	Brwd1	0.00896766	-0.384695			RGD1311595	0.143058	0.353187			Atxn2l	0.131771	0.373777
	Xkr4	0.00199655	-0.384982			Gon7	0.143166	0.467837			Dnm3	0.133324	0.303948
	Pnisr	0.000111284	-0.385482			Cacnb4	0.143332	0.378666			S100pbp	0.13342	0.268359
	Osbp2	0.0351507	-0.385707			Ccdc91	0.144452	0.412567			Eif4g3	0.1343	0.318458
	Hmgcs1	0.00294364	-0.387125			Ssbp2	0.144912	0.497138			Hcn1	0.140544	0.273095
	Eef1a2	0.000221496	-0.387607			Crb1	0.145108	0.265674			Slc3a2	0.142754	0.259644
	Rexo2	0.00704014	-0.389391			Lgals3bp	0.145108	0.313587			Zbtb17	0.143102	0.250216
	Prkca	0.00906913	-0.389903			Amd1	0.146665	0.354055			Eprs	0.144008	0.276183
	Jarid2	0.00825963	-0.39013			LOC108349594	0.1478	0.430834			Kctd3	0.144166	0.269095
	Fabp3	0.00159684	-0.390254			Ptprf	0.150394	0.439304			Akap9	0.144375	0.304547
	AABR07052897.3	7.21977e-05	-0.391085			Gstp1	0.151402	0.312891			Usp47	0.14449	0.273783
	Dpf3	0.0197754	-0.391462			Cgref1	0.151517	0.350207			Ide	0.148259	0.310279
	Cpeb4	0.00414589	-0.391605			Puf60	0.15175	0.331175			2022-03-07	0.149177	0.2703
	Slc16a3	3.80118e-05	-0.391638			Nhlh2	0.15364	0.506009			Ubr3	0.151336	0.371947
	Phtf1	0.0188122	-0.391679			Eif5a	0.154004	0.262818			Ythdc1	0.152803	0.289802
	Fdft1	0.000258352	-0.394021			Psmd4	0.154964	0.394881			RGD1562339	0.153054	0.38423
	Fgf11	0.00019584	-0.395052			LOC100360491	0.154979	0.458337			Hspa13	0.153101	0.264974
	Sez6	0.00109096	-0.396142			Atp1a1	0.155233	-0.25285			Macf1	0.153927	0.292528
	Lnx1	0.000259408	-0.396549			Ndufa7	0.155757	0.396536			Ttc37	0.154018	0.281894
	Pfkp	0.010552	-0.396626			Psmc6	0.155864	0.353935			Thoc2	0.158086	0.298446
	Rc3h2	0.00117208	-0.396829			Rps5	0.156014	0.31923			Cnot6l	0.158919	0.275593
	Per3	0.00540624	-0.397456			RGD1310852	0.156741	0.267028			Slc37a3	0.161871	0.254698
	Cfap69	0.00419801	-0.398014			Ktn1	0.157097	0.379309			Cers6	0.164322	0.309342
	Ank3	0.0109192	-0.399027			Ap3b2	0.157117	0.362001			Fam117b	0.164573	0.42166
	Cdc14b	0.00651858	-0.399661			Grm7	0.157209	0.561362			Rprd1a	0.166025	0.301728
	Dmd	0.0515052	-0.400085			Srek1	0.15864	0.464004			Pcdha12	0.169729	0.288022
	Glrx5	0.000218913	-0.400311			LOC100359583	0.159351	0.258345			Ppp3cc	0.169871	0.277399
	Ogt	0.0663277	-0.400406			Eif4h	0.161559	0.251835			Smg6	0.170049	0.381533
	Cdh18	0.075144	-0.403182			Dbndd2	0.162118	0.405488			Klhl5	0.172138	0.265956
	Kcnc2	0.00142288	-0.403333			Sms	0.162211	0.436554			Nr1d1	0.178501	0.263161
	Rap1gap2	0.00251924	-0.403943			Aktip	0.162455	0.482973			Clip4	0.181048	0.268126
	RGD1308134	0.000142505	-0.403963			Gtf2b	0.162907	0.451894			Faf1	0.18178	0.302442
	Gng3	8.35365e-05	-0.407222			Mtmr1	0.165334	0.432088			Ctdspl	0.185326	0.256214
	Mbnl1	0.00776786	-0.407471			Dgki	0.165844	-0.251079			Nckap1	0.18657	0.273984
	Cyp51	0.00654948	-0.407837			Tmem179	0.166286	-0.265472			Nbeal1	0.191795	0.282807
	Nptx2	0.000984685	-0.410426			Sumf1	0.166696	0.307003			Arhgef12	0.195719	0.250926
	Oxr1	0.00060056	-0.41357			Emc1	0.166696	0.312819			Wasf3	0.196548	0.266544
	Trpm7	0.00135725	-0.415181			RGD1310352	0.166885	0.450501			Crcp	0.198988	0.252506
	Fdps	6.07869e-05	-0.416465			Ostm1	0.16809	0.333124			Hnrnph1	0.200437	0.250943
	Aco2	0.010865	-0.416747			Bcap29	0.168552	0.351405			Smg5	0.202959	0.296919
	Scg5	1.08772e-05	-0.418669			Ptprd	0.168681	0.622047			Ktn1	0.206176	0.297706
	Tecr	8.33112e-07	-0.418981			Dars2	0.168832	0.331587			Rock1	0.206624	0.265247
	Enah	0.000158959	-0.420464			Dnajc24	0.168879	0.385663			Map4k3	0.208139	0.269238
	Kcnk3	0.000157296	-0.431912			Osbpl8	0.168923	0.301439			Hfm1	0.210976	0.252165
	Mt-nd4	2.53893e-06	-0.432115			Dhx58	0.169308	0.274267			Srrm3	0.21596	0.284378
	Mmd	0.0012179	-0.437995			Cep112	0.169308	0.293076			Zfp608	0.216768	0.319587
	Dynll1	0.00171463	-0.440307			Scrg1	0.169308	0.256733			Cnbd1	0.216999	0.295287
	Ryr3	0.00819966	-0.445075			Mx2	0.169308	0.417421			Stoml1	0.22119	0.251481
	Sncb	1.98823e-07	-0.448955			Borcs6	0.169893	0.476146			Atad2b	0.223938	0.308762
	Kansl1	0.00258223	-0.449918			Edf1	0.170952	0.288229			Sobp	0.22542	0.327838
	Dlgap1	0.00334881	-0.459893			Naa20	0.172283	0.332973			Eea1	0.230467	0.258906
	Ryr2	0.000336587	-0.46005			Camta2	0.172411	0.378262			Fut9	0.233911	0.347057
	Zfp532	2.24257e-05	-0.463402			Pfkm	0.173136	0.351385			Neo1	0.23461	0.255887
	AABR07060133.1	0.00511414	-0.468071			Agl	0.173165	0.312554			Trio	0.243535	0.250177
	Cacna2d2	0.00732098	-0.473266			Il1rapl1	0.173541	0.438048			Slc25a27	0.25371	0.294051
	Fads1	9.23607e-05	-0.477964			Iscu	0.173815	0.342758			Rasal2	0.266485	0.333718
	Msi2	0.001632	-0.483185			Nop16	0.174018	0.409904			Nrxn1	0.270425	0.316302
	Sipa1l3	0.000620989	-0.483486			Mtmr7	0.176216	-0.324108			Atp8a2	0.270675	0.256598
	Atp6ap1	3.18778e-06	-0.488741			Ptpa	0.176938	0.391228			Zfp142	0.272045	0.281673
	Sarnp	8.82333e-05	-0.493288			LOC301124	0.176974	0.328339			Ttbk2	0.279841	0.258914
	Cacna1a	0.000885009	-0.495042			Hist3h2ba	0.177549	0.304578			Tnrc6a	0.288908	0.261478
	Tns1	0.000297245	-0.495786			Smim19	0.178644	0.345488			Polr3b	0.2892	0.261667
	Hist3h2ba	0.000130702	-0.505305			LOC100362339	0.179118	0.385443			Hs3st2	0.293065	0.338805
	Scd2	2.27284e-05	-0.508935			Atp23	0.179486	0.41846			Nmt2	0.294542	0.285714
	Idi1	0.00248136	-0.510961			Cav1	0.179608	0.338632			Prkca	0.297922	0.295654
	Atp5mc1	7.26642e-06	-0.511612			Rbms3	0.180297	0.501512			Gtdc1	0.298542	0.2533
	Col7a1	0.000133794	-0.515606			Tpm1	0.180356	0.409942			Pir	0.310597	0.261125
	Acyp2	9.745e-06	-0.516303			Phf14	0.180523	0.416489			AABR07059258.1	0.312447	0.306462
	Mt-nd2	1.6624e-08	-0.517733			Rfx5	0.181117	0.266508			Ube2h	0.312665	0.280938
	Nppa	0.00202504	-0.524711			Rbm26	0.182542	0.385286			Rnf216	0.313247	0.254584
	Gad1	2.33257e-11	-0.526135			Fam76a	0.183397	0.331407			Prkce	0.317698	0.26089
	C1ql2	3.91736e-08	-0.528388			Psph	0.183418	0.258017			Tmcc1	0.324444	0.317972
	Cemip	0.0162121	-0.531398			Virma	0.183643	0.36289			Gnb3	0.334262	0.283408
	Cadm2	0.00159164	-0.546427			Nudt11	0.183643	0.391173			Cyth1	0.343942	0.252109
	Nebl	1.95669e-05	-0.560187			Unc119	0.18472	0.418251			Slc23a2	0.350993	0.275717
	Dbp	0.000555117	-0.574365			Xpo4	0.184875	0.410033			Pde4b	0.357583	0.250035
	Caly	1.58243e-07	-0.589719			Sdcbp	0.18571	0.322125			Bicdl1	0.374291	0.278995
	Mt-co2	1.08766e-16	-0.60186			Esd	0.185831	0.299439			Arhgef11	0.374418	0.364173
	Prima1	2.83946e-05	-0.612356			Pdrg1	0.187729	0.396504			Coro2b	0.386573	0.253247
	Mt-atp6	3.00719e-09	-0.651695			Psmc2	0.188052	0.32144			Rps6ka3	0.390913	0.325479
	Mt-co1	6.43324e-17	-0.658238			Jagn1	0.191934	0.367595			Lpp	0.394785	0.253436
	Pitpnm2	3.78514e-06	-0.661745			Grm2	0.192009	0.294594			Arih2	0.3972	0.317643
	Ldha	2.36711e-11	-0.677594			Psmd14	0.192599	0.455116			Tmem255a	0.397975	0.250085
	Eif4a2	3.42885e-08	-0.692896			Scn1b	0.192707	0.333716			Tut4	0.409976	0.258599
	Dip2c	0.000265187	-0.707479			Psmd12	0.193613	0.321948			Magi3	0.416797	0.308503
	Mt-cyb	5.80891e-20	-0.731931			AABR07021871.1	0.19436	0.320688			Dennd1b	0.429042	0.285534
	Mt-nd1	1.05799e-10	-0.739261			Ube2s	0.194646	0.39347			Acap2	0.430402	0.32286
	LOC304725	0.000791361	-0.743993			Nos1	0.194942	0.39862			Luzp2	0.431366	0.286772
	Art3	7.58498e-07	-0.754052			Gucy1b1	0.195502	0.324644			Dennd1a	0.434516	0.256557
	Vgf	4.11341e-07	-0.77405			Wapl	0.19552	0.34682			Usp34	0.473747	0.308815
	Etv4	8.54151e-10	-0.782024			Mtx2	0.196205	0.342319			Shank2	0.504701	0.268111
	Slc6a11	9.91148e-07	-0.880131			Nabp2	0.196482	0.308954			Pou2f1	0.518934	0.274281
	Mt-co3	1.07889e-10	-0.917365			RT1-CE1	0.196703	0.337483			Usp24	0.527937	0.336522
	Pdzrn3	4.89151e-11	-1.10637			Rbm46	0.197554	0.326817			Atl3	0.586881	0.28985
						Ndufb5	0.198071	0.285899			LOC679342	0.591873	0.26303
						Eif3m	0.198736	0.386939			Tbcd	0.592126	0.301564
						Bex3	0.198943	0.27037			Dnm2	0.595314	0.254915
						Pafah1b2	0.199055	0.308111			Ice2	0.604147	0.28041
						Emc10	0.199125	0.358477			Dach1	0.625087	0.26312
						Lamp2	0.199125	0.325856			Arid2	0.628012	0.269789
						Gpr137c	0.199181	0.300846			Ncoa7	0.676259	0.253749
						Wdr44	0.199917	0.342865			Lman2l	0.74437	0.27647
						Bok	0.200004	0.354631			Klf12	0.812987	0.276879
						Map1lc3b	0.200019	0.312537			Gfod1	0.877292	0.261482
						Rnd3	0.200855	0.442836			Fgd6	0.942261	0.27063
						Prdx1	0.201044	0.38742			Mycbp2	0.952149	0.276234
						Uqcrfs1	0.201407	0.2509			Lcorl	0.968903	0.29803
						Srsf5	0.201528	0.39511
						Cir1	0.201789	0.43813
						Edil3	0.202104	0.333859
						Arid1b	0.202116	-0.282073
						Pop4	0.202473	0.350107
						Fam184a	0.202526	0.422723
						Rbmxl1	0.203533	0.443571
						Siah1	0.204045	0.384364
						Hsbp1	0.204161	0.269684
						Pnpt1	0.204373	0.346442
						Smim29	0.205137	0.431144
						Pcca	0.20589	0.368838
						Stt3b	0.206053	-0.264454
						Cacybp	0.206667	0.323726
						Rbm3	0.208025	0.396469
						Sap18	0.208446	0.286919
						Dctn2	0.209708	0.356694
						Nol7	0.211053	0.335113
						Sfrp2	0.211134	-0.299338
						Ppp4r3b	0.213438	0.482693
						Rpl37a	0.213488	0.427784
						Rabggta	0.213547	0.258068
						Gpn3	0.213547	0.260561
						Bckdhb	0.213839	0.360194
						Nmt1	0.213844	0.392517
						LOC100909840	0.213971	0.334101
						Mbp	0.21553	0.26377
						Greb1l	0.2159	0.438733
						Zranb1	0.215917	0.476848
						Pmepa1	0.215929	0.27798
						Fxr1	0.216106	0.352438
						Agpat1	0.216229	0.274589
						Flcn	0.216965	0.335326
						Rpl11	0.216966	0.376606
						Olfm1	0.21745	0.398498
						Klhdc3	0.217656	0.456001
						Rtcb	0.217681	0.429818
						Txn2	0.218203	0.355103
						Olfm2	0.218262	0.399239
						Tsnax	0.218605	0.341225
						Ywhah	0.219137	0.324763
						Galk2	0.220219	0.431841
						Mrpl54	0.221508	0.375268
						Acadm	0.221644	0.270003
						Dctn3	0.223376	0.26176
						Brd3	0.225086	0.344726
						Ybx1-ps3	0.226193	0.363731
						Tfdp1	0.226561	0.368564
						Hap1	0.226882	0.41821
						Tmx2	0.227083	0.262765
						Prpf4b	0.227177	0.259833
						Rwdd1	0.228655	0.371624
						Klf6	0.229155	0.418591
						Snrpd1	0.229719	0.364412
						Atad1	0.231205	0.301117
						Ddx52	0.231747	0.28621
						Ammecr1l	0.231747	0.26769
						Necab3	0.231867	0.43973
						Zfp330	0.232865	0.364401
						Taldo1	0.233062	0.327695
						Cnot8	0.233425	0.395849
						Stt3a	0.233526	0.440299
						Kifc2	0.233565	0.28166
						Rufy3	0.233801	0.425948
						Zfp207	0.234412	0.351597
						Hnrnpd	0.23552	0.294793
						Bap1	0.235849	0.374577
						Mrpl45	0.236069	0.362234
						Zmynd8	0.236178	0.365714
						Furin	0.236322	0.324165
						Arhgef18	0.236322	0.32148
						Gna11	0.237507	0.255518
						Rxylt1	0.237888	0.415436
						Ssb	0.239295	0.302694
						Arhgap15	0.240054	0.516336
						Commd3	0.242624	0.307206
						Chic2	0.243092	0.363586
						Hcn2	0.24403	0.26225
						Pdia6	0.24507	-0.319948
						Fam189a1	0.245531	0.347912
						Capza2	0.245791	0.26474
						Pithd1	0.245915	0.379183
						Ap3s2	0.246327	0.30335
						Rab6b	0.247093	0.309409
						LOC100363452	0.247107	0.337296
						Tmbim4	0.247428	0.358094
						Tomm7	0.249934	-0.317844
						Gps1	0.249934	0.276988
						Tbc1d31	0.25009	0.312964
						Ino80e	0.25027	0.317994
						Tmem120a	0.251413	0.271124
						Grina	0.251498	0.317996
						Coasy	0.254494	0.268252
						Myo6	0.254655	0.391184
						Eml5	0.255276	0.42904
						RGD1306271	0.257795	0.293367
						Ppp1r14b	0.258351	0.392331
						Vopp1	0.258767	0.398382
						Clns1a	0.259222	0.380103
						Nbl1	0.259389	0.367757
						Eif4e	0.261959	0.297086
						Syngr3	0.262093	0.300554
						Tm2d1	0.26211	0.262098
						Drap1	0.264471	0.375909
						Set	0.264706	0.296999
						Ostc	0.265178	-0.278166
						Chm	0.265905	0.43536
						Ddx27	0.266258	0.281699
						Cmss1	0.266405	0.317224
						Nnat	0.268187	0.536676
						Prpsap1	0.268533	0.456925
						LOC100909712	0.268991	0.346992
						Pdcd7	0.268991	0.353935
						Nrxn2	0.272015	0.250102
						Zfp385a	0.272244	0.378856
						Baz1b	0.272324	0.349962
						Mut	0.272662	0.25492
						Rrp15	0.273193	0.454355
						Rsbn1l	0.274388	0.358947
						Luzp2	0.274663	0.553832
						Abcf2	0.275445	0.283858
						Eda	0.276617	0.383888
						Smim8	0.277294	0.334071
						LOC100360573	0.278013	0.295088
						Enho	0.280529	0.303055
						Psma6	0.28054	0.277208
						Fitm2	0.281338	0.29998
						Gpr180	0.281338	0.29393
						Stac2	0.282092	0.370665
						Nelfa	0.284272	0.343255
						Tyw1	0.284273	0.272377
						Eif2ak2	0.285431	0.494518
						Phf7	0.287229	0.252573
						LOC100910528	0.287313	0.297196
						Pomgnt1	0.288264	0.337766
						Rnpep	0.289315	0.36621
						Polr1d	0.291084	0.309464
						Anp32b	0.291516	0.385424
						Clec2l	0.292294	0.302528
						Tbca	0.294307	0.262147
						Unc13c	0.295141	-0.614365
						Ctnnbip1	0.295516	0.357115
						Atp2b4	0.296075	0.367767
						LOC100361934	0.29636	0.276132
						Psme1	0.298013	0.603002
						Fam171b	0.298325	0.414067
						Csnk2b	0.298389	0.262931
						Fcf1	0.298838	0.2931
						Soga3	0.29933	0.416153
						Ptcd3	0.299816	0.273336
						Chn1	0.300399	0.295635
						Sars	0.300715	0.325783
						Srp9	0.300749	0.268177
						Mt-atp8	0.301981	0.345764
						Pdxp	0.302766	0.277071
						Immp1l	0.303408	0.390716
						Mcu	0.30494	0.336706
						Mrps34	0.306708	0.2709
						Gtf2a1	0.307679	0.327437
						RGD1562747	0.30807	0.285692
						Mrps28	0.308212	0.282449
						NEWGENE-6497122	0.312155	0.303747
						Timp2	0.312629	0.362788
						Ctps1	0.312671	0.325263
						Ube2g2	0.312777	0.276133
						Snx13	0.312996	0.308132
						Tmcc1	0.313203	0.263702
						Eif2b4	0.313823	0.276076
						Fam177a1	0.313823	0.333878
						Pdcl3	0.314039	0.34027
						Efcab14	0.314175	0.287887
						Uchl5	0.314961	0.380389
						Abcd3	0.31585	0.270214
						Nicn1	0.316181	0.331237
						Dnajc7	0.316381	0.281999
						LOC100911295	0.319149	0.273318
						Ppp4c	0.319706	0.297906
						Hectd1	0.320942	0.302588
						Fam104a	0.321019	0.333691
						Nedd4	0.321446	0.251306
						Fam91a1	0.321503	0.375912
						Srpra	0.322578	0.349247
						Zfyve19	0.322675	0.273008
						Ppp1r2	0.322955	0.381731
						Dnajb6	0.324103	0.262973
						Nudt2	0.325021	0.303312
						C2cd5	0.326013	0.351133
						LOC100360218	0.326932	0.297366
						Farp1	0.328651	0.473217
						Tm9sf4	0.329072	0.411878
						Zfp280c	0.330245	0.261718
						Ubr7	0.330245	0.274738
						Mapk11	0.330482	0.340332
						LOC103690141	0.330484	0.317513
						Fus	0.332579	0.259081
						Gtf2f2	0.333249	0.353686
						Wscd1	0.336865	0.349294
						Bbs5	0.338904	0.302864
						Inpp4b	0.339386	0.431353
						AABR07012054.1	0.34	0.30709
						Wdr41	0.341564	0.314699
						AABR07068351.1	0.341564	0.369483
						Gabarap	0.343444	0.285622
						AABR07068650.1	0.344837	0.35665
						Gria3	0.345305	0.315183
						Arl6ip5	0.345478	0.263257
						Ppp1r10	0.346247	0.295171
						Oasl2	0.347252	0.451027
						Rae1	0.347795	0.332124
						Lyrm4	0.347842	0.291436
						Stn1	0.348893	0.376268
						Lamtor3	0.348893	0.35846
						Rnd2	0.351877	0.339364
						Rabl2	0.353825	0.273155
						Igdcc3	0.353825	0.287186
						Washc1	0.353825	0.283457
						Ddx55	0.353825	0.254898
						Hnrnph3	0.353941	0.332961
						Dynlt3	0.354876	0.336527
						Rara	0.354876	0.32228
						AC096473.3	0.355104	0.370711
						Gng2	0.357255	0.272778
						Scg2	0.357349	0.351693
						Ppp3cb	0.358999	0.290609
						Mageh1	0.359447	0.281585
						Tpd52	0.360215	0.315372
						Igfbp7	0.360523	0.274659
						AABR07032135.1	0.361823	0.355366
						Mxra7	0.362797	0.303666
						Rmdn3	0.36397	0.28396
						Pibf1	0.364046	0.34325
						Dpm2	0.367473	0.255098
						LOC100361025	0.367494	0.262966
						Add2	0.367598	0.358622
						Dlgap3	0.368113	0.254072
						LOC103690015	0.36924	0.356687
						Sepsecs	0.370113	0.297845
						Spop	0.372075	0.266319
						Pcdh19	0.373615	0.32155
						Abraxas1	0.374537	0.340707
						Hddc3	0.374831	0.326738
						Adh5	0.375272	0.31944
						Slit2	0.376244	0.271169
						Megf8	0.377558	0.337619
						Entr1	0.377821	0.329746
						Fam76b	0.377876	0.326879
						Rerg	0.378956	0.279717
						Prcc	0.379182	0.311953
						Bod1l1	0.37952	0.31056
						Ptpmt1	0.379659	0.254051
						Ptges3	0.380343	0.293088
						Sdhaf1	0.381805	0.271588
						Gtf2a2	0.381912	0.281443
						Tex10	0.382608	0.278937
						Faap20	0.382608	0.255695
						Abcb7	0.382608	0.298533
						Mcm7	0.382608	0.294084
						Tmem199	0.382696	0.306192
						Napg	0.385052	0.332227
						Hnrnpa1	0.386929	0.279172
						Kdm4b	0.386949	0.27751
						NEWGENE-1310680	0.387338	0.295748
						Smndc1	0.387999	0.263321
						Mrps17	0.388905	0.316445
						Zfp507	0.390117	0.255375
						Opa1	0.390134	0.320168
						Lrrc4c	0.393863	0.378098
						Gabrb1	0.393905	0.350178
						Phf5a	0.393957	0.347386
						Sdf4	0.394369	0.314136
						Epha10	0.394456	0.350213
						Thra	0.394777	0.272046
						LOC102551095	0.395407	0.295392
						Anapc5	0.396531	0.389045
						Ppil1	0.397228	0.374797
						Terb1	0.397563	0.292493
						Cacna1h	0.397643	0.267119
						Mapk9	0.397829	0.269537
						RGD1304567	0.398383	0.339002
						Sfxn1	0.400541	0.368755
						Hdgfl3	0.402351	0.348515
						Osbpl6	0.405039	0.371965
						Il12rb2	0.405157	0.261542
						Safb	0.405881	0.334338
						Lrrtm4	0.407596	0.423947
						Disp1	0.407596	0.250307
						Fam136a	0.407789	0.30873
						Ogfr	0.407847	0.325202
						Ift27	0.408883	0.295439
						Ngef	0.410003	0.310322
						St7l	0.410146	0.297403
						Poln	0.410393	0.292556
						Rer1	0.410727	0.250812
						Spock3	0.412138	0.34551
						Fbxw7	0.41245	0.352557
						Leng1	0.413383	0.250407
						Ncbp1	0.413383	0.289558
						Phc2	0.413383	0.266347
						Fem1c	0.413383	0.2573
						Uimc1	0.413404	0.283706
						Rab12	0.413465	0.299413
						Lmbrd1	0.413477	0.313566
						Nyap2	0.414169	0.419079
						Trmt13	0.415666	0.268492
						Lrrfip2	0.416078	0.351577
						Gad2	0.416198	0.293435
						Rita1	0.416287	0.296083
						Tram1l1	0.417079	0.337004
						Vezt	0.417379	0.347365
						Srp19	0.421648	0.294071
						Kif5a	0.422526	0.33222
						Tef	0.422653	0.375024
						Cmpk1	0.423728	0.252708
						Ppp1r1a	0.423736	0.290605
						Ubl7	0.424355	0.359069
						Msrb1	0.426573	0.29003
						Mrpl44	0.427613	0.308725
						Psmb2	0.427619	0.292033
						Fhod3	0.428695	0.359765
						Celsr2	0.429243	0.288959
						Wdr76	0.429243	0.356595
						Mapkapk5	0.429395	0.275928
						Ttc7b	0.429459	0.267946
						Riok3	0.430294	0.284532
						Pgm2l1	0.43084	0.310879
						LOC100912578	0.430886	0.310341
						Bccip	0.431546	0.32155
						AABR07051787.1	0.432929	0.279245
						Mysm1	0.435443	0.276854
						Ifnar1	0.436545	0.2716
						Tut7	0.436634	0.274615
						LOC100125364	0.437079	0.303181
						Yaf2	0.438226	0.252569
						Chrac1	0.438982	0.333007
						AABR07042936.1	0.441008	0.364611
						Pxmp2	0.441079	0.289703
						Hs2st1	0.441821	0.386091
						Ramac	0.442487	0.276751
						Oser1	0.444588	0.285481
						U2af1l4	0.445531	0.295307
						Src	0.446252	0.267383
						Cdh4	0.446252	0.267709
						Leprot	0.446252	0.251996
						Slc17a5	0.446252	0.258878
						AABR07019088.1	0.446252	0.250574
						Ptprg	0.446518	0.274667
						Ttc9b	0.447827	0.332972
						Dusp26	0.449558	0.29731
						Mrpl50	0.45011	0.293259
						Ncam2	0.452001	0.316783
						Mrps21	0.452157	0.283996
						Med21	0.453054	0.25548
						Vat1l	0.454076	0.268976
						Ddx6	0.454138	0.292025
						Afdn	0.455328	0.254056
						Trpm7	0.455533	0.337717
						Wdr55	0.455682	0.251434
						Crmp1	0.456401	0.261229
						Clint1	0.459471	0.273387
						Gtpbp8	0.459471	0.255893
						Camk2n1	0.463302	0.28186
						Cntn4	0.464419	0.393326
						Lamtor2	0.465511	0.250994
						Sat2	0.465583	0.297753
						Rasa4	0.466949	0.340908
						Rnf146	0.469526	0.276683
						Tuba4a	0.469799	0.337385
						Tut1	0.470562	0.260694
						Rd3l	0.471552	0.269706
						Huwe1	0.47319	0.262761
						Wdr59	0.474764	0.251077
						Jun	0.47549	0.418442
						Twistnb	0.475625	0.279169
						Ankrd46	0.475776	0.263763
						Kdm4c	0.475989	0.379439
						Rogdi	0.479142	0.285167
						Prps1	0.479903	0.324732
						Hmgn3	0.479947	0.301457
						Adgrb3	0.481067	0.315476
						Cep19	0.4812	0.268341
						Brdt	0.481319	0.313288
						Hspbap1	0.481319	0.285944
						Nrtn	0.485192	0.259107
						Ccdc186	0.485348	0.268518
						Lysmd2	0.486102	0.2821
						Stxbp3	0.487816	0.277066
						Plbd2	0.488337	0.279954
						Sapcd1	0.48919	0.281508
						Maco1	0.492384	0.309494
						Pcif1	0.493243	0.313567
						Mrpl35	0.494073	0.257583
						Tbcc	0.49728	0.263671
						Cntrl	0.498304	0.250576
						Sft2d1	0.500985	0.294033
						Pafah1b3	0.501187	0.288549
						Nup214.1	0.501409	0.300081
						Sec31a	0.502385	0.255901
						Acap2	0.507088	0.406491
						Socs5	0.507394	0.345247
						Dnajb4	0.510264	0.305455
						Cfap20	0.510541	0.321434
						Dohh	0.510552	0.284849
						Ppp1r8	0.511796	0.271626
						Tmem260	0.513297	0.312518
						Ttc14	0.514235	0.312496
						LOC500956	0.517148	0.315887
						Samd5	0.518687	0.283166
						Sh3bgrl2	0.518687	0.255949
						Cdk9	0.520876	0.251487
						Spsb3	0.521072	0.276867
						Prpf39	0.521119	0.293094
						Senp6	0.521292	0.267609
						Etfa	0.521847	0.270593
						Cep68	0.523428	0.279067
						AABR07066379.1	0.524027	0.313543
						Pop7	0.524741	0.266282
						Negr1	0.525193	0.260799
						Epb41l5	0.52702	0.376356
						Ppp4r2	0.530042	0.290705
						Ddx41	0.530856	0.268759
						Zfp566	0.53587	0.282774
						Cr1l	0.53587	0.305655
						Srp68	0.536631	0.253852
						AC134224.3	0.537831	0.271926
						Nfu1	0.541415	0.310337
						Depdc5	0.541536	0.30117
						Ikbip	0.543001	0.262826
						Hras	0.5449	0.269978
						Rassf1	0.545119	0.295261
						Rnf19b	0.547019	0.312052
						Ngly1	0.547093	0.267937
						Arfgap2	0.548566	0.256349
						Crcp	0.549339	0.251814
						Chrna3	0.551273	0.38636
						Clcn4	0.552273	0.304946
						Itga9	0.552404	0.344832
						Ift43	0.554549	0.280404
						Tra2b	0.554833	0.275436
						Atp2c1	0.554938	0.323633
						LOC103689968	0.557089	0.255576
						Pin4	0.558103	0.265495
						Nup93	0.558103	0.264591
						Msrb3	0.558457	0.250431
						Gipc1	0.560148	0.257615
						Epha3	0.562644	0.256766
						Btrc	0.562803	0.307033
						Ptprt	0.563385	0.374735
						Kmt5b	0.563784	0.284135
						Vps37d	0.565787	0.285802
						Hecw2	0.566824	0.27674
						AABR07016141.1	0.567067	0.290917
						Btbd3	0.567242	0.322895
						Sh3gl3	0.56855	0.293165
						Kif16b	0.568907	0.306379
						Map6	0.574113	0.30988
						Sult4a1	0.574875	0.274907
						Tnpo2	0.575518	0.271203
						Nipa1	0.580169	0.252883
						Ccndbp1	0.580551	0.307544
						Snrnp40	0.581213	0.304279
						Galnt2	0.581393	0.253428
						Rin2	0.585327	0.256167
						Tsta3	0.587215	0.253376
						Bola2	0.58857	0.277039
						Ethe1	0.590155	0.27422
						Atg7	0.591877	0.253867
						AABR07061825.1	0.592571	0.265404
						Tubb2b	0.596643	0.286568
						Sema3e	0.597728	0.295241
						Mef2c	0.598583	0.26509
						Cop1	0.603444	0.307714
						Vps72	0.605913	0.264764
						Pank2	0.606595	0.330157
						Nwd2	0.610291	0.316305
						Eif3d	0.613151	0.251552
						Thyn1	0.615612	0.264186
						Coq10a	0.619931	0.282903
						Miga1	0.621031	0.298952
						Trim27	0.62846	0.275137
						Flot1	0.633615	0.342937
						Sugt1	0.633906	0.253424
						N4bp2l2	0.635543	0.274398
						Whrn	0.641517	0.258017
						Dut	0.641678	0.301233
						Gucy1a2	0.64184	0.270212
						Igtp	0.645594	0.281768
						Mrpl14	0.646694	0.272466
						Stat2	0.646736	0.399833
						Lhpp	0.65093	0.258438
						Iqck	0.651015	0.259964
						Hpca	0.652569	0.403315
						Epha7	0.656085	0.299936
						Vps4b	0.656085	0.283666
						Hint2	0.659519	0.309355
						Hmgn2	0.659716	0.25792
						AABR07026291.1	0.660297	0.315996
						Rhbdl1	0.665525	0.27755
						Ap3b1	0.666725	0.264786
						Castor2	0.667157	0.28025
						Yeats2	0.667778	0.274936
						Snx17	0.673524	0.277129
						Map2k2	0.673906	0.281083
						Pan3	0.677608	0.272797
						Tmem63b	0.678518	0.257895
						Neto1	0.683102	0.336558
						Asb6	0.685238	0.256001
						Smyd2	0.685684	0.263864
						Ppp2r3a	0.686867	0.250036
						Chpt1	0.691021	0.25076
						Mtf2	0.694356	0.258139
						Prpf18	0.696386	0.270251
						Nupl2	0.701031	0.355321
						Sirt3	0.7013	0.298127
						Ahcyl1	0.713686	0.336118
						Kat7	0.719392	0.289525
						Pla2g6	0.72198	0.255833
						Smyd1	0.734541	0.262293
						Dek	0.737496	0.297851
						Bcr	0.742565	0.277688
						Stat5b	0.743447	0.253799
						Rpl37	0.744859	0.310478
						Usp25	0.744943	0.268097
						Dmap1	0.74766	0.302115
						Usf1	0.752137	0.257645
						Jazf1	0.756068	0.251384
						Chic1	0.759295	0.268374
						Alkbh7	0.772552	0.251171
						Nova1	0.775617	0.277609
						Rho	0.776488	0.255365
						Abca13	0.777459	0.277641
						Mrpl55	0.784996	0.307486
						Ccser2	0.790196	0.258067
						B4galt6	0.790241	0.263632
						Stk3	0.793326	0.258441
						AABR07007675.1	0.793375	0.308971
						Sirt7	0.800481	0.299317
						Fibp	0.811435	0.259055
						Zmym5	0.81259	0.255773
						Zfyve28	0.814298	0.253772
						Srgap2	0.815909	0.262608
						Dbnl	0.818292	0.298688
						Nr1d1	0.826501	0.251714
						Rybp	0.84611	0.273143
						Gnb3	0.852557	0.333336
						LOC304725	0.854508	0.418479
						Tpd52l1	0.859182	0.264693
						Ube3d	0.864832	0.251773
						Mphosph6	0.869472	0.283142
						Tmem255a	0.880879	0.267557
						Clvs1	0.882185	0.294149
						Etfb	0.882924	0.295214
						Atrnl1	0.88372	0.255464
						Ablim2	0.8862	0.252844
						H2afy2	0.886367	0.28395
						S100a3	0.893552	0.326087
						Vkorc1	0.896715	0.256201
						Ppp2r2d	0.896909	0.262807
						Cc2d2a	0.897506	0.292898
						Cdk14	0.899556	0.280357
						Orc4	0.906252	0.302776
						Pak3	0.917431	0.270487
						Supt20h	0.925281	0.252491
						Atg4c	0.927688	0.251561
						Yrdc	0.948595	0.250435
						Vgll4	0.956487	0.264236
						Stat3	0.965526	0.299738
						AABR07033882.1	0.969958	0.270873
						Vip	0.975704	-1.07346
